# Supplementary material for: Common laboratory results-based artificial intelligence analysis achieves accurate classification of plasma cell dyscrasias
Source: PeerJ journal article supplement (doi:10.7717/peerj.18391), 2024-11-04
Supplement: Diagnosticmodeldataset.xlsx [file Diagnosticmodeldataset.xlsx]

## Sheet: research group
diagnosis	plasma cell dyscrasias-1/non-plasma cell dyscrasias-0	sex （female0/male 1)	age	HB	Serum calcium	Serum creatinine	ESR	light chain κ/λ ratio	light chain κ	light chain λ	Albumin/globulin ratio	Albumin	globulin	β2 -microglobulin
SMM	1	1	65	123	2.15	60.5	103	3.62609	41.7	11.5	0.4227	29.3	69.9	1.8
SMM	1	1	64	3.35238	35.2	10.5	45	0.191489	4.5	23.5	0.87	31	35.4	2.6
SMM	1	1	58	125	2.85	50.5	56	20.8943	25.7	1.23	0.76	34.7	45.1	3.7
SMM	1	0	55	130	2.31	55.4	76	0.0295864	2.79	94.3	0.28	25.3	89.3	2.1
MM	1	0	56	99	2.23	59.6	26	4.00833	4.81	1.2	1.88	39	20.8	2.7
MM	1	1	52	110	2.17	65.3	30	0.291111	13.1	45	0.83	42	50.5	3.3
MM	1	1	70	85	2.27	90.3	11	4.43503	15.7	3.54	1.28	37.1	28.9	2.7
MM	1	0	71	119	2.25	67.7	120	11.5242	31	2.69	0.65	33.2	51.4	2.7
MM	1	1	71	94	2.54	111.2	17	0.00143953	6.19	4300	2.03	45.2	22.3	6.44
MM	1	0	56	98	2.15	83.3	18	10.6579	16.2	1.52	0.98	32.1	32.9	4.3
MM	1	1	77	88	1.99	264	40	3.39806	17.5	5.15	1.05	33.3	31.7	13.8
MM	1	1	69	117	2.32	154.3	35	0.11117	4.18	37.6	0.91	41	45.2	4.4
MM	1	0	68	80	2.28	70.4	120	15.2174	35	2.3	1.17	37.9	32.5	4.5
MM	1	0	67	82	2.23	67.9	25	0.132564	9.31	70.23	0.76	27.7	36.5	2.69
MM	1	1	64	80	2.85	95	50	5.40897	20.5	3.79	1.4	29.4	21	7.5
MM	1	0	48	90	2.21	69.3	90	0.896175	4.92	5.49	1.62	36.6	22.6	2.5
MM	1	0	71	120	2.04	62.8	50	7.95122	32.6	4.1	1.77	36.3	20.5	4.1
MM	1	1	86	90	2.55	106.9	60	135.263	51.4	0.38	0.29	29.7	101.1	3.5
MM	1	1	74	119	2.79	75.6	75	17.8351	17.3	0.97	0.52	29.6	57	4.3
MM	1	0	83	74	2.17	474	67	0.0679379	48.1	708	0.59	31.1	52.6	5.6
MM	1	0	59	95	2.33	62.9	75	0.0169502	8.17	482	0.75	34.8	46.4	4.2
MM	1	0	78	71	2.27	77.1	70	10.0943	32.1	3.18	0.45	29.8	65.5	3.9
MM	1	0	64	85	2.48	45.6	65	0.155046	1.69	10.9	0.61	36.1	59.5	2.67
MM	1	1	80	118	2.45	145	60	0.280488	11.5	41	1.21	39.4	32.6	3.5
MM	1	1	38	153	2.89	85.5	18	0.272195	5.58	20.5	1.5	45.6	30.4	3.6
MM	1	1	87	85	2.33	86.4	45	52.7586	30.6	0.58	1.6	41.4	25.9	5.9
MM	1	0	72	46	1.95	61.4	40	0.00778032	0.34	43.7	0.6	26.2	43.7	7.4
MM	1	1	59	98	2.38	112	50	0.0717391	2.64	36.8	0.7	31.7	45.2	9.01
MM	1	0	83	97	2.07	638.9	120	4.6	20.7	4.5	0.54	22.5	41.7	3.5
MM	1	1	69	88	2.09	116.6	60	0.038806	1.82	46.9	0.42	29.9	70.8	2.71
MM	1	1	61	95	2.29	66.8	3	34.0777	35.1	1.03	0.45	31.3	69	5.93
MM	1	0	81	90	1.96	35.5	97	0.0783282	2.53	32.3	0.58	31.7	54.6	4
MM	1	0	91	84	2.86	152.9	50	5.06077	91.6	18.1	1.1	35.6	32.5	3.5
MM	1	1	67	89	2.5	82.6	40	0.161875	2.59	16	0.52	28.7	55.7	4.1
MM	1	1	57	127	1.88	91.7	73	75.5	377.5	5	0.66	34.9	52.8	3.6
MM	1	1	88	95	2.08	89	45	0.25431	2.36	9.28	0.99	25.4	25.7	3.86
MM	1	1	70	107	2.2	75.5	50	5.45161	16.9	3.1	1.17	28.4	24.3	3.45
MM	1	1	67	90	2	56.6	55	39.3671	62.2	1.58	0.34	25.2	73.9	4.87
MM	1	1	50	83	2.04	51.8	30	30.9574	29.1	0.94	1.84	31.4	17.1	4.5
MM	1	1	77	99	2.49	98.9	33	0.136576	7.02	51.4	0.39	27.3	70.6	6.3
MM	1	1	67	98	2.04	78	32	16.7368	15.9	0.95	0.68	32.4	47.4	5.8
MM	1	1	77	103	2.2	831	30	3.41917	23.9	6.99	1.28	32.6	25.5	3.2
MM	1	0	64	93	2.41	115.8	29	0.0956835	1.33	13.9	1.3	37.4	28.8	5.28
MM	1	0	62	104	2.33	79.8	29	53.2787	65	1.22	0.64	36.3	56.9	3
MM	1	1	50	70	2.13	272.3	11	0.0649635	8.9	137	1.51	33.6	22.3	5.9
MM	1	0	69	81	1.61	459	30	8.26667	18.6	2.25	0.9	32.7	36.4	8
MM	1	0	73	81	2.41	73.1	114	0.0157224	1.11	70.6	0.29	29.6	103.2	4.5
MM	1	1	73	80	1.84	58.1	71	0.172078	2.65	15.4	0.65	32.1	49.6	5.6
MM	1	0	62	97	1.55	289.4	21	136.364	3150	23.1	0.72	32.4	45.2	9.6
MM	1	0	81	75	1.98	607	120	0.028481	0.9	31.6	0.52	28.6	55.4	3.5
MM	1	0	65	73	2.19	418	29	0.00540532	18.07	3343	1.1	33.2	30.2	21.3
MM	1	1	82	66	2.3	162	27	0.120202	3.57	29.7	0.46	24.9	53.8	3.5
MM	1	1	73	90	2.42	69	45	0.182511	4.07	22.3	0.66	37.4	56.3	4.28
MM	1	0	72	90	2.24	257	81	0.286833	34.42	120	0.89	33.1	37.4	4.5
MM	1	0	69	76	2.3	61.6	30	10.8582	29.1	2.68	0.62	33.1	53.8	5.6
MM	1	1	69	75	1.58	590	29	0.248621	7.21	29	0.89	26.7	30.1	12.2
MM	1	0	54	91	2.35	37.7	37	68.4252	86.9	1.27	1.46	33.2	22.8	16.7
MM	1	1	60	103	2.36	187.1	65	0.779279	5.19	6.66	1.33	31.7	23.9	3.9
MM	1	1	67	98	2.45	120.8	6	3.19048	33.5	10.5	1.91	37.2	19.5	8.35
MM	1	1	76	101	2.56	81.2	30	0.100728	6.92	68.7	0.47	28.6	61.5	4.67
MM	1	1	78岁	94	2.31	165.7	32	25.1915	59.2	2.35	0.711	41.4	58.4	10.4
MM	1	0	73岁	94	2.13	49.5	120	0.0741107	3.75	50.6	0.5	30.5	60.5	4.4
MM	1	0	56岁	98	2.03	59.4	24	68.4252	86.9	1.27	0.43	31.9	73.7	2.7
MM	1	0	55岁	83	2.25	46.6	120	84.4444	68.4	0.81	0.61	38.5	63.4	2.2
	1							#DIV/0!
MM	1	1	73岁	90	1.94	93.4	68	3.46154	45	13	1.19	31.5	26.5	4.5
MM	1	0	92岁	101	2.11	270.2	45	3.43612	15.6	4.54	1	30.9	61.8	3.5
MM	1	0	74	72	2.05	383.5	40	0.131522	1.21	9.2	1.43	32.1	22.5	18
MM	1	1	60	116	2.06	78.7	50	0.181466	4.21	23.2	1.35	37.9	28.1	3.1
MM	1	1	60	146	2.18	69.3	8	0.172009	16.1	93.6	1.54	36.9	23.9	2.7
MM	1	0	69	96	1.97	160.5	42	0.110755	58.7	530	0.17	21	121.1	14.4
MM	1	1	62	65	2.08	106.1	4	0.0510526	2.91	57	0.19	18.6	99.6	8.87
MM	1	0	67	87	2.25	82.2	36	7.63158	145	19	2.37	34.1	14.4	7.1
MM	1	1	63	89	1.9	54.8	35	0.0293976	1.22	41.5	0.78	36.8	47.3	4.3
MM	1	0	80	109	2.28	96.1	40	162.432	60.1	0.37	0.61	34.7	57	7.3
MM	1	1	67	98	2.19	62.4	40	97.2549	49.6	0.51	0.63	37	59.2	3.3
MM	1	0	84	102	2.24	59.7	57	0.0511278	1.36	26.6	0.92	37.9	41.3	14.4
MM	1	1	71	102	2.27	80.3	100	15.5346	24.7	1.59	0.84	35.5	42.3	7.4
MM	1	0	59	118	2.1	79.5	45	4.61765	4.71	1.02	1.71	37.5	21.9	2.3
MM	1	1	68	98	2.05	65.3	15	32.8777	457	13.9	1.3	31.5	24.3	2.2
MM	1	1	65	117	1.75	114.1	35	3.66842	6.97	1.9	2.08	40.1	19.3	3.66
MM	1	1	84	73	2.21	167	91	0.00444444	0.52	117	0.29	25.7	89.9	6.5
MM	1	1	76	105	2.35	90.8	40	0.286885	3.5	12.2	1.36	36.8	27.1	4.5
MM	1	1	72	100	2.07	89.9	45	0.0177778	1.52	85.5	0.28	25.5	92.1	4.3
MM	1	1	51	136	2.16	99.8	49	10.4571	183	17.5	2.21	41.5	18.8	3.1
MM	1	0	62	49	1.95	116.8	50	304	91.2	0.3	0.21	24.7	115.7	13.3
MM	1	1	69	98	1.97	143.5	45	106	90.1	0.85	0.2	18.3	91.3	13.2
MM	1	0	71	79	2.39	48.8	102	0.2592	3.24	12.5	1.21	32	26.5	2.5
MM	1	1	64	125	2.22	108.1	40	3.085	6.17	2	1.85	46	24.8	3.4
MM	1	1	62	116	2.41	105.1		0.272966	10.4	38.1	1.99	36.6	18.4	6.3
MM	1	1	67	110	2.05	61.9	56	0.232934	3.89	16.7	1.15	29.1	25.4	3
MM	1	0	79	94	2.33	129	58	2.21134	4.29	1.94	1.98	37.6	19	4.9
MM	1	1	69	114	2.21	101.2	60	0.385689	2.21	5.73	1.46	34.8	23.8	4.6
MM	1	1	85	80	2.26	165.9	60	2.02381	11.9	5.88	0.646	28.5	44.1
MM	1	1	50	116	2.04	70	62	7.63462	39.7	5.2	0.43	28.8	67.4	2.5
MM	1	0	75	107	2.24	64.4	60	0.0835165	22.8	273	1.83	31.3	17.1	3.5
MM	1	1	48	134	2.22	106.8	33	40	37.6	0.94	0.74	36.8	49.9	3.21
MM	1	1	69	120	2.24	75.1	2	3.625	4.35	1.2	2.07	37.1	17.9	2.58
MM	1	1	62	96	2.25	101	34	1.81273	4.84	2.67	1.13	33.8	30	7.8
MM	1	1	74	51	1.72	283	20	0.0239645	81	3380	0.16	16.8	102.9	42.6
MM	1	1	68	96	2.45	88.4	25	3.02092	72.2	23.9	1.48	36.1	24.4	2.9
MM	1	1	65	82	1.94	77.1	26	0.0103741	0.61	58.8	0.37	24.1	65.1	7.3
MM	1	1	53	114	2.36	98.6	28	0.288235	2.45	8.5	2.18	36.2	16.6	4.6
MM	1	1	77	91	2.14	90.5	30	0.296117	1.83	6.18	0.67	30	44.7	11.9
MM	1	0	54	102	2.85	65.1	20	85.6436	346	4.04	0.88	37.3	42.3	9
MM	1	0	57	86	2.02	44.7	15	17.4667	26.2	1.5	0.67	31.9	47.6	6.3
MM	1	0	74	97	2.56	82.4	23	131.636	72.4	0.55	0.62	36.2	58.3	7.2
MM	1	1	69	99	2.28	241	16	551.724	51200	92.8		35.5	50.9	4.5
MM	1	0	49	107	2.31	69.9	5	3.63036	33	9.09	1.44	37.8	26.2	2.3
MM	1	0	57	96	2.69	85.5	45	8.74317	160	18.3	1.48	35.7	24.1	4.3
MM	1	1	59	102	2.05	63	71	6.68868	7.09	1.06	1.04	31.9	30.8	3.87
MM	1	0	84	70	2.02	44.3	50	7.22414	83.8	11.6	0.46	23	50.3	3.5
MM	1	1	71	51	2.16	116	55	8.13187	22.2	2.73	0.19	20	104.5	4
MM	1	1	80	65	2.31	73.7	67	0.138732	1.97	14.2	0.51	34	66.7	4.5
MM	1	1	58	83	2.34	121.8	22	77.5676	287	3.7	2.67	43.6	16.3	4.1
MM	1	0	66	67	2.15	75.7	15	6.73913	124	18.4	1.33	36.7	27.5	3.7
MM	1	1	53	95	3.45	274.6	56	7.57273	83.3	11	1.75	36.1	20.6	2.9
MM	1	1	58	90	2.33	66.5	58	3.73077	19.4	5.2	1.8	36.1	20.1	3.4
MM	1	1	66	99	2.37	75.4	53	0.230939	4.18	18.1	0.72	36.2	50.3	2.5
MM	1	1	50	85	2.8	171.8	70	13.4977	115	8.52	0.23	27.8	123.5	5.1
MM	1	0	63	61	1.75	84.5	45	5.6087	25.8	4.6	1.5	25.4	16.9	4.4
MM	1	0	63	77	3.33	245.9	24	222.699	3630	16.3	2.14	36.3	17	16.2
MM	1	1	59	93	2.26	158	56	5.64417	184	32.6	17	28.8	17	5.7
MM	1	1	58	78	3.64	162.7	25	0.2625	2.94	11.2	0.45	29.9	66.2	3.8
MM	1	1	70	68	1.89	183.5	38	0.0234483	0.68	29	0.49	25.9	52.5	14.1
MM	1	1	65	54	2.19	591.5	33	0.0659259	1.78	27	1.52	38.5	25.4	27.7
MM	1	1	70	86	2.05	119.6	120	0.0362903	2.7	74.4	0.27	21.6	79	4.01
MM	1	1	71	84	2.15	77.1	58	3.72917	35.8	9.6	1.03	36.1	35.2	4.5
MM	1	0	78	82	2.1	61.3	113	153.051	90.3	0.59	0.55	33.7	61.6	4.8
MM	1	0	85	67	2.43	87.3	2	0.291457	5.8	19.9	1.11	40.1	36.2	3.08
MM	1	0	98	99	2.22	68	21	4.1791	11.2	2.68	1.48	40.1	27.1	2.6
MM	1	0	68	86	2.54	50.1	60	23.9114	64.8	2.71	0.52	29.5	56.5	4
MM	1	1	56	94	2.16	90.2	65	128.462	66.8	0.52	0.33	26.7	79.8	3.99
MM	1	0	76	80	2.01	62.8	58	0.0636364	1.82	28.6	0.44	23.4	52.6	4.5
MM	1	0	69	98	2.28	70.1	110	11.1675	22	1.97	0.71	32.5	45.9	3.5
MM	1	1	80	88	2.01	69.2	50	11.1111	31	2.79	0.58	29	49.9	5.22
MM	1	0	58	85	2.22	55.1	35	10.3727	167	16.1	1.34	35.7	26.7	3.05
MM	1	0	61	113	2.32	65.8	32	15.1685	135	8.9	1.14	42.3	37.1	2.9
MM	1	1	76	99	1.46	129	30	0.335058	2.59	7.73	1.19	25	21	4.09
MM	1	1	73	131	2.33	143.1	120	22.7559	28.9	1.27	0.58	34.5	59.6	3.36
MM	1	1	70	102	2.34	70.5	25	0.0789744	3.08	39	0.49	30	60.9	4.48
MM	1	1	51	84	2.21	122.3	30	9.31655	25.9	2.78	0.87	39.4	45.1	3.9
MM	1	1	71	98	2.23	104	3	0.269139	22.5	83.6	1.3	43.5	33.4	2.5
MM	1	1	64	101	2.29	86.2	30	5.10903	16.4	3.21	0.61	33.1	54.4	2.3
	1							#DIV/0!
MM	1	1	81	88	2.24	121.5	25	0.285612	3.97	13.9	0.47	26.3	55.6	8.7
MM	1	1	60	80	2.31	719	30	0.171895	2.63	15.3	1.2	34.2	28.4	3.5
MM	1	1	81	84	2.06	61.7	35	12.6538	32.9	2.6	0.54	23.6	43.9	3.8
MM	1	0	47	98	2.18	66.2	104	5.1506	17.1	3.32	0.99	33.6	33.9	2.9
MM	1	1	69	67	2.86	240	35	0.0267769	1.62	60.5	0.31	17.5	55.8	25.6
MM	1	1	56	99	2.4	136	34	4.94074	66.7	13.5	1.81	38.9	21.5	5.61
MM	1	1	57	107	2.19	73.5	30	8.98089	141	15.7	1.19	35.2	29.7	2.6
MM	1	1	71	71	2.04	68.2	120	82.7869	101	1.22	0.35	23.8	67.7	7.53
MM	1	1	53	110	2.4	164	41	5.59245	1482	265	0.95	43.3	45.4	5.1
MM	1	1	54	65	2.98	230	20	111.194	74.5	0.67	0.31	24.4	79.2	12.5
MM	1	1	71	90	2.15	110	71	0.0108859	14.5	1332	1	31.5	31.4	6.3
MM	1	1	52	126	2.43	99.5	120	0.0447619	14.1	315	0.69	35.7	51.8	3.41
MM	1	1	77	82	2.06	79.5	45	0.18494	3.07	16.6	1.02	37.7	37	4.5
MM	1	1	55	112	2.19	80.2	36	0.157407	1.7	10.8	0.8	27.6	34.4	3
MM	1	1	68	122	2.25	66.6	19	0.014434	15.3	1060	1.48	33.2	22.5	2.8
MM	1	0	63	75	2.28	63.8	51	0.0133163	1.04	78.1	0.24	30.9	129.8	3
MM	1	1	60	90	2.19	67.7	12	5.20179	11.6	2.23	1.06	33.7	31.8	3.2
MM	1	0	71	107	1.97	62	69	4.0449	99.1	24.5	0.54	27.4	50.9	4.6
MM	1	1	70	126	2.12	55.9	45	0.171564	3.62	21.1	1.12	31	27.8	2.6
MM	1	1	77	76	2.13	68.3	50	27.7483	41.9	1.51	0.89	34.9	39.2	4.8
MM	1	1	62	65	2.16	295	27	143.929	80.6	0.56	0.55	28.5	51.8	2.8
MM	1	1	59	98	2.8	96.9	55	0.0766026	2.39	31.2	0.89	41.3	46.5	4.5
MM	1	1	70	88	2.45	81	95	0.720096	30.1	41.8	0.74	25.8	35	9
MM	1	1	73	110	2.4	69.3	60	16.6327	32.6	1.96	0.92	40.6	44.1	4.5
MM	1	0	79	102	2.65	55.5	16	3.78409	9.99	2.64	1.31	32.5	24.9	2.6
MM	1	0	74	115	2.13	58	61	16.5517	33.6	2.03	0.95	41.6	43.8	3.9
MM	1	1	69	98	3.59	323.7	120	0.15119	3.81	25.2	0.28	19	67.8	15.92
MM	1	1	86	77	2.25	445.2	100	12.439	20.4	1.64	1.45	38.8	26.7	3.9
	1							#DIV/0!
	1							#DIV/0!
MM	1	1	53	90	2.45	138.9	45	79.5789	75.6	0.95	0.57	25.8	45	6.5
MM	1	1	52	45	2.03	114.1	110	391.667	4230	10.8	0.2	22.4	113.7	10.2
MM	1	1	44	98	2.3	108.8	65	2.63158	175	66.5	1.37	39.5	28.8	3.1
MM	1	0	70	112	2.15	33.2	45	0.0153532	8.26	538	0.78	26.1	33.6	9
MM	1	1	95	99	2.78	116	45	3.34101	14.5	4.34	1.23	35.2	28.7	9
MM	1	0	62	100	1.93	54.1	115	0.221725	6.94	31.3	0.97	28.9	29.8	3.3
MM	1	0	70	71	2.11	266	120	0.144105	6.6	45.8	1.24	27.4	22.1	4.5
MM	1	1	71	99	2.17	106.8	102	3.18072	13.2	4.15	1.02	34.4	33.6	5.6
MM	1	0	74	99	2.26	48.4	35	0.229204	2.59	11.3	1.22	37.9	31	4.5
MM	1	1	67	128	1.76	50.5	50	11.6667	89.95	7.71	1.89474	32.4	17.1	9.18
MM	1	1	62	114	2.58	63.7	120	20.8943	25.7	1.23	1.01	34.7	34.4	3.7
MM	1	1	69	121	4.07	291.4	120	0.0295864	2.79	94.3	0.286848	25.3	88.2	2.1
MM	1	0	61	134	2.16	52.6	45	3.65116	15.7	4.3	2.31	42.3	18.5	2.7
MM	1	0	80	94	2.23	57.22	120	17.98	89.9	5	2.0989	38.2	18.2	2.58
MM	1	1	75	63	2.32	328	140	0.00272727	12.9	4730	0.5	27.4	54.6	23.3
MM	1	0	69	44	2.14	68.62	100	128.959	9040	70.1	0.48398	28.7	59.3	6.95
MM	1	0	69	67	2.14	104.76	56	176.667	5300	30	0.372754	24.9	66.8	19.19
MM	1	0	61	63	2.09	50.08	139	0.0890547	179	2010	0.289209	20.1	69.5	5.2
MM	1	0	65	58	2.16	142	140	0.22381	235	1050	0.182353	12.4	68	14.4
MM	1	0	77	97	2.04	522	56	0.42055	352	837	1.69388	33.2	19.6	5.2
MM	1	1	61	139	2.05	178	100	0.196078	200	1020	0.35461	25	70.5	3.5
MM	1	1	72	92		142.16	59	0.0031087	8.58	2760	2.44318	43	17.6	12.32
MM	1	0	45	47	2.34	125.5	60	0.2872	359	1250	1.79602	36.1	20.1	7.8
MM	1	0	72	78	3.98	277	70	0.127301	415	3260	1.16484	31.8	27.3	10.87
MM	1	1	73	64	2.24	86.46	55	255.696	10100	39.5	0.256527	22.6	88.1	5.6
MM	1	1	74	91	2.28	112	60	3.46067	308	89	0.780645	36.3	46.5	2.62
MM	1	0	78	55	2.07	53.1	157	0.21342	493	2310	0.83	33.2	40	8.1
MM	1	1	60	109	2	48.33	45	27.3913	3780	138	0.96882	43.5	44.9	2.44
MM	1	0	80		2.21	81	35	0.0666667	30	450	0.29	23.2	80	5.6
MM	1	1	66	67	2.78	129	20	79.3323	4990	62.9	0.332143	27.9	84	10.7
MM	1	1	76	111	2.36	135	120	2.43289	725	298	0.51259	28.5	55.6	9.6
MM	1	0	62	76	2.18	110.9	155	0.0311475	95	3050	0.486911	27.9	57.3	4.5
MM	1	1	64	92	2.19	180	11	0.29	87	300	0.756972	38	50.2	16
MM	1	1	58	66	2.09	184.14	15	0.00457971	63.2	13800	0.21328	21.2	99.4	11.11
MM	1	0	78	49	2.07	53.13	157	0.21342	493	2310	1.0035	28.7	28.6	4.5
MM	1	1	47	99	2.01	72.05	15	808	4040	5	1.53812	34.3	22.3	7.27
MM	1	0	71	128	2.4	59.57	75	0.118529	435	3670	1.13103	32.8	29	2.37
MM	1	0	84	122	2.28	114	34	0.0846154	297	3510	0.774127	37.7	48.7	6.25
MM	1	1	75	98	1.94	55.62	27	0.211462	535	2530	0.545852	25	45.8	2.1
MM	1	1	80	84	2.11	115.9	40	0.293275	880	3000.6	1.70085	39.8	23.4	4.9
MM	1	0	76	79	2.26	716	23	0.00569231	1.85	325	2.01111	36.2	18	15
MM	1	0	76	82	2.26	453.5	56	0.288043	265	920	2.22172	49.1	22.1	15
MM	1	0	73	69	1.83	66.81	60	126	630	5	0.120588	12.3	102	32.8
MM	1	0	90	88	1.81	56.69	45	16.1318	5630	349	0.386774	19.3	49.9	8.97
MM	1	0	69	141	2.24	71.28	67	5.33482	2390	448	1.68627	43	25.5	1.85
MM	1	0	71	82	2.03	80.06	35	0.231841	466	2010	0.592	29.6	50	4.27
MM	1	1	64	82	2.78	78.33	139	104.585	7300	69.8	0.506645	30.5	60.2	4.46
MM	1	0	83	108	2.28	55.6	65	23.3871	290	12.4	1.35227	35.7	26.4	3.9
MM	1	1	86	96	2.44	70.85	10	1.91201	1130	591	1.3	35.1	27	2.26
MM	1	0	75	129	2.14	42.04	140	0.139702	563	4030	0.904306	18.9	20.9	2.23
MM	1	0	81	55	2.46	221.62	70	39.9541	3480	87.1	0.95122	19.5	20.5	4.5
MM	1	1	57	129	2.13	65.16	9	4.29348	1580	368	0.972637	39.1	40.2	1.61
MM	1	0	85	73	2.24	55.62	45	102.523	7720	75.3	0.30821	22.9	74.3	10.38
MM	1	1	91	112	2.4	99.91	40	0.412752	615	1490	1.08116	37.3	34.5	4.47
MM	1	1	81	80	1.77	50.74	39	10.1087	1860	184	0.922261	26.1	28.3	2.97
MM	1	1	76	108	2.29	111.42	55	0.125373	252	2010	0.960494	38.9	40.5	7
MM	1	1	64	143	2.19	65	20	23.743	4250	179	0.869565	40	46	2.28
MM	1	1	79	108	2.06	61.44	25	3.57143	2500	700	0.826471	28.1	34	4.89
MM	1	1	79	91	2.15	102.88	30	3.55191	650	183	1.68376	39.4	23.4	5.17
MM	1	0	12	138	2.49	88	8	0.0889423	1.85	20.8	1.28148	34.6	27	6.28
MM	1	0	74	147	2.02	93.57	35	271.667	8150	30	0.450742	33.4	74.1	7.32
MM	1	1	79	85	2.62	83.08	30	0.0452381	171	3780	0.235362	20.5	87.1	11.91
MM	1	1	67	116	1.97	104.61	40	3.35	670	200	1.92188	36.9	19.2	3.18
MM	1	1	73	75	2.22	98.85	38	0.085879	298	3470	0.526957	30.3	57.5	5.23
MM	1	1	60	105	2.24	74.71	35	4.34483	504	116	1.57511	36.7	23.3	6.25
MM	1	1	87	84	1.93	53.82	22	10.1053	1920	190	1.14887	35.5	30.9	4.87
MM	1	1	70	80	2.36	96	140	2.09346	1120	535	1.38532	30.2	21.8	4.31
MM	1	1	92	94	2.36	118.81	128	4.82546	2350	487	0.986807	37.4	37.9	20.22
MM	1	0	62	108	2.19	49.39	40	0.233333	350	1500	2.15	43	20	1.88
MM	1	1	79	87	2.08	163	35	0.0510363	197	3860	0.707657	30.5	43.1	9.74
MM	1	0	63	125	2.19	54.39	30	0.289902	89	307	1.7379	43.1	24.8	1.07
MM	1	1	50	54	2.38	739.34	95	19.2641	4450	231	0.779381	37.8	48.5	16.47
MM	1	1	69	61	2.63	76.44	35	17.7885	1850	104	0.397976	23.6	59.3	3.9
MM	1	0	88	95	2.24	158.6	121	0.171223	238	1390	1.11714	39.1	35	9.02
MM	1	1	74	118	1.96	67.56	107	4.30769	3360	780	0.261669	18.5	70.7	3.31
MM	1	0	79	104	2.44	108.25	50	3.36667	1010	300	1.05	44.1	42	3.84
MM	1	1	80	77	2.02	139.98	122	4.76543	1930	405	1.34259	29	21.6	5.95
MM	1	0	71	78	2.26	73.6	100	0.221739	255	1150	0.940945	23.9	25.4	4.6
MM	1	0	86	67	2.14	105	110	0.292111	137	469	2.88618	35.5	12.3	5.5
MM	1	0	80	85	2.15	86	90	146.333	4390	30	0.45	23.4	52	2.94
MM	1	0	94	89	1.94	54.84	75	13.3333	340	25.5	1.05137	30.7	29.2	2.92
MM	1	1	71	91	2.35	288.3	70	0.0562147	199	3540	0.478562	34.6	72.3	9.74
MM	1	1	81	84	2.95	136.6	65	38.4211	4380	114	0.372093	24	64.5	3.43
MM	1	0	68	96	1.94	57.9	60	0.0443312	696	15700	0.732187	29.8	40.7	3.05
MM	1	0	75	51	2.44	366.21	140	0.0740525	254	3430	1.90496	46.1	24.2	15
MM	1	0	61	119	2.28	64.1	80	4.07609	750	184	2.40642	45	18.7	34
MM	1	1	74	84	2.04	75.29	123	225.667	6770	30	0.398293	28	70.3	7.34
MM	1	1	64	102	2.04	214.15	42	4.31894	1300	301	2.25281	40.1	17.8	5.55
MM	1	1	53	128	2.18	104.97	14	0.101212	334	3300	1.65327	32.9	19.9	1.95
MM	1	1	56	133	2.33	62.48	22	3.21716	1200	373	2.19635	48.1	21.9	6.8
MM	1	1	85	98	2.41	81	17	3.77358	600	159	2.25	36	16	3.69
MM	1	0	80	65	2.25	491	20	0.122481	158	1290	1.58594	40.6	25.6	15.5
MM	1	0	74	49	2.38	120	35	24	10200	425	0.239791	22.9	95.5	21.2
MM	1	0	82	80	2.09	84	40	0.245	98	400	0.712121	28.2	39.6	2.71
MM	1	0	75	97	2.11	68.7	38	0.12076	413	3420	0.494453	31.2	63.1	6.54
MM	1	0	37	38	2.17	113.56	36	93.3333	12600	135	0.148829	17.8	119.6	7.62
MM	1	1	70	107	1.91	61.01	35	3.36986	492	146	1.42077	26	18.3	4.91
MM	1	1	81	98	2.27	80.85	30	22.6404	4030	178	0.962779	38.8	40.3	1.58
MM	1	1	32	154	2.01	80.8	10	0.0860963	16.1	187	0.737903	18.3	24.8	2.27
MM	1	0	47	78	1.96	40.06	30	200.333	6010	30	0.905594	25.9	28.6	7.64
MM	1	1	83	77	2.1	80	76	3.42424	67.8	19.8	3.25	42.9	13.2
MM	1	1	70	129	2.11	52.44	38	2.08678	1010	484	1.46154	36.1	24.7	1.3
MM	1	1	67	93	1.87	210	140	207.599	6830	32.9	0.317664	22.3	70.2	28.4
MM	1	0	74	49	2.28	120	40	24	10200	425	0.289786	24.4	84.2	12.3
MM	1	0	71	114	2.18	71.19	41	0.108046	282	2610	0.688213	36.2	52.6	1.16
MM	1	1	69	77	2.28	636.55	140	0.0421121	97.7	2320	0.255569	21.8	85.3	20.08
MM	1	1	70	107	2.18	52.63	38	2.68675	892	332	1.49808	39.1	26.1	2.85
MM	1	1	67	112	2.3	133.2	40	0.280992	340	1210	0.897098	34	37.9	5.88
MM	1	1	79	81	1.94	114.66	45	10.6997	841	78.6	1.60116	27.7	17.3	7.62
MM	1	0	79	128	1.96	92.22	50	8.37079	1490	178	1.09603	33.1	30.2	13.87
MM	1	1	67	140	2.13	58.45	55	0.163057	256	1570	1.17949	36.8	31.2	2.46
MM	1	1	82	82	1.94	37.19	98	0.290106	519	1789	1.87742	29.1	15.5	3.48
MM	1	0	60	71	1.95	80	60	37.963	4100	108	0.290026	22.1	76.2	2.92
MM	1	0	79	43	2.69	319	40	0.000612583	1.85	3020	1.63804	26.7	16.3	6.25
MM	1	1	76	121	2.26	88	35	30.4225	2160	71	1.17059	39.8	34	4.25
MM	1	1	88	110	1.93	83.32	30	0.588785	504	856	0.898601	25.7	28.6	5.9
MM	1	1	78	69	2.3	79	75	0.236145	7.84	33.2	0.812689	26.9	33.1	5.7
MM	1	0	72	54	3.46	139	140	36.9099	8600	233	0.165698	17.1	103.2	9.95
MM	1	0	9746	42	3.13	176.2	140	0.0195122	112	5740	0.351351	28.6	81.4	7.29
MM	1	1	78	69	2.37	92	68	0.236145	7.84	33.2	0.937282	26.9	28.7	3.84
MM	1	1	79	155	2.33	109	30	3.33333	1460	438	1.07216	41.6	38.8	1.98
MM	1	0	45	47	2.33	71.1	28	0.2872	359	1250	1.60488	32.9	20.5	15
MM	1	0	85	123	2.63	107.9	14	3.46667	2600	750	0.464646	27.6	59.4	3.65
MM	1	1	90	84	2.17	822.59	81	0.0475703	186	3910	0.346314	24.9	71.9	18.73
MM	1	0	76	129	2.51	62.8	20	0.177778	80	450	1.34251	43.9	32.7	3.85
MM	1	0	53	98	2.1	55.04	134	167.66	3940	23.5	0.776447	38.9	50.1	1.34
MM	1	1	74	65	2.12	82	140	20.1014	5950	296	0.391241	26.8	68.5	2.08
MM	1	1	58	84	2.05	64	7	4.23387	420	99.2	2.25806	42	18.6	2.35
MM	1	1	79	67	1.62	85.3	25	0.133626	457	3420	0.452418	29	64.1	8.26
MM	1	1	67	79	2.54	97.5	97	0.134436	89.4	665	0.894397	41.5	46.4	1.61
MM	1	1	76	128	2.07	129.25	103	0.101702	239	2350	1.53488	26.4	17.2	6.43
MM	1	0	75	121	2.38	64.06	40	0.00220238	1.85	840	1.26538	32.9	26	3.01
MM	1	0	65	123	2.3	60.99	140	204.29	7620	37.3	1.03371	36.8	35.6	1.51
MM	1	0	66	123	2.28	50.79	45	1.19806	986	823	1.14162	39.5	34.6	0.84
MM	1	0	87	92	2.49	92	48	0.00873298	83.4	9550	0.522321	35.1	67.2
MM	1	1	74	77	1.74	67.47	93	0.2723	580	2130	0.776786	34.8	44.8	2.57
MM	1	0	81	109	2.4	59.98	13	3.43478	790	230	1.49004	37.4	25.1	0.05
MM	1	1	56	149	2.29	54.26	26	3.16207	917	290	1.25828	38	30.2	1.14
MM	1	0	76	55	2.18	85	24	42.0556	7570	180	0.381344	27.8	72.9	3.01
MM	1	0	67	123	2.17	61.43	25	33.3065	4130	124	0.775391	39.7	51.2	0.28
MM	1	0	89	74	2.18	187	28	0.0310204	228	7350	0.566038	27	47.7	8.09
MM	1	0	64	71	2.13	37.62	32	4.12308	1340	325	1.54857	27.1	17.5	1.8
MM	1	1	65	112	2.33	98	92	0.0936027	278	2970	0.733202	37.1	50.6	3.22
MM	1	0	41	104	2.29	60.24	40	0.326667	98	300	0.112983	11.4	100.9	1.39
MM	1	1	61	84	1.75	102.9	33	2.66553	781	293	1.828	45.7	25	0.48
MM	1	0	68	89	1.87	91.34	7	2.6	650	250	2.32919	37.5	16.1	1.72
MM	1	1	73	52	1.97	144.52	25	40.566	4300	106	0.148218	15.8	106.6	13.28
MM	1	1	83	69	2.1	145	140	19.5349	8.4	0.43	0.596525	30.9	51.8	3.4
MM	1	1	88	110	2.22	276	90	2.3099	1610	697	1.0467	38.1	36.4	5.95
MM	1	0	75	85	2.45	832	22	0.00299472	2.27	758	2.42593	52.4	21.6	5.8
MM	1	1	64	115	2.27	71.14	113	3.75	450	120	0.757261	36.5	48.2	3.4
MM	1	0	66	102	2.08	85	99	0.00828358	111	13400	0.251603	31.4	124.8	3.81
MM	1	1	71	91	1.98	103.13	20	117.949	5980	50.7	0.281407	22.4	79.6	0.13
MM	1	1	74	96	2.05	44.84	128	19.148	4270	223	0.352254	21.1	59.9	5.43
MM	1	1	59	113	2.36	89	61	7.14167	857	120	1.29699	34.5	26.6	1.8
MM	1	0	65	66	2.06	48.15	120	64.7368	1230	19	0.940252	29.9	31.8	4.96
MM	1	1	63	130			8	3.63043	835	230	1.72016	41.8	24.3
MM	1	0	90	60	2.02	180	140	0.0252261	5.02	199	0.407459	29.5	72.4	9.07
MM	1	1	24	88	2.25	62.85	140	36.0938	4620	128	0.812317	27.7	34.1	6.82
MM	1	1	84	63	1.77	76.13	30	93.8333	5630	60	0.423567	26.6	62.8	0.44
MM	1	1	89	72	2.08	79	59	8.46	42.3	5	0.451761	29.5	65.3	2.97
MM	1	1	68	115	2.31	107	53	2.38274	1270	533	1.42545	39.2	27.5	2.14
MM	1	1	64	132	2.22	46.8	25	4.0636	1150	283	1.68932	34.8	20.6	3.59
MM	1	1	77	70	1.89	101.45	140	188.762	9910	52.5	0.281359	32.3	114.8	8.32
MM	1	0	70	113	2.4	54.15	20	2.14744	1340	624	1.41637	39.8	28.1	3
MM	1	0	55	145	2.22	53.43	9	1.70692	1060	621	2.35915	67	28.4	8
MM	1	0	78	79	2.3	91	50	50.9333	7640	150	0.442073	29	65.6	2.43
MM	1	1	54	78	2.24	728.61	40	0.237981	495	2080	0.731132	31	42.4	10.96
light MM	1	0	80	67	2.18	380	25	90.7616	2014	22.19	1.37	32.5	23.7	22
light MM	1	0	66	85	2.27	277.9	63	5.08108	18.8	3.7	1.08	35.5	32.7	5.8
light MM	1	0	60	97	2.44	148.8	45	16.2381	68.2	4.2	1.38	35.3	25.5	12.9
light MM	1	1	71	99	3.56	202.6	40	0.00335821	36.45	10854	1.77	41.7	23.5	12.5
light MM	1	0	69	87	2.2	93.2	28	0.00655814	28.2	4300	1.5	35.1	23.4	6
light MM	1	0	64	79		154	40	10.3478	95.2	9.2	1.55	37.6	24.2	7.8
light MM	1	0	52	95	2.06	71.1	35	0.00117271	5.5	4690	1.99	38.3	19.2	10.1
light MM	1	1	57	98	2.07	87.7	30	3.58974	14	3.9	1.18	28.7	24.4	4.5
light MM	1	1	67	73	2.07	591.5	25	0.00589928	41	6950	2.03	37.7	18.6	12.5
light MM	1	1	68	70	1.68	604	28	15.6552	22.7	1.45	1.67	27.1	16.2	24.5
light MM	1	1	54	98	2.21	77.2	30	7.78998	1000	128.37	1.92	39	20.3	5
light MM	1	1	32	149	2.49	76	10	63.1579	240	3.8	2.2	49	22.3	4.2
light MM	1	1	73	82	2.12	142	30	0.230053	1.73	7.52	2.26	42.5	18.8	10
light MM	1	1	65	98	2.54	101.1	40	0.0843318	183	2170	2.5	15	37.5	13.9
light MM	1	1	62	83	2.18	542	108	8.47737	618	72.9	1.71212	45.2	26.4	15
light MM	1	1	76	90	2.12	579.8	100	0.00703747	60.1	8540	1.54	31.3	20.3	4.5
light MM	1	1	92	99	2.27	136	120	0.103581	40.5	391	1.79	37.7	21.1	3.5
light MM	1	0	58	140	2.14	73.3	25	1.48	51.8	35	1.12	33.4	29.9	4
light MM	1	0	66	119	2.13	82.6	51	2.05426	106	51.6	1.16	24.9	21.5	4.5
light MM	1	0	66	110	2.85	57.8	28	5.11696	175	34.2	1.38	35	25.3	4.6
light MM	1	1	71	60	1.88	175.5	110	5.2443	16.1	3.07	0.62	18.9	30.5	5
light MM	1	0	50	120	2.11	56.9	29	4.93653	350	70.9	0.91	28.5	31.2	8
light MM	1	1	56	113	1.86	82.5	100	5.15982	113	21.9	0.76	16.1	21.1	16.44
light MM	1	1	71	127	1.88	118.6	105	3.0445	130	42.7	0.82	22.1	26.9	18.5
light MM	1	0	87	82	2.36	154.8	15	0.267456	45.2	169	1.14	35.6	31.1	15.5
light MM	1	1	56	110	2.29	107.1	35	0.109024	44.7	410	0.89	29.1	32.6	12.5
light MM	1	1	67	104	2.24	109	45	0.025102	73.8	2940	1.94	40.9	21.1	5.5
light MM	1	0	53	121	2.28	61.3	29	0.225284	13.9	61.7	1.40927	36.5	25.9	0.2
light MM	1	1	56	121	1.92	105.2	10	5.15982	113	21.9	0.860697	17.3	20.1	16.44
light MM	1	1	56	120	2.5	159	35	0.109024	44.7	410	1.06964	38.4	35.9	4.6
light MM	1	1	72	84	2.12	347.7	20	3.81426	230	60.3	1.44388	28.3	19.6	11.5
light MM	1	1	59	115	1.95	73.3	18	0.269663	9.6	35.6	1.44149	27.1	18.8	6
light MM	1	1	57	144	2.28	70.3	25	0.536145	1.78	3.32	1.62598	41.3	25.4	2
light MM	1	0	50	134	2.19	58.6	29	1.99747	15.8	7.91	1.28079	26	20.3	2.9
light MM	1	0	66	119	2.13	82.6	51	2.05426	106	51.6	1.15814	24.9	21.5	3.5
light MM	1	0	49	91	2.19	77.7	22	0.114286	17.6	154	1.10672	28	25.3	1.1
light MM	1	0	50	120	2.12	644.5	37	0.107399	9.58	89.2	0.904918	27.6	30.5	14.5
light MM	1	0	72	85	2.15	163.9	20	0.108721	18.7	172	1.34742	28.7	21.3	27.69
light MM	1	0	61	88	2.15	41.6	27	0.313609	10.6	33.8	1.61702	30.4	18.8	58
light MM	1	1	80	115	2.19	130.6	31	1.86756	9.73	5.21	1.41319	40.7	28.8	4.6
light MM	1	1	38	103	2.04	137.1	43	0.0906667	13.6	150	0.899522	18.8	20.9	15.35
light MM	1	1	77	162	2.04	68.6		0.702847	3.95	5.62	0.96139	24.9	25.9	3.5
light MM	1	1	73	102	1.9	104.2	32	0.638393	57.2	89.6	0.853282	22.1	25.9	0.68
light MM	1	1	70	139	2.12	49.6	61	0.171564	3.62	21.1	7.96	34.9	24.4	4.7
light MM	1	0	76	127	1.85	69.7	12	0.0927273	10.2	110	10.96	17.4	27.8	2.58
light MM	1	1	68	143	2.45	85.4	10	0.667647	22.7	34	11.96	35.9	17	2.6
light MM	1	1	77	111	2.12	76.6	36	1.22581	19	15.5	12.96	35.7	29.4	3.5
light MM	1	0	58	114	40.3276	67.9	20	1.72	10	5.81	1.67586	48.6	29	2.239
light MM	1	1	62	145	16.3224	58.8	41	0.65	3.04	4.69	0.727599	20.3	27.9	3.79
light MM	1	0	65	104	23.8544	88.2	27	1.84	10.6	5.77	1.15436	34.4	29.8	6.13
light MM	1	0	73	99	15.0614	0	9	1.278	63.9	50	1.60656	29.4	18.3	2.57
light MM	1	1	78	120	4.29	61.6	10	1.866	93.3	50	1.42545	39.2	27.5	2.935
light MM	1	1	85	113	4.3	80.5	52	1.62242	11	6.78	1.24314	31.7	25.5	3.4
light MM	1	0	60	136	5.3	47.6	14	3.03797	12	3.95	1.625	45.5	28	1.59
light MM	1	1	67	62	3.7	53.508	35	17.7885	1480	83.2	0.397976	21.24	53.37	3.51
light MM	1	2	74	97	4.5	111.02	121	0.171223	190.4	1112	1.11714	35.19	31.5	8.118
light MM	1	1	77	116	4.41	47.292	107	4.30769	2688	624	0.261669	16.65	63.63	2.979
light MM	1	1	26	89	4.5	75.775	50	3.36667	808	240	1.05	39.69	37.8	3.456
light MM	1	1	91	75	4.0804	97.986	122	4.76543	1544	324	1.34259	26.1	19.44	5.355
light MM	1	2	89	76	4.5	51.52	100	0.221739	204	920	0.940945	21.51	22.86	4.14
light MM	1	2	54	65	4.5	73.5	110	0.292111	109.6	375.2	2.88618	31.95	11.07	4.95
light MM	1	2	54	83	4.2	60.2	90	146.333	3512	24	0.45	21.06	46.8	2.646
light MM	1	2	52	87	3.7636	38.388	75	13.3333	272	20.4	1.05137	27.63	26.28	2.628
light MM	1	1	87	89	5.5225	201.81	70	0.0562147	159.2	2832	0.478562	31.14	65.07	8.766
light MM	1	1	60	82	4.2	95.62	65	38.4211	3504	91.2	0.372093	21.6	58.05	3.087
light MM	1	2	64	94	3.7636	40.53	60	0.0443312	556.8	12560	0.732187	26.82	36.63	2.745
light MM	1	1	66	49	2.44	256.347	140	0.0740525	203.2	2744	1.90496	41.49	21.78	13.5
light MM	1	1	67	117	2.28	44.87	80	4.07609	600	147.2	2.40642	40.5	16.83	30.6
light MM	1	2	53	82	2.04	52.703	123	225.667	5416	24	0.398293	25.2	63.27	6.606
light MM	1	1	68	100	2.04	149.905	42	4.31894	1040	240.8	2.25281	36.09	16.02	4.995
light MM	1	2	69	126	2.18	73.479	14	0.101212	267.2	2640	1.65327	29.61	17.91	1.755
light MM	1	2	47	131	2.33	43.736	22	3.21716	960	298.4	2.19635	43.29	19.71	6.12
light MM	1	1	63	96	2.41	56.7	17	3.77358	480	127.2	2.25	32.4	14.4	3.321
light MM	1	2	61	65	2.25	343.7	20	0.122481	126.4	1032	1.58594	36.54	23.04	13.95
light MM	1	1	52	50	2.38	84	35	24	8160	340	0.239791	20.61	85.95	19.08
light MM	1	1	54	78	2.09	58.8	40	0.245	78.4	320	0.712121	25.38	35.64	2.439
light MM	1	2	67	98	2.11	48.09	38	0.12076	330.4	2736	0.494453	28.08	56.79	5.886
light MM	1	2	72	67	2.17	79.492	36	93.3333	10080	108	0.148829	16.02	107.64	6.858
light MM	1	2	74	105	1.91	42.707	35	3.36986	393.6	116.8	1.42077	23.4	16.47	4.419
light MM	1	2	50	95	2.27	56.595	30	22.6404	3224	142.4	0.962779	34.92	36.27	1.422
MGUS	1	0	65	126	2.25	163.3	45	0.284574	10.7	37.6	0.71	13.3	18.7
MGUS	1	0	58	142	2.14	73.3	25	1.30143	9.11	7	1.12	33.4	29.9
MGUS	1	0	49	110	2.26	43.1	14	1.82051	7.1	3.9	1.12	39.2	34.9
MGUS	1	1	85	67	1.82	491	19	1.95616	93.7	47.9	1.18	36.6	30.9	1.9
MGUS	1	1	62	129	2.21	80.2	20	0.127778	2.99	23.4	1	34.5	34.5	2.16
MGUS	1	0	74岁	114	2.39	84.8	27	0.434	5.47	12.6	1.04	39	37.6	4.5
MGUS	1	1	82	108	2.13	72.1	59	4.11834	195.58	47.49	1.13	30.4	26.8	122.17
MGUS	1	0	56	76	1.87	555.3	4	0.320652	59	184	1.01	27.2	27	56.6
MGUS	1	1	66	126	2.13	75.6	45	9.11252	575	63.1	0.93	32.9	35.5	45.6
MGUS	1	0	64	82	1.8	488.9	5	4.04132	48.9	12.1	1.01	31.2	30.8	4.5
MGUS	1	1	49	118	2.44	205	12	3.18182	94.5	29.7	1.52	45	29.7	4.5
MGUS	1	1	73	99	2.36	196.6	56	3.7884	11.1	2.93	1.5	38.1	25.4	4.5
MGUS	1	1	48	80	2.11	261	45	3.26339	7.31	2.24	1.14	30.3	26.5	7.6
MGUS	1	1	82	97	1.92	209	11	7.38235	251	34	0.89	25.6	28.9	8.9
MGUS	1	0	86	116	2.02	50.6	59	5.5122	113	20.5	0.75	28.2	37.7	3
MGUS	1	1	77	99	2.67	91.6	18	17.9668	43.3	2.41	0.99	40.5	40.8	2.5
MGUS	1	1	67	90	2.38	207.6	35	12.439	20.4	1.64	0.85	31.6	37	2.8
MGUS	1	1	80	90	2.16	182.4	45	3.97172	309	77.8	1.23	29.1	23.6	3
MGUS	1	1	72	68	2.31	691	12	2.1949	278.05	126.68	0.53	24.1	45.4	6.7
MGUS	1	1	78	101	1.95	467.1	10	1.82	140	76.8	1.53	20.5	16.5	42.07
MGUS	1	0	45	130	1.86	82.6	22	0.395556	3.56	9	1.6	41.4	25.9	5.9
MGUS	1	0	38	127	1.88	57.8	13	0.893	8.93	10	1.88	39	20.8	2.7
MGUS	1	0	30	140	2.36	165	25	2.45455	27.0	11	0.83	42	50.5	3.3
MGUS	1	1	45	141	2.29	56.9	26	2.09167	25.1	12	1.28	37.1	28.9	2.7
MGUS	1	0	43	142	2.24	82.5	18	0.807692	10.5	13	0.65	33.2	51.4	2.7
MGUS	1	1	37	143	2.65	118.6	34	0.764286	10.7	14	2.03	45.2	22.3	6.44
MGUS	1	0	50	135	2.17	154.8	12	5.21333	78.2	15	0.98	32.1	32.9	4.3
MGUS	1	0	55	132	2.33	107.1	2	0.258125	4.13	16	1.05	33.3	31.7	13.8
MGUS	1	1	65	120	2.27	109	4	0.411765	7.0	17	0.91	41	45.2	4.4
MGUS	1	1	64	128	2.48	75.6	5	0.511111	9.2	18	1.17	37.9	32.5	4.5
MGUS	1	0	60	130	2.45	145	6	0.187368	3.56	19	0.76	27.7	36.5	2.69
MGUS	1	1	59	130	2.29	109	7	0.3525	7.05	20	1.4	29.4	21	7.5
MGUS	1	0	55	126	2.24	75.6	8	5.14286	108	21	1.62	36.6	22.6	2.5
MGUS	1	0	69	120	2.25	474	9	1.56818	34.5	22	1.77	36.3	20.5	4.1
MGUS	1	1	70	125	2.17	62.9	10	2.51304	57.8	23	0.29	29.7	101.1	3.5
MGUS	1	0	71	130	2.33	77.1	11	1.17083	28.10	24	0.52	29.6	57	4.3
MGUS	1	0	45	140	2.19	152.9	4	0.5	12.5	25	0.59	31.1	52.6	5.6
MGUS	1	1	33	129	2.19	82.6	3	1.85769	48.3	26	0.61	36.1	59.5	2.67
MGUS	1	0	27	128	2.04	91.7	12	0.996296	26.9	27	1.2	39.4	32.6	3.5
MGUS	1	1	30	125	2	150	34	0.960714	26.9	28	2.21	45.6	30.4	3.6
MGUS	1	0	45	42.3	2.106	112.95	54	0.2872	323.1	1125	3.21	30.685	17.085	6.63
MGUS	1	0	72	70.2	3.582	249.3	63	0.127301	373.5	2934	4.21	27.03	23.205	9.2395
MGUS	1	1	73	57.6	2.016	77.814	49.5	255.696	9090	35.55	5.21	19.21	74.885	4.76
MGUS	1	1	74	81.9	2.052	100.8	54	3.46067	277.2	80.1	5.5	30.855	39.525	2.227
MGUS	1	0	78	49.5	1.863	47.79	141.3	0.21342	443.7	2079	6.5	28.22	34	6.885
MGUS	1	1	60	98.1	1.8	43.497	40.5	27.3913	3402	124.2	7.5	36.975	38.165	2.074
MGUS	1	0	80	0	1.989	72.9	31.5	0.0666667	27	405	8.5	19.72	68	4.76
MGUS	1	1	66	60.3	2.502	116.1	18	79.3323	4491	56.61	9.5	23.715	71.4	9.095
MGUS	1	1	76	99.9	2.124	121.5	108	2.43289	652.5	268.2	10.5	24.225	47.26	8.16
MGUS	1	0	62	68.4	1.962	99.81	139.5	0.0311475	85.5	2745	11.5	23.715	48.705	3.825
MGUS	1	1	64	82.8	1.971	162	9.9	0.29	78.3	270	12.5	32.3	42.67	13.6
MGUS	1	1	58	59.4	1.881	165.726	13.5	0.00457971	56.88	12420	13.5	18.02	84.49	9.4435
MGUS	1	0	78	44.1	1.863	47.817	141.3	0.21342	443.7	2079	14.5	24.395	24.31	3.825
MGUS	1	1	47	89.1	1.809	64.845	13.5	808	3636	4.5	15.5	29.155	18.955	6.1795
MGUS	1	0	71	115.2	2.16	53.613	67.5	0.118529	391.5	3303	16.5	27.88	24.65	2.0145
MGUS	1	0	84	109.8	2.052	102.6	30.6	0.0846154	267.3	3159	17.5	32.045	41.395	5.3125
MGUS	1	1	75	88.2	1.746	50.058	24.3	0.211462	481.5	2277	18.5	21.25	38.93	1.785
MGUS	1	1	80	75.6	1.899	104.31	36	0.293275	792	2700.54	19.5	33.83	19.89	4.165
MGUS	1	0	76	71.1	2.034	644.4	20.7	0.00569231	1.665	292.5	20.5	30.77	15.3	12.75
MGUS	1	0	76	73.8	2.034	408.15	50.4	0.288043	238.5	828	21.5	41.735	18.785	12.75
MGUS	1	0	73	62.1	1.647	60.129	54	126	567	4.5	22.5	10.455	86.7	27.88
MGUS	1	0	90	79.2	1.629	51.021	40.5	16.1318	5067	314.1	23.5	16.405	42.415	7.6245
MGUS	1	0	69	126.9	2.016	64.152	60.3	5.33482	2151	403.2	24.5	36.55	21.675	1.5725
MGUS	1	0	71	73.8	1.827	72.054	31.5	0.231841	419.4	1809	25.5	25.16	42.5	3.6295
MGUS	1	1	64	73.8	2.502	70.497	125.1	104.585	6570	62.82	26.5	25.925	51.17	3.791
MGUS	1	0	83	97.2	2.052	50.04	58.5	23.3871	261	11.16	27.5	30.345	22.44	3.315
MGUS	1	1	86	86.4	2.196	63.765	9	1.91201	1017	531.9	28.5	29.835	22.95	1.921
MGUS	1	0	75	116.1	1.926	37.836	126	0.139702	506.7	3627	29.5	16.065	17.765	1.8955
MGUS	1	0	81	49.5	2.214	199.458	63	39.9541	3132	78.39	30.5	16.575	17.425	3.825
MGUS	1	1	57	116.1	1.917	58.644	8.1	4.29348	1422	331.2	31.5	33.235	34.17	1.3685
MGUS	1	0	85	65.7	2.016	50.058	40.5	102.523	6948	67.77	32.5	19.465	63.155	8.823
MGUS	1	1	91	100.8	2.16	89.919	36	0.412752	553.5	1341	33.5	31.705	29.325	3.7995
MGUS	1	1	81	72	1.593	45.666	35.1	10.1087	1674	165.6	34.5	22.185	24.055	2.5245
MGUS	1	1	76	97.2	2.061	100.278	49.5	0.125373	226.8	1809	35.5	33.065	34.425	5.95
MGUS	1	1	64	128.7	1.971	58.5	18	23.743	3825	161.1	36.5	34	39.1	1.938
MGUS	1	1	79	97.2	1.854	55.296	22.5	3.57143	2250	630	37.5	23.885	28.9	4.1565
MGUS	1	1	79	81.9	1.935	92.592	27	3.55191	585	164.7	38.5	33.49	19.89	4.3945
MGUS	1	0	12	124.2	2.241	79.2	7.2	0.0889423	1.665	18.72	39.5	29.41	22.95	5.338
MGUS	1	0	74	132.3	1.818	84.213	31.5	271.667	7335	27	40.5	28.39	62.985	6.222
MGUS	1	1	79	76.5	2.358	74.772	27	0.0452381	153.9	3402	41.5	17.425	74.035	10.1235
MGUS	1	1	67	104.4	1.773	94.149	36	3.35	603	180	42.5	31.365	16.32	2.703
MGUS	1	1	73	67.5	1.998	88.965	34.2	0.085879	268.2	3123	43.5	25.755	48.875	4.4455
MGUS	1	1	60	94.5	2.016	67.239	31.5	4.34483	453.6	104.4	44.5	31.195	19.805	5.3125
MGUS	1	1	87	75.6	1.737	48.438	19.8	10.1053	1728	171	45.5	30.175	26.265	4.1395
MGUS	1	1	70	72	2.124	86.4	126	2.09346	1008	481.5	46.5	25.67	18.53	3.6635
MGUS	1	1	92	84.6	2.124	106.929	115.2	4.82546	2115	438.3	47.5	31.79	32.215	17.187
MGUS	1	0	62	97.2	1.971	44.451	36	0.233333	315	1350	48.5	36.55	17	1.598
MGUS	1	1	79	78.3	1.872	146.7	31.5	0.0510363	177.3	3474	49.5	25.925	36.635	8.279
MGUS	1	0	63	112.5	1.971	48.951	27	0.289902	80.1	276.3	50.5	36.635	21.08	0.9095
MGUS	1	1	50	48.6	2.142	665.406	85.5	19.2641	4005	207.9	51.5	32.13	41.225	13.9995
MGUS	1	1	69	54.9	2.367	68.796	31.5	17.7885	1665	93.6	52.5	20.06	50.405	3.315
MGUS	1	0	88	85.5	2.016	142.74	108.9	0.171223	214.2	1251	53.5	33.235	29.75	7.667
MGUS	1	1	74	106.2	1.764	60.804	96.3	4.30769	3024	702	54.5	15.725	60.095	2.8135
MGUS	1	0	79	93.6	2.196	97.425	45	3.36667	909	270	55.5	37.485	35.7	3.264
MGUS	1	1	80	69.3	1.818	125.982	109.8	4.76543	1737	364.5	56.5	24.65	18.36	5.0575
MGUS	1	0	71	70.2	2.034	66.24	90	0.221739	229.5	1035	57.5	20.315	21.59	3.91
MGUS	1	0	86	60.3	1.926	94.5	99	0.292111	123.3	422.1	58.5	30.175	10.455	4.675
MGUS	1	0	80	76.5	1.935	77.4	81	146.333	3951	27	59.5	19.89	44.2	2.499
MGUS	1	0	94	80.1	1.746	49.356	67.5	13.3333	306	22.95	60.5	26.095	24.82	2.482
MGUS	1	1	71	81.9	2.115	259.47	63	0.0562147	179.1	3186	61.5	29.41	61.455	8.279
MGUS	1	1	81	75.6	2.655	122.94	58.5	38.4211	3942	102.6	62.5	20.4	54.825	2.9155
MGUS	1	0	68	86.4	1.746	52.11	54	0.0443312	626.4	14130	63.5	25.33	34.595	2.5925
MGUS	1	0	75	45.9	2.196	329.589	126	0.0740525	228.6	3087	64.5	39.185	20.57	12.75
MGUS	1	0	61	107.1	2.052	57.69	72	4.07609	675	165.6	65.5	38.25	15.895	28.9
MGUS	1	1	74	75.6	1.836	67.761	110.7	225.667	6093	27	66.5	23.8	59.755	6.239
MGUS	1	1	64	91.8	1.836	192.735	37.8	4.31894	1170	270.9	67.5	34.085	15.13	4.7175
MGUS	1	1	53	115.2	1.962	94.473	12.6	0.101212	300.6	2970	68.5	27.965	16.915	1.6575
POEMS	1	1	38	178	2.49	81.5	15	0.639281	4.98	7.79	1.81	39.6	21.9	4.3
POEMS	1	1	54	122	2.2	77.5	9	10.0546	184	18.3	1.3	36	27.7	4.9
POEMS	1	0	50	114	2.24	68.1	23	4.89305	183	37.4	1.6	34	21.8	2.63
SPB	1	1	55	103	2.29	95.3	120	19.8592	28.2	1.42	0.66	31.6	48.2	3
SPB	1	2	56	99	56.4	2.3	45	16.5882	56.4	3.4	1.66	32	49.5	3.5
LPL/ WM	1	0	75	64	3.29	140.9		3.55224	23.8	6.7	1.22	25	20	3.32
LPL/ WM	1	0	72	65	1.89	67.5		3.88889	35	9	1.19	33.3	28.4	5
LPL/ WM	1	0	61		2.21	67.2		7.225	28.9	4	1.055	32.6	30.9	7.3
LPL/ WM	1	0	51	174	2.34	81.1		0.104918	12.8	122	1.34	41.3	30.9	2.63
LPL/ WM	1	0	76	74	2.17	84.5	120	5.16	25.8	5	0.7	31.5	44.8	3
LPL/ WM	1	0	69	134	2.39	88.4		10.7558	18.5	1.72	0.97	39.6	41	3.5
LPL/ WM	1	0	61	110	2.32	75.3	97	8.65	38.1	4.45	0.54	33.8	62.3	3.5
LPL/ WM	1	1	71	98	2.23	290		0.104918	12.8	122	1.11	34.7	31.4
LPL/ WM	1	0	55	56	2.51	123		9.41176	33.6	3.57	0.74	36.2	49.1	3.65
LPL/ WM	1	0	79	76	2.02	102.4		3.75	16.5	4.4	0.88	26.4	29.9
LPL/ WM	1	0	78	103	2.45	92	120	4.82222	21.7	4.5	0.7	28.2	40.5
LPL/ WM	1	0	69	123	2.33	68.4		0.498477	4.91	9.85	1.36	38.6	28.4	3.94
LPL/ WM	1	0	75	62	2.1	68.6		5.70297	57.6	10.1	0.44	27.3	61.7	7.2
LPL/ WM	1	1	73	57	2.22	112.5		5.65495	17.7	3.13	0.72	27.4	38.2
LPL/ WM	1	0	73	92	2.27	303.6	45	8.50575	22.2	2.61	1.03	37.1	36	7.3
LPL/ WM	1	1	64	68	2.08	50.6		0.544365	4.54	8.34	0.94	29.6	31.4	6.5
LPL/ WM	1	1	69	34	2.14	56.4		3.29621	14.8	4.49	1.43	34.7	24.2	5.5
LPL/ WM	1	0	65	71	1.9	67.9		1.37778	12.4	9	1.17	27.9	23.8	3.2
LPL/ WM	1	0	74	111	2.26	68.4	24	15.4783	35.6	2.3	1.38	35.2	25.5	3.3
LPL/ WM	1	0	65	149	2.37	87.3	2	8.16279	35.1	4.3	1.62	44.9	27.8	3.4
LPL/ WM	1	0	57	137	1.91	88.6		2.12082	165	77.8	0.54	19.3	36	3.6
LPL/ WM	1	1	64	109	2.13	49.3	86	0.212568	3.89	18.3	0.83	32.7	39.3	4.5
LPL/ WM	1	1	58	100	2.21	40.2		0.063871	2.97	46.5	0.48	26.3	54.7	2.8
LPL/ WM	1	1	55	120	2.23	91.5	15	1.45833	3.5	2.4	0.719665	34.4	47.8	2.5
LPL/ WM	1	0	84	148	2.12	78	18	3.63	11.4	3.14	1.49237	39.1	26.2	2.275
LPL/ WM	1	1	74	98	2.17	89	15	4.4	220	50	0.646934	30.6	47.3	2.41
LPL/ WM	1	1	60	56	2.03	78	10	7.92982	22.6	2.85	0.788372	33.9	43	2.42
LPL/ WM	1	1	65	145	2.27	124	16	4.16425	8.62	2.07	1.87168	42.3	22.6	3.752
LPL/ WM	1	0	65	82	2.04	67	25	0.111957	4.12	36.8	0.446634	27.2	60.9	2.75
LPL/ WM	1	0	62	110	2.37	86	46	2.391	6.91	2.89	1.99554	44.7	22.4	2.913
LPL/ WM	1	1	64	98	2.14	112	30	26.9737	41	1.52	0.4384	27.4	62.5	6.344
LPL/ WM	1	1	68	67	2.1	76	24	12.5	28	2.24	0.692494	28.6	41.3	3.45
LPL/ WM	1	0	75	87	2.41	560	45	5.14925	34.5	6.7	0.538462	35	65	7.5
LPL/ WM	1	1	80	48	2.37	73.1	12	4	36	9	0.386667	29	75	6.5
LPL/ WM	1	1	72	100	2.95	59.1	10	7.25	29	4	0.997783	45	45.1	5.5
LPL/ WM	1	1	24	99	2.87	291	22	0.118852	14.5	122	1.24286	43.5	35	10.18
LPL/ WM	1	1	76	90	2.07	609	13	5.3	26.5	5	0.608456	33.1	54.4	4.7
LPL/ WM	1	1	49	93	2.38	416	25	11.3372	19.5	1.72	1.32231	80	60.5	3.1
LPL/ WM	1	1	34	88	2.3	164	26	8.78652	39.1	4.45	0.473022	26.3	55.6	3.7
LPL/ WM	1	1	85	82	2.28	71	18	0.107377	13.1	122	1.2069	35	29	3.58
LPL/ WM	1	1	78	87	2.49	259	34	9.69188	34.6	3.57	0.644444	29	45	24.3
LPL/ WM	1	0	53	125	1.74	63.6	12	3.97727	17.5	4.4	1	34	34	7.95
LPL/ WM	1	0	60	93	2.4	592	2	5.22222	23.5	4.5	0.31362	17.5	55.8	20.19
LPL/ WM	1	1	73	105	2.29	39.7	4	0.679188	6.69	9.85	1.77778	40	22.5	6.2
LPL/ WM	1	0	68	88	2.18	188.1	5	5.83168	58.9	10.1	1.20915	37	30.6	15.2
LPL/ WM	1	0	51	85	2.17	121.8	6	6.35783	19.9	3.13	0.379616	25.7	67.7	6.2
LPL/ WM	1	1	79	73	2.18	82.2	7	9.00383	23.5	2.61	0.943355	43.3	45.9	4.5
LPL/ WM	1	1	72	110	2.13	164.5	8	0.664269	5.54	8.34	0.308081	24.4	79.2	13.52
LPL/ WM	1	0	70	102	2.33	51.3	9	3.47439	15.6	4.49	1.11465	35	31.4	8.8
LPL/ WM	1	1	58	82	2.29	59.4	10	6.70498	17.5	2.61	0.673585	35.7	53	11.87
LPL/ WM	1	0	44	87	1.75	46.6	11	2.21823	18.5	8.34	0.95	38	40	6.6
LPL/ WM	1	0	72	54	1.87	50.4	4	10.0445	45.1	4.49	0.825714	28.9	35	3.62
LPL/ WM	1	1	47	71	1.97	93.4	3	2.28792	178	77.8	1	35	35	9.1
LPL/ WM	1	0	64	108	2.45	270.2	140	0.321858	5.89	18.3	0.25	35	140	3.44
LPL/ WM	1	1	70	83	2.29	383.5	90	0.076129	3.54	46.5	1.05975	33.7	31.8	6.5
LPL/ WM	1	1	56	113	2.24	78.7	22	0.0826923	4.3	52	0.492611	30	60.9	11.7
LPL/ WM	1	0	92	100	2.25	69.3	113	3.26087	13.5	4.14	1.33891	32	23.9	10.6
LPL/ WM	1	1	63	93	2.17	160.5	99	4.09259	221	54	0.705305	35.9	50.9	5.5
LPL/ WM	1	1	79	98	2.33	106.1	20	5.94458	23.6	3.97	1.14754	35	30.5	17
LPL/ WM	1	1	74	110	2.19	82.2	128	3.14332	9.65	3.07	0.638298	45	70.5	12.11
LPL/ WM	1	1	74	68	2.19	54.8	61	0.136533	5.12	37.5	0.677778	30.5	45	5.5
LPL/ WM	1	0	68	128	2.04	111.42	120	1.9563	7.61	3.89	0.920635	40.6	44.1	8.27
LPL/ WM	1	1	65	46	2	65	8	17.0635	43	2.52	2.58065	40	15.5	4.37
LPL/ WM	1	1	34	69	2.3	61.44	140	9.25926	30	3.24	0.671642	45	67	3.14
LPL/ WM	1	0	64	65	4.57	102.88	140	11.7647	40	3.4	0.444444	20	45	4.59
LPL/ WM	1	1	66	56	2.06	88	30	10.8696	45	4.14	1.45318	38.8	26.7	9.32
LPL/ WM	1	0	70	95	2.23	93.57	59	0.3	16.5	55	0.975904	40.5	41.5	4.5
LPL/ WM	1	0	51	137	1.92	83.08	53	5.06494	19.5	3.85	0.803571	45	56	9.5
LPL/ WM	1	1	48	90	2.31	104.61	25	6.67752	20.5	3.07	0.573333	25.8	45	3.43
LPL/ WM	1	0	53	49	2.38	58.8	140	1.14815	46.5	40.5	0.201613	25	124	11.96
LPL/ WM	1	1	58	80	2.22	187	20	46.2725	180	3.89	1.28571	45	35	10.45
LPL/ WM	1	1	67	66	2.33	110	9	3.945	7.89	2	0.722857	25.3	35	8.45
LPL/ WM	1	1	68	89	2.31	72.1	50	2.47321	5.54	2.24	0.92228	35.6	38.6	8.5
LPL/ WM	1	0	52	57	2.17	209.9	34	4.14474	6.3	1.52	2.7619	29	10.5	13.05
LPL/ WM	1	1	79	107	1.88	87.41	50	6.91964	15.5	2.24	0.129538	28.9	223.1	7.5

## Sheet: control group
diagnosis	plasma cell dyscrasias1,Non-plasma cell dyscrasias0	sex （female0/male 1)	age	HGB	Serum calcium	Serum creatinine	ESR	light chain κ/λ ratio	light chain κ	light chain λ	Albumin/globulin ratio	Albumin	globulin	β2 -microglobulin
Aberrant globulin	0	1	58	115	2.1	69.5	45	1.3576	6.34	4.67	1.59	37.1	23.3	2
herniated disk	0	1	46	166	2.37	82.5	3	1.70152	8.95	5.26	1.55052	44.5	28.7	2.1
hepatic insufficiency	0	0	50	125	2.14	44.8	10	1.2767	5.26	4.12	1.10588	37.6	34	1.1
Chronic kidney disease stage 5	0	1	56	83	1.81	766.9	12	1.68072	55.8	33.2	1.95906	33.5	17.1	16.5
Type 2 diabetes	0	1	62	105	2.29	145.2		1.1978	10.9	9.1	1.69076	42.1	24.9	2.1
Polyclonal Promaglobulin	0	1	60	112	2.12	45	21	2.07607	13.1	6.31	1.28571	45	35	1.4
Diabetes mellitus with multiple diseases illness	0	1	53	71	2	679.9	59	1.60584	6.6	4.11	1.27848	30.3	23.7	1.2
Greenbari syndrome	0	1	55‘	159	2.19	64.3	2	2.05036	11.4	5.56	0.987147	38.4	38.9	1.6
nephroma	0	1	44	107	2.09	70.7	105	0.684385	20.6	30.1	0.679803	27.6	40.6	1.2
renal inadequacy	0	1	63	138	2.31	94.1	56	0.828767	12.1	14.6	0.945409	38.1	40.3	2.1
cerebrovascular disease	0	1	82	113	1.94	100	23	0.92	2.3	2.5	0.795139	22.9	28.8	1.4
hepatic insufficiency	0	1	54	148	2.54	96.8	20	1.86795	11.6	6.21	1.51282	47.2	31.2	1.6
cholecystitis	0	0	69	81	2.07	785.4	12	0.555556	2.5	4.5	0.996988	33.1	33.2	2.1
nephroma	0	1	53	154	2.35	72	34	1.84615	7.2	3.9	1.76305	43.9	24.9	2
renal inadequacy	0	1	72	120	2.28	148.8	46	4.20635	10.6	2.52	1.31855	32.7	24.8	2.1
lumbago	0	0	38	106	2.14	156.2	17	2.10917	9.66	4.58	1.45528	35.8	24.6	1.9
albuminuria	0	1	58	116	2.26	74	25	1.41253	5.41	3.83	1.86432	37.1	19.9	1.8
Hypoproteinemia	0	1	74	151	1.77	96.4	19	0.576923	4.5	7.8	0.594017	13.9	23.4	1.4
acute renal failure	0	1	77	135	2.29	277.5	47	4.51282	17.6	3.9	1.17647	40	34	2.4
diabetes mellitus	0	1	69	164	2.28	70.7	38	2.26316	12.9	5.7	1.32472	35.9	27.1
Arm plexus Yan	0	0	67	112	2.45	90	21	1.7377	10.6	6.1	1.39568	38.8	27.8	3.5
renal inadequacy	0	0	65	73	2.11	82.9	28	0.70303	9.28	13.2	0.988372	34	34.4	4.5
renal inadequacy	0	0	55	113	2.09	69.9	34	2.53804	4.67	1.84	1.71098	29.6	17.3	4.7
Type 2 diabetes	0	1	50	61	2.08	756.5	21	0.778325	158	203	1.31507	28.8	21.9	4.5
renal inadequacy	0	1	76	137	2.14	221.4	19	1.54545	81.6	52.8	1.29286	36.2	28	2.4
acute renal failure	0	0	68	73	1.91	338.6	20	0.790164	24.1	30.5	1.5082	36.8	24.4	1.9
connective tissue disease	0	0	49	104	2.02	32.3	69	1.68	12.6	7.5	0.919255	29.6	32.2	1.7
Undifferentiated connective group disease	0	0	66	127	2.28	67	25	1.08403	25.8	23.8	0.827511	37.9	45.8	1.5
peripheral nerve disease	0	1	66	156	2.35	65.2	14	1.11607	12.5	11.2	1.55556	43.4	27.9	1.5
toxuria	0	1	80	74	2.02	1018	89	1.07843	11	10.2	0.874317	32	36.6	2
High blood pressure level 3	0	1	77	120	2.03	280.7	24	0.866667	15.6	18	1.20134	35.8	29.8	2.5
nephroma	0	0	61	104	2.29	5.1	27	0.818182	13.5	16.5	1.89604	38.3	20.2	3.5
Dry syndrome	0	0	35	124	2.41	55.8	17	0.836735	20.5	24.5	1.34104	46.4	34.6	2.1
Chronic kidney disease stage 5	0	0	75	110	2.34	97.4	15	1.01639	12.4	12.2	1.4129	43.8	31	1.9
peripheral nerve disease	0	0	65	120	2.36	178	3	1.22759	35.6	29	1.22271	56	45.8	2
Aberrant globulin	0	0	36	101	2.21	77.5	75	2.07407	28	13.5	0.854945	38.9	45.5	2.1
nephroma	0	0	85	81	2.84	353		1.94175	10	5.15	1.38014	40.3	29.2	4.5
numbness of limb	0	0	51	143	2.32	63.7	15	1.34247	9.8	7.3	1.48582	41.9	28.2	1.1
Aberrant globulin	0	1	43	136	2.26	71.3	25	0.0235385	7.65	325	2.1976	36.7	16.7	3.1
Chronic kidney disease stage 5	0	1	54	99	2.31	316.9	21	1.97309	13.2	6.69	1.34432	36.7	27.3	3.2
hepatic adipose infiltration	0	1	34	156	2.38	85.4	10	1.48571	15.6	10.5	1.71161	45.7	26.7	1
chronic renal failure	0	0	57	134	2.28	74.9	17	1.81928	7.55	4.15	1.81897	42.2	23.2	1.2
hypertension	0	1	56	154	2.27	102.8	15	0.719512	23.6	32.8	1.47331	41.4	28.1	2.7
tumor of spine	0	0	75	82	2.14	81.9	10	1.46507	7.97	5.44	1.49071	40.1	26.9	2.1
Aberrant globulin	0	0	36	101	2.21	77.5	75	2.07407	28	13.5	0.854945	38.9	45.5	2
peripheral nerve disease	0	0	60	115	2.23	51.4	20	1.62202	10.9	6.72	1.31373	40.2	30.6	1.9
Increased blood creatinine	0	0	88	120	2.22	95.8	25	1.56433	10.7	6.84	1.03175	32.5	31.5	2.2
disseminated sclerosis	0	0	22	121	2.3	48.6	15	1.125	9	8	1.69636	41.9	24.7	2.3
Treatment of malignant tumors	0	1	84	125	2.3	117.2	45	1.80392	18.4	10.2	0.922306	36.8	39.9	1
renal inadequacy	0	1	63	96	2.1	285.6	20	0.645161	2	3.1	1.47266	37.7	25.6	2.1
renal inadequacy	0	1	54	100	2.22	138.3	15	2.3908	10.4	4.35	1.62731	44.1	27.1	1.8
pneumonia	0	1	79	106	2.06	93.3	12	0.818182	4.5	5.5	1.27076	35.2	27.7	2.1
Thoracic lesions	0	1	52	150	2.3	63.4	11	1.93069	7.8	4.04	1.88312	43.5	23.1	1.9
albuminuria	0	1	71	146	2.27	76.2	4	1.71275	9.54	5.57	1.764	44.1	25	2.4
Undifferentiated joint Yan bone disease	0	0	62	99	2.36	82.6	28	1.08403	7.74	7.14	1.4657	40.6	27.7	4.8
chronic renal insufficiency	0	0	74	120	2.16	190.1	23	1.16638	6.87	5.89	1.59307	36.8	23.1	2.2
peripheral nerve disease	0	0	70	107	2	47.4	22	0.88764	7.9	8.9	0.936102	29.3	31.3	2.3
pneumonia	0	0	64	112	2.31	68.6	14	0.973214	10.9	11.2	1.30864	42.4	32.4	2.1
dropsical nephritis	0	0	52	120	1.86	70.6	5	0.910569	11.2	12.3	0.857843	17.5	20.4	2
nephroma	0	1	68	119	2.31	104	12	0.913043	10.5	11.5	1.48828	38.1	25.6	1.9
chronic renal failure	0	0	75	117	2.36	165	21	2.625	14.7	5.6	1.2381	39	31.5	2
Chronic kidney disease	0	0	70	110	2.15	67.2	92	1.65799	8.92	5.38	1.15926	31.3	27	0.2
amyasthenia	0	1	69	147	2.21	63.2	10	0.911504	10.3	11.3	1.38148	37.3	27	0.3
hepatic insufficiency	0	0	33	125	2.24	48.4	29	1.05882	9	8.5	1.29021	36.9	28.6	0.6
Chronic kidney disease	0	1	76	143	2.23	113	10	1.05263	10	9.5	1.32	42.5	32.3	1.5
renal inadequacy	0	0	79	109	2.23	154	4	0.733333	11	15	1.52212	34.4	22.6	1.2
Chronic kidney disease	0	1	74	87	2.13	264.6	10	1.38462	9.36	6.76	1.28302	34	26.5	1.4
albuminuria	0	0	37	129	2.25	50.7	5	0.84	10.5	12.5	1.35897	37.1	27.3	1.2
Dry syndrome	0	0	74	108	2.15	70.3	82	0.83871	15.6	18.6	0.693277	33	47.6	0.9
Mandatory spinal Yan	0	1	58	143	2.4	66.4	63	1.1573	10.3	8.9	1.21818	40.2	33	1.2
peripheral nerve disease	0	1	67	143	2.23	64.8	25	1.87845	10.2	5.43	1.43478	36.3	25.3	0.9
renal inadequacy	0	1	74	119	2.23	226.6	28	0.939394	15.5	16.5	1.24606	39.5	31.7	2.1
nephroma	0	0	62	124	2.29	51.8	30	2.32081	80.3	34.6	1.04494	37.2	35.6	1.9
And ANCA-associated nephritis	0	0	28	94	2.22	121	63	1.45386	11.5	7.91	0.893491	30.2	33.8	1.8
Chronic kidney disease yan	0	0	81			42.7	2	1.55349	6.68	4.3	1.82743	41.3	22.6	3.5
uronephrosis	0	0	54	111	2.32	69.6	5	0.947368	18	19	1.12846	44.8	39.7	1.5
albuminuria	0	0	30	95	2.19	43.2	20	0.889362	20.9	23.5	1.08	29.7	27.5	2.3
Chronic nephritis syndrome	0	0	50	134	2.51	77	45	1.19394	19.7	16.5	1.72015	46.1	26.8	2.25
Kidney disease department	0	0	73	102	2.44	576.8	56	0.956522	11	11.5	1.51982	34.5	22.7	2.3
Malignant target tumor therapy	0	1	64	113	2.19	87.8	30	1.67056	7.15	4.28	1.42972	35.6	24.9	2.2
Acute kidney damage	0	1	68	151	2.45	55.7	15	0.6	4.5	7.5	1.38796	41.5	29.9	2.1
chronic nephritis	0	0	37	126	2.37	61	16	0.794118	10.8	13.6	1.2093	41.6	34.4	2
herniated disk	0	1	67	156	2.32	69.1	33	1.55148	11	7.09	1.44444	41.6	28.8	1.9
renal inadequacy	0	1	60	104	2.05	302.5	10	0.957317	15.7	16.4	1.8866	36.6	19.4	2
spinal osteoartrosis	0	0	70	114	2.35	62.7	88	0.942935	34.7	36.8	1.17045	41.2	35.2	2.1
renal inadequacy	0	1	57	150	2.31	108.9	20	0.975342	35.6	36.5	1.35897	37.1	27.3	2.2
renal failure	0	0	73	98	2.45	494.5	108	0.881295	24.5	27.8	1.125	31.5	28	1.9
Dry syndrome	0	0	63	135	2.49	54.7	35	0.640327	23.5	36.7	1.34954	44.4	32.9	2
myocardiosis	0	1	74	131	2.17	64.2	14	0.801354	35.5	44.3	1.13681	34.9	30.7	1.7
numbness of limb	0	1	74	130	2.45	77.6	15	0.923077	24	26	1.57143	38.5	24.5	1.9
hydroncus	0	0	60	96	2.15	68.9	109	1.31193	14.3	10.9	1.32669	33.3	25.1	2.1
acute renal insufficiency	0	0	63	112	2.2	68	45	0.947826	10.9	11.5	2.0765	38	18.3	2.2
arthritis deformans	0	0	86	88	2.14	105	75	1.05882	9	8.5	0.696891	26.9	38.6	2.3
cerebral infarction	0	1	73	110	2.56	78.5	15	0.9	13.5	15	0.703786	31.6	44.9	1.9
Parkinson	0	1	56	107	2.08	68.3	4	2.14396	8.34	3.89	0.703786	28.7	22	2
Acute kidney damage	0	1	94	90	2.18	156.4	7	0.794872	12.4	15.6	1.30455	38.5	1.65	2
interstitial nephritis	0	1	70	117	2.2	221	49	0.983333	11.8	12	1.27547	33.8	26.5	2.3
albuminuria	0	1	15	120	2.28	79.6	12	1.10744	13.4	12.1	1.27547	45	20	1.8
acute renal failure	0	1	73	81	1.99	878.3	11	0.907692	17.7	19.5	1.49	35.4	23.7	2.9
chronic renal insufficiency	0	1	75	122	2.1	242.1	10	0.940299	18.9	20.1	1.77674	38.2	21.5	5.6
Chronic nephritis syndrome	0	0	59	90	2.21	765.5	14	0.949309	20.6	21.7	1.30714	36.6	28	18.6
hyperkalemia	0	1	85	116	2.29	189.9	44	1.04202	12.4	11.9	1.06044	38.6	36.4	4.5
Chronic kidney disease stage 5	0	0	94	100	2.16	658.3	12	0.827309	20.6	24.9	0.935673	32	34.2	17.6
peripheral nerve disease	0	0	57	121	2.31	66.3	23	1.10714	31	28	1.46333	43.9	30	5.6
numbness of limb	0	1	63	127	2.28	58.1	22	1.61985	8.65	5.34	1.6	44	27.5	2.5
albuminuria	0	1	24	110	2.26	86.6	10	1.90332	12.6	6.62	1.52613	43.8	28.7	1.5
Type 2 diabetes	0	0	81	81	2.32	220.1	11	0.923588	27.8	30.1	1.34812	39.5	29.3	2.3
chronic renal insufficiency	0	0	59	118	2.38	139.5	42	1.64918	11	6.67	1.29032	36	27.9	2.1
dropsical nephritis	0	0	48	134	1.92	46.5	12	0.843243	15.6	18.5	0.804781	20.2	25.1	1.9
arthralgia	0	0	67	123	21.8	44.9	36	0.967136	20.6	21.3	1.05292	37.8	35.9	1.4
Chronic kidney disease	0	0	37	126	2.33	61.4	16	1.71296	11.1	6.48	1.35241	44.9	33.2	1.9
sense of suppression in the chest	0	0	72	96	2.34	118.4	11	0.958333	23	24	1.1404	39.8	34.9	1.8
chronic cardiac insufficiency	0	1	87	101	2.22	179.3	15	1.36667	12.3	9	1.09365	32.7	29.9	1
hydroncus	0	0	51	138	2.23	49.4	10	1.99292	8.45	4.24	1.568	39.2	25	1.2
chronic renal failure	0	1	115	110	2.06	329.9	4	0.777778	3.5	4.5	1.35498	31.3	23.1	1
acute renal insufficiency	0	1	54	96	2.01	475.8	2	0.792453	4.2	5.3	2.06667	34.1	16.5	2.1
Type 2 diabetes	0	0	72	97	2.15	182.5	10	1.63946	9.64	5.88	1.34538	33.5	24.9	2
Choledochoria crystallization	0	0	62	84	2.01	66	9	1.6	12	7.5	0.696629	24.8	35.6	2.3
peripheral nerve disease	0	0	40	123	2.3	78	12	1.2	5.4	4.5	1.48014	41	27.7	2.2
albuminuria	0	1	23	142	2.26	52	10	1.01515	6.7	6.6	1.43064	49.5	34.6	2.1
nephroma	0	1	71	141	2	67.8	12	1.50162	4.64	3.09	1.11163	23.9	21.5	2.3
peripheral nerve disease	0	1	61	120	2.45	89	21	1.40625	13.5	9.6	2	34	17	2.3
Chronic kidney disease at stage 4	0	0	59	114	2.48	263.2	19	1.92308	12.5	6.5	1.41197	40.1	28.4	2.2
kidney stone	0	1	80	70	2.09	709	18	1.76923	11.5	6.5	1.36719	35	25.6	1.9
arthrolithiasis	0	1	73	114	2.1	97.3	15	1.56642	6.25	3.99	1.85561	34.7	18.7	2.3
AD	0	1	41	88	2.18	109.3	84	1.60839	23	14.3	0.641469	29.7	46.3	2.1
fever caused by infection	0	1	67	77	2.18	284.5	12	1.42222	12.8	9	1.15636	31.8	27.5	2.3
cardiac insufficiency	0	0	76	108	2.25	60.8	91	2.91139	230	79	0.927027	34.3	37	2.1
Renal malignancy	0	0	66	110	2.29	343.3	63	1.57042	15.5	9.87	1.11919	38.5	34.4	2.1
Rectal malignancy	0	1	20	159	2.42	89.9	15	1.4383	33.8	23.5	1.13235	43.1	34	1.9
Liver occupying lesions	0	1	58	86	1.92	139.6	12	1.07339	23.4	21.8	0.425287	18.5	43.5	2.2
primary hypertension	0	1	68	147	2.1	90.5	20	1.53747	5.95	3.87	1.68182	37	22	2.1
And IGG 4-associated disease	0	1	60	137	2.22	119	2	1.17593	12.7	10.8	0.989189	36.6	37	2.3
arthralgia	0	0	51	51	2.24	54.6	16	1.77966	10.5	5.9	1.63877	37.2	22.7	2.1
nodular vasculitis	0	1	60	112	2.32	273.7	120	1.59843	20.3	12.7	0.813953	38.5	47.3	1.9
diabetic nephropathy	0	0	78	89	2.27	204.7	12	1.68337	7.39	4.39	1.32308	34.4	26	2
hydroncus	0	0	88	106	2.24	108.2	21	1.46296	7.9	5.4	1.33808	37.6	28.1	5.4
hydroncus	0	1	89	111	2.05	79.8	19	1.93846	12.6	6.5	2.31034	33.5	14.5	1.3
hypertension	0	0	53	112	2.23	201.6	15	1.79688	11.5	6.4	1.47547	39.1	26.5	1.2
Chronic kidney disease	0	0	60	77	2.16	465.1	23	1.87888	12.1	6.44	1.12975	35.7	31.6	46.64
albuminuria	0	1	55	143	2.47	69.2	25	3.22857	22.6	7	1.52941	41.6	27.2	10.5
hematuresis	0	0	26	115	2.15	57.5	10	1.70526	8.1	4.75	1.52823	37.9	24.8	2.4
hemodialysis	0	1	51	87	2.07	699.2	15	1.76871	13	7.35	1.05788	32.9	31.1	39.9
Body fatigue	0	1	71	136	2.37	76.9	9	1.40373	11.3	8.05	1.38267	38.3	27.7	2.4
hydroncus	0	1	40	195	2.36	86.9	34	1.08571	11.4	10.5	1.57197	41.5	26.4	45.7
nephritis	0	0	29	141	2.19	54.4	20	1.89286	10.6	5.6	1.26354	35	27.7	35.6
albuminuria	0	0	48	140	2.38	71.5	30	1.90698	8.2	4.3	1.30793	42.9	32.8	23.6
myocardiosis	0	1	49	153	2.25	90.7	15	0.709302	12.2	17.2	1.85	40.7	22	1.9
Chronic kidney disease	0	0	71	62	2.31	676.3	30	1.875	10.5	5.6	1.01497	33.9	33.4	43.8
hematuresis	0	1	28	122	2.45	122.2		1.29213	11.5	8.9	1.2454	40.6	32.6	56.7
chronic nephritis	0	1	42	153	2.21	99.1	32	2.27049	55.4	24.4	1.35401	37.1	27.4	23.4
benign tumor of stomach	0	1	78	112	2.02	49.2	23	4.48387	97.3	21.7	1.55376	28.9	18.6	21.4
Chronic kidney disease stage 5	0	1	60	147	2.23	73.6	12	1.96591	8.65	4.4	1.72609	39.7	23	34.5
renal inadequacy	0	1	68	85	1.85	511.5	2	1.81081	13.4	7.4	1.2	35.4	29.5	23.5
hydroncus	0	1	23	165	1.84	77.2	4	1.17895	11.2	9.5	1.07263	19.2	17.9	23.5
Dry syndrome	0	0	70	110	2.1	59.6	51	3.35789	31.9	9.5	0.662675	33.2	50.1	2.1
pyoperitoneum	0	1	58	120	1.98	45.5		1.53409	13.5	8.8	0.830882	22.6	27.2	2.3
renal inadequacy	0	1	41	117	2.23	912.4	44	1.28926	15.6	12.1	1.5259	38.3	25.1	17.9
acute renal insufficiency	0	1	79	125	2.14	118.2	91	1.17544	13.4	11.4	1.29333	38.8	30	15.6
Chronic kidney disease at stage 4	0	1	65	118	2.19	366.6	45	1.18584	13.4	11.3	1.46122	35.8	24.5	23.5
Acute kidney damage	0	0	51	127	2.42	85.9	24	1.08654	11.3	10.4	1.63396	43.3	26.5	2.1
Benign pituitary tumor	0	0	77	105	2.02	106.3	23	1.68605	14.5	8.6	1.60251	38.3	23.9	1.6
renal inadequacy	0	0	63	95	2.34	130.5	65	1.79407	11.5	6.41	1.20118	40.6	33.8	14.5
Type 2 diabetes	0	1	66	142	2.51	148.5	21	2.71403	14.9	5.49	1.24752	37.8	30.3	45.4
acute renal insufficiency	0	1	61	117	2.22	150	45	1.39583	13.4	9.6	1.32727	36.5	27.5	34.6
diabetes mellitus	0	1	58	102	2.33	146.7	23	1.63158	15.5	9.5	1.25338	37.1	29.6	45.6
hypertension	0	1	男	58	2.26	90.9	20	1.97133	11	5.58	1.44863	42.3	29.2	12.3
Urinary infection	0	0	66	179	1.98	90.4	23	1.19048	12.5	10.5	1.7378	28.5	16.4	25.6
Chronic kidney disease stage 5	0	1	30	151	2.64	99.8	45	1.336	16.7	12.5	2.33182	51.3	22	1.3
arthritis deformans	0	0	84	107	2.06	168.6	30	1.1087	20.4	18.4	1.132	28.3	25	1.2
lumbago	0	0	66	133	2.17	51.5	6	1.92568	11.4	5.92	1.35	43.2	32	1.3
albuminuria	0	1	54	162	2.19	88	8	1.04348	12	11.5	1.34021	39	29.1	65.5
hydroncus	0	1	57	151	2.3	66.1	14	1.82796	11.9	6.51	1.40268	41.8	29.8	1.4
hydroncus	0	0	68	127	1.98	50	23	1.45882	37.2	25.5	0.548961	18.5	33.7	1.2
hydroncus	0	0	67	166	2.11	78.6	3	1.45882	12.4	8.5	1.2724	35.5	27.9	1.1
arthrolithiasis	0	1	53	128	2.47	145.9	4	1.86517	16.6	8.9	1.34106	40.5	30.2	0.9
IGA nephroma	0	0	33	128	2.34	211.4	12	0.874251	14.6	16.7	1.45183	43.7	30.1	2.45
Chronic kidney disease	0	1	35	155	2.32	130.4	14	1.22963	16.6	13.5	1.80843	47.2	26.1	3.55
hydroncus	0	0	81	103	1.98	461.6	21	21.8605	188	8.6	0.947581	23.5	24.8	56.7
The heart trembling	0	1	71	104	2.04	119.6	25	1.77143	12.4	7	1.85294	31.5	17	45.6
fever caused by infection	0	0	64	76	1.98	583.8	78	1.11429	15.6	14	1.56034	36.2	23.2	34.5
give out heat	0	1	74	138	1.91	91.4	45	0.779434	52.3	67.1	0.909953	19.2	21.1	23.5
Type 2 diabetes	0	1	68	125	2.27	121.5	34	1.25	23	18.4	1.60251	38.3	23.9	34.5
acute heart failure	0	1	44	156	2.01	145.8	11	1.60305	210	131	1.53881	33.7	21.9	1.4
dropsical nephritis	0	0	50	120	1.93	52.5	9	0.876404	15.6	17.8	1.14379	17.5	15.3	2.3
Optic nerve yan	0	0	65	110	2.35	58.1	17	0.924528	24.5	26.5	1.52917	36.7	24	2.4
pulmonary infection	0	1	33	111	2.2	65.3	24	0.92069	26.7	29	1.4625	35.1	29.9	67.8
Type 2 diabetes	0	1	45	89	2.39	106.4	3	1.40816	34.5	24.5	1.34505	42.1	31.3	78.8
renal inadequacy	0	1	78	68	2.16	626	2	1.06667	25.6	24	1.26908	31.6	24.9	23.1
acute hepatic failure	0	1	48	67	2.56	212.5	20	1.21538	7.9	6.5	0.727019	26.1	35.9	23.5
metastasizing septicemia	0	0	68	92	2.08	384.5	12	1.16935	14.5	12.4	1.53061	30	19.6	32
Type 2 diabetes	0	0	67	110	2.35	134.5	56	1.60847	30.4	18.9	1.53125	44.1	28.8	24
Chronic kidney disease stage 5	0	1	72	119	2.28	611.1	104	1.07879	17.8	16.5	0.718623	35.5	49.4	24.5
chronic renal failure	0	1	67	62	1.66	158.6	28	0.904762	19	21	1.3375	32.1	24	35.4
albuminuria	0	1	36	131	2.49	120.4	45	2.48639	13.7	5.51	1.47335	47	31.9	35.7
Urinary infection	0	1	51	144	2.23	66	21	0.868263	14.5	16.7	1.74146	35.7	20.5	2.1
pancytopenia	0	0	54	106	2.36	61.7	2	2.26545	9.9	4.37	1.66538	43.3	26	2.3
albuminuria	0	1	29	143	2.46	101.8	13	2.3986	34.3	14.3	1.70103	49.5	29.1	23.1
dropsical nephritis	0	1	55	135	2.23	130.7	5	1.40138	4.05	2.89	1.33735	33.3	24.9	78.9
And ANCA-associated nephritis	0	0	69	111	2.23	121.1	44	0.770732	15.8	20.5	1.26	375	29.8	10.28
Chronic nephritis syndrome; chronic kidney disease stage 3	0	1	22	113	2.12	240.7	2	1.93434	38.3	19.8	1.79	36.2	20.2	0.55
hyperlipemia	0	0	54	133	2.34	56.9	30	3.25	14.3	4.4	1.16	39.4	34.1	0.2
IgA nephroma	0	0	54	113	2.43	118.9	27	4.44595	98.7	22.2	0.97	41.4	42.7	1.33
albuminuria	0	1	55	176	2.39	95.4		#DIV/0!			1.84	43.9	23.9	0.52
systemic lupus erythematosus	0	0	50	134	2.26	177.3	25	1.29457	16.7	12.9	1.51	30.1	19.9	0.54
Chronic kidney disease stage 5	0	1	46	108	2.12	271.9	35	2.23938	11.6	5.18	0.93	29	31.1	22.7
Chronic kidney disease, stage 3	0	0	89	152	2.16	83.9	21	1.84543	5.85	3.17	1.51	29.2	19.3	4.13
IgA nephroma	0	1	35	147	2.53	234.5	25	0.395556	3.56	9	1.6	41.1	25.7	9.68
Chronic kidney disease stage 5	0	1	22	92	1.98	575.3	30	1.97566	8.93	4.52	1.11	35.7	32.1	21.45
IgA nephroma	0	1	28	134	2.33	110.6	4	2.7	27.0	10	1.28	34.3	26.7	0.2
Diabetic nephropathy	0	1	65	159	2.51	93.6	16	2.39048	25.1	10.5	1.76	48.5	275	0.64
IgA nephroma	0	1	28	161	2.45	70.3	2	2.14286	10.5	4.9	1.6	38.8	24.3	0.2
chronic nephritic syndrome	0	1	36	129	2.37	86.4	81	2.74359	10.7	3.9	1.15	37.8	33	0.2
chronic nephritic syndrome	0	1	35	151	2.39	66.2	3	2.39144	78.2	32.7	1.75	46.8	26.7	2.11
IgA nephroma	0	1	43	120	2.24	160.2	56	1.20408	4.13	3.43	1.59	36.3	22.8	5.76
albuminuria	0	0	65	99	2.22	78.3	11	1.79487	7.0	3.9	1.58	37.7	23.8	2.32
Systemic lupus erythematosus; chronic renal failure	0	0	46	110	1.69	295.1	30	0.589744	9.2	15.6	1.16	36	31	8.55
Chronic kidney disease, stage 3	0	1	72	115	2.19	205.5	40	0.395556	3.56	9	1.6	42.2	26.3	96.12
Chronic kidney disease, stage 3	0	1	70	124	2.13	190.3	19	1.61327	7.05	4.37	1.54	38.4	24.9	11.28
nephrotic syndrome	0	0	65	104	2.16	65.0	18	1.49171	108	72.4	1.83	40.2	22	0.2
IgA nephroma	0	1	66	118	1.98	140.3	5	2.26974	34.5	15.2	1.24	29.1	23.4	0.35
Chronic kidney disease stage 4; IgA nephropathy	0	0	46	115	2.44	229.1	21	2.25781	57.8	25.6	1.14	42.8	37.4	0.2
Membranous nephropathy; chronic kidney disease stage 2	0	0	48	135	2.10	72.4	18	0.683698	28.10	41.1	1.05	28.3	27	0.2
IgA nephroma	0	0	32	113	2.15	68.4	7	1.78571	12.5	7	1.18	31.9	27	0.2
albuminuria	0	0	86	141	2.06	71.8	25	0.842932	48.3	57.3	1.07	34.8	32.6	12.09
IgA nephroma	0	0	54	131	2.33	61.1	24	0.76204	26.9	35.3	1.08	35.8	33.1	0.2
IgA nephroma	0	0	54	134	2.33	82.1	24	0.76204	26.9	35.3	1.34	38.1	28.5	0.2
Chronic nephritis syndrome; chronic kidney disease stage 3	0	1	22	121	2.21	444.6	2	1.93434	38.3	19.8	1.69	38.8	23	0.55
IgA nephropathy; osteoporosis; renal bone disease	0	0	30	121	2.29	68.4	26	1.91606	10.5	5.48	1.25	39.2	31.4	0.2
IgA nephropathy; renal osteodystrophy; chronic kidney disease stage 3; chronic renal failure	0	1	32	142	2.21	81.6	21	1.87221	92.3	49.3	1.36	36.4	26.8	0.2
membranous nephropathy	0	0	33	117	2.26	62.1	39	1.36641	17.9	13.1	0.83	30.8	37.3	0.2
chronic nephritic syndrome	0	1	32	151	2.28	92.7	2	2.0044	9.12	4.55	1.68	46.8	27.9	0.2
chronic nephritic syndrome	0	0	73	126	2.31	96.6	16	2.12062	10.9	5.14	1.42	37.6	26.4	3.4
nephrotic syndrome	0	1	65	110	1.64	82.3	7	2.0101	1.99	0.99	1.07	15	14	0.91
Chronic nephritis syndrome; IgM nephropathy	0	1	23	145	1.70	95.7	120	1.5871	246	155	0.53	11.6	21.9	0.2
IgA nephropathy; hyperuricemia	0	1	30	121	2.19	81.7	110	1.7234	40.5	23.5	1.39	37.6	27.1	0.2
prostatitis	0	1	45	135	2.17	99.5	30	1.9837	36.5	18.4	1.39	29.8	21.4	0.2
Nephrotic syndrome; diabetes; osteoporosis; hypertension; glomerular micropathology	0	1	71	160	2.25	69.4	12	1.39444	25.1	18	1.62	41.7	25.8	1.3
Chronic kidney disease, stage 4	0	0	34	108	2.41	226.4	11	1.71778	7.73	4.5	1.65	45.4	27.5	0.61
Nephrotic syndrome; membranous nephropathy; renal osteodystrophy; renal anemia	0	1	54	90	1.85	62.9	57	1.81868	6.62	3.64	0.64	19.3	30.3	1.95
Membranous nephropathy; chronic kidney disease stage 3	0	0	71	110	1.99	78.8	46	1.29657	5.29	4.08	1.18	26	22.1	0.6
membranous nephropathy	0	1	31	146	2.19	102.2	45	1.79251	6.22	3.47	1.35	42.1	31.3	0.59
Chronic kidney disease stage 3; chronic renal failure; renal artery occlusion	0	1	83	138	2.22	122.2	14	3.51948	27.1	7.7	1.17	39.4	33.7	0.72
Chronic nephritis syndrome; type 2 diabetes mellitus	0	0	42	133	2.17	65.9	22	6.88003	88.89	12.92	1.2	35.1	29.2	0.31
Castleman Disease	0	0	50	81	2.13	57.8	89	0.62697	35.8	57.1	0.83	27.4	33.1	0.34
Kidney stones; prostate calcification; ejaculinal duct cyst; urinary tract infection; IgA nephropathy	0	1	36	140	2.38	89.6	6	2.03922	8.32	4.08	1.57	43.3	27.5	0.2
IgA nephropathy; chronic kidney disease stage 3	0	0	52	122	2.31	139.4	5	2.44248	138	56.5	1.16	33.9	29.3	2.46
Chronic kidney disease stage 4; hypertension; chronic nephritis syndrome	0	1	73	1110	2.25	316.4	94	2.90426	273	94	1.13	36.8	32.7	0.92
Renal anaemia; hyperlipidemia; hypertensive renal impairment	0	1	28		2.20	503.9	35	3.93701	350	88.9	1.06	30.8	29	3.46
IgA nephroma	0	1	23	158	2.42	74.2	2	3.55263	40.5	11.4	1.62	46.1	28.4	0.2
chronic renal failure	0	1	53	140	2.62	138.6	30	1.67591	9.67	5.77	1.15	39.8	34.6	0.39
membranous nephropathy	0	1	56	118	1.96	79.2	15	2.07614	4.09	1.97	1.10	20	18.2	0.52
Type 2 diabetes mellitus is associated with renal complications	0	1	61	125	1.94	654.7	39	1.61538	10.5	6.5	1.68	26.1	15.5	12.5
nephrotic syndrome	0	1	72	143	2.02	141.7	11	1.94667	5.84	3.0	0.99	22	22.3	0.37
Proteinuria; hematuria; chronic nephritis syndrome; renal hypertension; hyperlipidaemia	0	1	37	164	2.28	68.1	3	3.75	21.0	5.6	1.58	41.9	26.6	0.2
Type 2 diabetic nephropathy; hypertension	0	1	57	154	2.37	92.0	6	2.17931	31.6	14.5	1.35	35.5	26.2	1.11
gA nephroma	0	1	36	157	2.38	89.6	6	2.03922	8.32	4.08	1.57	43.3	27.5	0.52
membranous nephropathy	0	1	65	121	2.04	100.7		1.96875	25.2	12.8	1.99	41.5	20.9	6.97
renal inadequacy	0	0	57	130	2.43	97.2	27	2.25	10.8	4.8	1.45	43.7	30.2	0.57
IgA nephropathy; chronic kidney disease stage 1	0	1	54	132	2.30	82.3	35	2.016	25.2	12.5	1.51	40.7	27	0.24
Gout; chronic kidney disease, stage 2	0	1	47	152	2.22	149.2	16	1.79487	7	3.9	1.43	35.2	24.6	0.46
nephrotic syndrome	0	1	57	130	2.11	111.4		1.12763	85.7	76.0	0.96	29.2	30.3	0.2
Renal allergic purpura; acute glomerulonephritis	0	1	25	120	2.24	206.2	37	1.8319	85	46.4	1.27	36.7	28.8	3.12
IgA nephropathy; fatty liver; hepatic insufficiency; chronic kidney disease stage 3	0	1	44	142	2.27	105.9	14	2.73134	18.3	6.7	1.48	41.7	28.1	0.2
Chronic nephritis syndrome; chronic kidney disease stage 3	0	1	22	133	2.12	261.8	2	1.93434	38.3	19.8	1.79	36.2	20.2	0.55
Proteinuria; IgA nephropathy	0	1	29	160		83.4	14	1.89231	36.9	19.5	1.57	47	30	0.28
IgA nephropathy; chronic renal failure; chronic kidney disease stage 3	0	0	75	96	2.52	150.5	62	1.72611	12.1	7.01	1.09	37.6	34.6	0.6
amyloidosis	0	0	60		2.21	46	25	0.18932	3.9	20.6	2.05	35.2	17.2	0.2
Diabetic nephropathy stage IV; chronic kidney disease stage 3; IgA nephropathy	0	1	42	114	2.05	165.3	36	1.82051	7.1	3.9	1.15	26.9	23.3	14.51
IgA nephroma	0	1	24	146	2.31	82.8	4	2.7383	15.8	5.77	1.43	43.3	30.2	0.2
IgA nephropathy; gout; chronic kidney disease stage 3	0	1	51	119	2.24	219.3	15	1.59626	8.54	5.35	1.58	40.1	25.3	1.25
albuminuria	0	1	52	162	2.24	76.4	5	1.36048	90.2	66.3	0.98	24.5	24.9	0.35
Allenic purpura; renal allergenic purpura; chronic renal failure; chronic kidney disease stage 2	0	1	34	145	2.30	96.0	8	0.670782	16.30	24.30	1.30	37.2	28.6	0.2
IgA nephropathy; chronic kidney disease stage 2; chronic renal failure	0	1	28	134	2.31	142.3	4	2.7	27	10	1.24	37.7	30.3	0.2
Nephrotic syndrome; membranous nephropathy; renal osteodystrophy; renal anemia	0	1	54	118	1.92	91.9	57	2.1016	39.3	18.7	1.10	21.4	19.4	1.95
CG	0	0	28	115	2.29	71.4	16	1.82927	12.0	6.56	1.34	25.6	19	0.2
Type 2 diabetes mellitus with multiple complications	0	1	59	77	2.00	496.8	12	1.32184	11.5	8.70	0.76	27.3	36.1	11.8
Chronic nephritis syndrome; type 2 diabetes mellitus	0	0	42	133	2.17	65.9	22	0.703297	12.8	18.20	1.20	35.1	29.2	0.31
albuminuria	0	0	40	132	2.28	52.9	12	2.18444	7.58	3.47	1.67	36.2	21.7	0.33
Chronic nephritis syndrome; chronic kidney disease stage 1	0	1	36	129	2.27	75	26	2.74359	10.7	3.9	1.12	37.7	33.6	0.2
IgA nephroma	0	1	23	158	2.42	74.2	2	3.55263	40.5	11.4	1.62	46.1	28.4	0.2
Immunotherapy for chronic kidney disease	0	1	60		1.83'	83	75	1.41224	346	245	0.70	16.1	22.9	0.2
Type 2 diabetes mellitus; diabetic nephropathy	0	1	49	108	2.21	237.2	10	1.39341	7.19	5.16	0.99	26.5	26.8	11.9
albuminuria	0	0	38	147	2.32	63.7	17	1.33878	9.01	6.73	1.47	42	28.6	0.27
hematuresis	0	0	52	122	2.34	75.3	21	1.77524	10.9	6.14	1.36	39.3	28.9	0.2
Chronic kidney disease, stage 4	0	1	67	127	2.10	257.8	7	0.574597	62.7	109.12	1.35	36.8	27.3	0.99
nephrotic syndrome	0	0	62	133	2.18	73.6	15	1.54487	24.1	15.6	1.43	32.3	22.6	0.2
chronic nephritis	0	0	76	75	2.06	266.6	14	1.46272	6.67	4.56	1.26	30.3	24	42.16
IgA nephropathy; thin basement membrane nephropathy; renal cyst	0	0	68	99	2.14	87.1	24	1.79487	7.0	3.9	1.45	35.2	24.3	1.01
IgA nephropathy; chronic kidney disease stage 1	0	1	54	140	2.30	82.3	35	#DIV/0!			1.25	32.4	26	0.24
Prostate malignancy	0	1	64	113	2.11	75.7	12	1.92248	4.96	2.58	0.74	21.9	29.4	0.2
kidney stone	0	0	27	120	2.44	60.3	10	2.12551	10.5	4.94	1.59	46.5	29.3	0.2
chronic nephritic syndrome	0	0	64	116	2.0	83.1	43	2.01911	6.34	3.14	1.11	26	23.5	0.29
systemic lupus erythematosus	0	0	73	141	1.90	84.8	57	1.15341	8.12	7.04	0.51	16.6	32.3	21.23
IgA nephroma	0	0	22	116	2.42	58.6	30	1.76056	25.0	14.2	1.53	45.3	29.7	0.28
chronic nephritic syndrome	0	0	33	106	2.10	49.9	17	2.75115	5.97	2.17	1.17	26.9	22.9	0.2
albuminuria	0	0	24	112	2.31	57.0	2	1.82051	7.1	3.9	1.67	42.8	25.6	0.29
Chronic kidney disease stage 3; hypertension; gout; proteinuria	0	1	53	171	2.19	114.1	7	2.41045	64.6	26.8	1.47	37.9	25.7	5.3
membranous nephropathy	0	1	54	141	1.93	73.3	2	1.5098	23.1	15.3	0.97	21.7	22.3	0.5
IgA nephropathy; renal osteodystrophy; chronic kidney disease stage 3; chronic renal failure	0	1	32	150	2.39	88.5	21	1.87221	92.3	49.3	1.73	41.1	23.8	0.2
membranous nephropathy	0	1	56	118	1.96	79.2	15	1.92399	162	84.2	1.10	20	18.2	0.52
chronic nephritic syndrome	0	1	52	110	2.16	100.5	10	4.53191	21.3	4.7	1.16	34.3	29.5	1.23
IgA nephroma	0	0	34	112	2.26	59.6	17	2.07317	13.6	6.56	1.30	40.2	30.9	0.2
Hepatitis B and liver cirrhosis; chronic kidney failure; chronic kidney disease stage 3	0	1	42	130	2.17	97.1	15	1.79167	6.02	3.36	1.28	30.3	23.7	0.46
IgA nephropathy; hypercholesterolemia with endogenous hyperglyceridolemia; hyperhomocysteinemia	0	1	34	157	2.27	120.1	6	1.93798	25.0	12.9	1.27	36.8	28.9	0.2
IgA nephroma	0	0	62		2.35	165.4	24	2.35366	96.5	41.0	1.27	35.3	27.7	1.95
Chronic kidney disease stage 4; renal anemia	0	1	73	95	2.17	152.6		1.26027	18.4	14.6	1.43	40.5	28.3	24.87
renal inadequacy	0	1	74		2.43	158.4	20	2.03922	10.4	5.10	1.45	45.4	31.4	0.2
lumbago	0	0	58	132	2.38	62.8	19	2.07516	12.70	6.12	1.49	44.2	29.6	0.2
Colonic polyps; diabetic kidney disease; chronic renal failure; chronic kidney disease stage 2	0	1	55	155	2.38	94.4	2	2.09434	11.1	5.3	1.76	45.2	25.7	0.3
Type 2 diabetes mellitus with multiple complications; cerebral artery stenosis; diabetic nephropathy; chronic kidney disease stage 4	0	1	90	80	1.97	400	22	2.03327	11.0	5.41	1.19	34.9	29.4	39.66
Proteinuria; hyperlipidemia; essential hypertension	0	1	76		2.30	74.3	12	1.65313	9.77	5.91	1.38	40.1	29	0.2
IgA nephropathy; hyperuricemia	0	1	30	130	2.19	81.7	8	1.7234	40.5	23.5	1.39	37.6	27.1	0.2
renal inadequacy	0	0	62	115	2.24	145.4	10	1.58581	9.61	6.06	1.52	38.8	25.5	2.49
Type 2 diabetes mellitus with multiple complications; type 2 diabetic nephropathy stage V; IgA nephropathy; renal anemia	0	1	44	69	2.19	124.7		1.20408	4.13	3.43	1.48	35.5	24	5.76
Low back pain; high blood pressure	0	1	50	136	2.21	93.5	3	3.36232	23.2	6.9	1.55	38.8	25.1	0.21
The pathogenic carrier of viral hepatitis	0	1	41	159	2.33	97.5		6.78667	50.9	7.5	1.99	49.6	24.9	0.42
Glomerulonephritis; purpura	0	1	23		2.36	88.3	2	1.6	6.32	3.95	1.60	37.9	23.7	0.2
Chronic kidney disease, stage 2	0	1	40	153	2.33	112.7	6	2.26	11.30	5.00	1.64	41.8	25.5	0.2
IgA nephropathy; chronic kidney disease stage 3	0	0	52	95	2.32	139.4	9	2.44248	138	56.5	1.16	33.9	29.3	2.46
Post-coronary stent implantation status; ischaemic cardiomyopathy	0	1	67		2.13	67.8	4	1.74747	17.3	9.9	1.42	34.9	24.6	0.2
chronic nephritic syndrome	0	1	51	158		78.7	3	1.78295	9.20	5.16	1.30	38.6	29.6	0.2
nephrotic syndrome	0	1	20	145	1.83	124.3	25	1.78295	9.20	5.16	0.67	14	20.9	0.43
IgA nephroma	0	0	53	126	2.08	77.6		1.86121	5.23	2.81	1.31	28.1	21.4	0.53
Hypertension, grade 2; prostatic hyperplasia	0	1	73	144	2.32	91.3	2	2.31629	14.5	6.26	1.30	43.3	33.4	0.2
Chronic renal failure; IgA nephropathy	0	1	51	139	2.32	260.7	34	2.21767	70.3	31.7	1.24	39.3	31.8	0.83
Chronic nephritis syndrome; chronic kidney disease stage 3; chronic renal failure	0	0	79	121	2.31	100.4	10	2.13793	12.4	5.8	1.10	39	35.3	0.2
membranous nephropathy	0	0	53	128	1.98	51.9	30	1.9186	16.5	8.6	0.85	24.6	29	0.2
chronic renal failure	0	1	62	95	2.20	258.3	5	1.52055	11.1	7.3	0.94	30.3	32.1	3
nephrotic syndrome	0	1	64	106	2.23	78	12	1.92248	4.96	2.58	0.65	20	31	0.23
Chronic kidney disease stage 5	0	0	80	72	1.88	493.3	10	2.48357	189	76.1	0.63	21.8	34.5	20
Chronic nephritis syndrome; hypertension; essential hypertension	0	1	32	157	2.28	89.9	2	2	7.8	3.9	1.54	44.4	28.9	0.2
Diabetic nephropathy; chronic kidney disease stage 3; hypertension	0	0	49	101	2.26	147.0	14	1.81579	34.5	19.0	1.38	41.4	30	19.83
Renal insufficiency; hypertension grade 3	0	0	81	123	2.56	148.8	49	1.78306	12.0	6.73	1.33	45.7	34.4	0.18
renal inadequacy	0	1	52	150	2.34	107.5	14	2.44737	9.3	3.8	1.59	72	27.8	0.2
Type 2 diabetic nephropathy	0	1	84	135	2.01	151.0	9	1.94947	7.33	3.76	0.86	22.6	26.4	8.4
IgA nephropathy; type 2 diabetic nephropathy stage III; essential hypertension	0	1	68	138	1.80	196.4	15	2.53247	19.5	7.7	1.80	36.3	20.2	1.43
Systemic lupus erythematosus, involving organs or systems; acute renal damage	0	0	29	109	2.00	84.1	17	1.24242	20.5	16.5	0.94	19.6	20.9	0.2
chronic renal failure	0	1	70	127	2.53	167.4	5	1.93878	11.40	5.88	1.34	43.7	32.6	0.2
IgA nephropathy; fatty liver; hepatic insufficiency; chronic kidney disease stage 3	0	1	44	143	2.21	104.3	10	2.73134	18.3	6.7	1.45	39.1	27	0.2
Chronic kidney disease stage 5	0	1	47	76	1.74	663.4	12	1.61233	8.11	5.03	0.73	19.7	26.9	12.2
Chronic nephritis syndrome; IgA nephropathy; renal bone disease; chronic active viral hepatitis B; osteoporosis; gastritis; cystitis	0	0	40	107	2.13	103.5	8	2.24088	61.4	27.4	1.18	34	28.9	0.9
Kidney stones; prostate calcification; ejaculinal duct cyst; urinary tract infection; IgA nephropathy	0	1	36	144	2.38	89.6	12	2.76596	52.0	18.8	1.57	43.3	27.5	0.2
Hereditary nephritis; hyperlipidemia	0	0	17	119	2.03	54.2	20	1.39899	27.7	19.8	1.43	30.9	21.6	0.2
cerebral infarction	0	1	59	90	1.90	363.6	120	1.83234	6.12	3.34	0.83	19.8	23.9	49.73
Renal insufficiency; chronic kidney disease, stage 3	0	1	56	148	2.29	139.1	2	#DIV/0!			1.26	39.7	31.4	4.93
Renal malignancy; chronic renal failure; renal anemia; renal bone disease; hypercalcemia; stage 4 associated anemia of chronic renal disease	0	0	91	113	3.27	224.2	9	5.06077	91.6	18.10	1.24	33.6	27.2	2.9
Nephrotic syndrome; membranous nephropathy; renal osteodystrophy; renal anemia	0	1	54	95	1.85	62.9	57	1.81868	6.62	3.64	0.89	20.2	22.8	0.39
Type 2 diabetes mellitus with multiple complications	0	1	46	129	2.33	100.5	10	2.42133	9.08	3.75	1.35	38.4	28.4	2.02
Glomerulonephritis; purpura	0	1	23	148	2.36	88.3	2	1.6	6.32	3.95	1.60	37.9	23.7	0.2
Type 2 diabetes mellitus; diabetic nephropathy; hypertension	0	0	83	123	2.23	98.3	31	2.48756	10.0	4.02	1.19	33.9	28.5	1.63
nephrotic syndrome	0	0	19	131	2.18	45.6	22	2.36979	45.5	19.2	0.98	31.4	32.1	0.23
Chronic nephritis syndrome; diabetes mellitus; dyslipidemia; sleep disorders; osteoporosis; renal hypertension	0	0	61	150	2.07	86.1	10	1.49227	67.6	45.3	1.28	28.9	22.5	0.2
renal inadequacy	0	1	58	149		119.2	9	1.69284	7.33	4.33	1.61	44	27.3	0.11
albuminuria	0	0	38	143	2.38	74.6	5	1.71535	6.93	4.04	1.60	40.1	25.1	0.6
Membranous nephropathy; renal bone disease	0	1	56	130	2.19	88.7		0.850202	21	24.7	1.31	31.1	23.7	0.53
Renenic purpura; renal bone disease; chronic kidney disease stage 1	0	0	18	127	2.36	75.6		1.46429	16.4	11.2	1.16	36.5	31.5	0.2
Type 2 diabetic nephropathy with hyperuricemia; chronic kidney disease stage 4	0	1	43	145	2.22	221.2	21	1.92936	87.4	45.3	0.95	31.3	32.8	0.2
Membranous nephropathy; chronic kidney disease stage 2; chronic renal failure	0	0	48	126	2.10	72.4	18	0.683698	28.1	41.10	1.05	28.3	27	0.2
Hepatitis B and liver cirrhosis	0	1	42	145	2.17	97.1	10	1.79167	6.02	3.36	1.28	30.3	23.7	0.46
IgA nephropathy; chronic kidney disease stage 2; chronic renal failure	0	1	28	139	2.31	142.3	4	2.15686	11.0	5.10	1.24	37.7	30.3	0.2
IgA nephropathy; bronchial asthma; reflux esophagitis; idiopathic osteoporosis; chronic kidney disease stage 3; steroid diabetes mellitus	0	1	32		2.24	94.5	18	1.91111	8.6	4.5	1.74	37.9	21.8	0.2
Chronic kidney disease stage 2; obesity; hyperuricemia	0	1	38	152	2.25	87.5	22	2.01299	9.3	4.62	1.23	37.7	30.7	0.47
Microscopic lesion of the glomeruli	0	0	44	129	1.84	51.2	49	1.85978	50.4	27.1	0.93	16.7	18	0.2
Abnormal results of the liver function tests	0	1	65	165	2.06	181.1	12	1.79868	10.9	6.06	1.31	35.2	26.8	8.19
Chronic renal failure; renal anemia	0	0	92	108	2.16	275.2	2	2.07167	185	89.3	1.01	31.2	31	11.8
renal inadequacy	0	0	61	93	2.17	145.1	6	1.45471	8.19	5.63	1.19	31.5	26.5	0.32
nephrotic syndrome	0	0	30	131	1.74	47.2	46	17.1429	12	0.7	0.80	17.6	22	0.51
Type 2 diabetes mellitus with renal complications; chronic kidney disease stage 3; chronic renal failure; type 2 diabetic peripheral neuropathy	0	1	85	110	2.30	165.4	59	2.40612	17.3	7.19	1.00	38.2	38.1	5.09
albuminuria	0	0	50	110	2.15	62.9	19	1.38855	4.61	3.32	1.28	30.3	23.7	0.4
Diabetic nephropathy; diabetes with complications; hypertension; chronic kidney disease stage 2; lower limb artery occlusion; renal artery occlusion	0	1	65	145	2.51	93.6	12	1.86261	8.27	4.44	1.76	48.5	27.5	1.64
Hypertension; proteinuria	0	1	41	161	2.33	83.8	23	2.50883	14.20	5.66	1.15	42.6	36.9	0.2
IgA nephropathy; renal osteodystrophy; chronic kidney disease stage 3; chronic renal failure	0	1	32	142	2.21	81.6	21	1.87221	92.3	49.3	1.36	36.4	26.8	0.2
chronic nephritic syndrome	0	0	45	113	2.37	118.8	40	2.21649	12.90	5.82	1.33	39.2	29.5	16.52
acute renal insufficiency	0	0	59	114	2.31	76.8	10	2.00669	12.00	5.98	1.22	37.7	31	0.3
membranous nephropathy	0	1	60	108	2.06	96.1	75	1.41224	346	245	0.87	21.3	24.4	12.87
renal inadequacy	0	1	62	128	2.37	182.7	12	1.90423	8.55	4.49	1.50	38.4	25.6	11
IgA nephroma	0	1	46	160	2.19	71.8	2	1.5902	7.14	4.49	1.46	38.3	26.2	0.32
IgA nephropathy; nephrotic syndrome; chronic kidney disease stage 3	0	1	50	119	1.81	129.7	13	#DIV/0!	12.9		0.66	15.2	23	1.91
Diabetic nephropathy at stage III	0	0	62	109	1.87	93.1	10	2.38028	3.38	1.42	1.07	20.4	19	0.7
hypertension	0	0	66	148	2.31	67.3		1.75676	5.20	2.96	1.58	34.6	21.9	1.83
IgA nephroma	0	0	40	124	2.38	68.1	16	2.52083	24.2	9.6	1.75	41.9	23.9	0.2
Membranous nephropathy; hypertension; connective tissue disease; anaemia; hypoproteinemia; osteoporosis; chronic gastritis; hypokalemia	0	0	33	109	2.26	62.1	38	1.36641	17.9	13.1		31.9	32.4	0.2
IgA nephropathy; hyperuricemia	0	1	30	121	2.19	81.7	12	1.7234	40.5	23.5	1.39	37.6	27.1	0.21
IgA nephroma	0	0	62	117	2.35	165.4	24	2.35366	96.5	41.0	1.27	35.3	27.7	1.95
Chronic nephritis syndrome; IgM nephropathy; hyperuricemia; reflux esophagitis; hyperlipidemia; lower urinary tract calculi; gout; autoimmune disease; acute upper respiratory sensation	0	1	23	146	1.70	95.7	120	1.5871	246	155	1.96	49	25	0.2
Chronic renal failure; hypertension; diabetes; diabetic nephropathy; gout; carotid plaque; hyperlipidemia; renal anemia; renal artery occlusion	0	1	61	128	2.40	214.5	10	1.93916	10.2	5.26	1.43	44	30.7	12.15
chronic nephritic syndrome	0	1	20	187	1.86	87.5	74	1.72897	3.70	2.14	0.60	15.9	26.3	0.27
nephritis	0	1	31	164	2.39	68.4	3	1.52209	9.3	6.11	1.53	41.1	26.8	0.2
albuminuria	0	0	50	121	2.15	62.9	19	1.38855	4.61	3.32	1.28	30.3	23.7	0.4
Chronic nephritis syndrome; chronic renal failure; hyperuricemia	0	1	36	156	2.32	111	4	2.77273	36.6	13.2	1.47	44.8	30.5	0.6
renal inadequacy	0	1	54	176	2.14	142.6	16	1.88518	9.03	4.79	1.21	32.8	27.2	13.41
hydroncus	0	0	67	肾脏病科	2.49	70.4	45	1.2	2.4	2	1.60	40.6	25.3	1.1
nephroma	0	1	56	133	40	75.9		#DIV/0!			0.9	34.9	38.9	0.44
Kidney disease, and also in the sigmoid colon goitre	0	1	73	64	2.23	560		1.79512	368	205	1.15	31.3	27.3	0.2
Kidney disease stage 5	0	1	73	83	1.99	878.3		#DIV/0!			1.49	35.4	23.7	0.12
Kidney disease stage 5	0	0	74	81	2.23	318.4	53	0.984375	126	128	1.27	35.7	28.1	17.6
Kidney disease stage 5?	0	1	56	79	2.14	411.9	9	0.741935	115	155	1.06	30.9	29.2	0.57
renal inadequacy	0	1	70	135	2.23	137.4		0.492877	17.3	35.1	1.36	39.5	29.1	0.2
renal failure	0	0	68	81	2.78	384.7	14	#VALUE!	-		1.53	30	19.6	32
Renal synthesis?	0	1	64	158	2.23	96.2		0.491525	11.6	23.6	2.5	38.8	15.5	0.23
arthrolithiasis	0	1	54	151	2.45	104.5	37	1.82051	7.1	3.9	0.89	37	41.6	0.2
connective tissue disease	0	0	68	108		68	60	1.25304	5.15	4.11	0.92	31.7	34.3	0.5
arthritis deformans	0	0	71	117	2.26	56.6	120	1.90299	25.5	13.4	0.59	32.9	56.2	2
arthritis deformans	0	1	83	90	2.1	106.8	10	7.10744	17.2	2.42	1.04	32.1	31	5.6
renal inadequacy	0	0	80	91	1.97	191.4	23	1.58974	12.4	7.8	0.74	22.9	31.1	101.96
renal inadequacy	0	1	56	118	2.07	52.1	23	0.320652	59	184	1.5819	36.7	23.2	7.66
Chronic kidney disease stage 5	0	1	51	59	2.34	831.3	20	1.35897	159	117	1.55	33.2	21.4	5.45
nephrotic syndrome	0	0	72	70	2.9	236.9	14	2.07563	247	119	0.945946	21	22.2	3.5
renal inadequacy	0	0	76	119	2.17	50.5	20	0.759657	53.1	69.9	1.5819	36.7	23.2	9.21
cataract	0	0	59	126	2.48	75.6	21	1.17956	42.7	36.2	1.44554	43.8	30.3	1.28
Type 2 diabetic nephropathy stage III	0	0	60	130	2.56	81.3	20	3.79111	85.3	22.5	1.34395	42.2	31.4	0.2
Chronic kidney disease stage 5	0	0	83	70	2	507.9	19	1.16216	129	111	1.27556	28.7	22.5	23.78
Chronic kidney disease, stage 4	0	1	63	120	2.4	223.4	12	1.02838	94.2	91.6	1.23952	41.4	33.4	1.65
hemacelinosis	0	1	86	92	2.1	110.1	10	0.566949	66.9	118	0.706989	26.3	37.2	8
chronic renal insufficiency	0	1	64	120	2.26	114	8	1.01129	62.7	62	0.966851	35	36.2	0.63
hemodialysis	0	0	51	92	2.17	695.6	62	0.648649	360	555	0.906344	30	33.1	39.9
toxuria	0	0	87	118	2.36	154.8	58	1.31068	27	20.6	1.08333	36.4	33.6	2.58
acute renal failure	0	住院	87					26.4766	1300	49.1	#DIV/0!
urinary tract infection	0	1	63	125	2.4	81.7	20	0.546875	31.5	57.6	1.15341	40.6	35.2	0.64
give out heat	0	1	57	147	2.34	72.6		0.609091	13.4	22	1.97095	47.5	24.1	0.5
renal inadequacy	0	0	75	110	2.29	150.3	20	0.656658	50.3	76.6	1.21767	38.6	31.7	0.5
Primary systemic amyloidosis	0	1	72	85	347.7	145	19	0.689516	51.3	74.4	1.44388	28.3	19.6	29.53
hypertensive renal disease	0	0	68	126	2.44	146	15	1.08235	18.4	17	1.19949	46.9	39.1	0.49
Chronic kidney disease, stage 4	0	1	50	120	2.1	367.9	10	0.768333	92.2	120	1.22358	30.1	24.6	10.63
Amyloidogenic renal impairment	0	0	61	101	2.26	45.1	5	0.29	1.1	34.8	1.80275	39.3	21.8	0.2
gouty arthritis	0	1	75	121	1.9	104.2	10	0.638393	57.2	89.6	0.853282	22.1	25.9	0.07
pneumonia	0	1	84	114	2.21	217.1	10	0.979087	51.5	52.6	1.43382	39	27.2	1.02
sense of suppression in the chest	0	1	47	78	2.05	125.4	10	1.04487	163	156	1	28.3	28.3	11.89
chronic nephritic syndrome	0	1	74	156	2.18	87.3	12	0.737374	21.9	29.7	1.2963	35	27	0.22
albuminuria	0	0	56	124	2.4	72.4	13	0.635294	16.2	25.5	1.59766	40.9	25.6	0.2
Chronic kidney disease stage 5	0	1	72	81	2.37	642.7	99	0.673953	370	549	0.805714	28.2	35	0.2
Coronary artery atherosclerotic heart disease	0	1	42	94	2.01	300.8	100	0.871963	93.3	107	1.18	23.6	20	27
albuminuria	0	1	56	141	2.23	141.6	25	0.95933	40.1	41.8	1.32759	38.5	29	22.91
renal inadequacy	0	1	68	130	2.45	319.7	11	0.699728	51.5	73.6	1.67568	37.2	22.2	10
nephrotic syndrome	0	0	65	129	2.12	57.1	12	0.70364	40.6	57.7	0.977169	21.4	21.9	0.24
Chronic kidney disease, stage 4	0	0	62	101	2.09	230.9	10	2.57534	376	146	1.04377	31	29.7	39.96
Type 2 diabetes	0	0	50	78	1.97	714.5	3	0.778325	158	203	0.988406	34.1	34.5	22.6
acute renal failure	0	0	68	77	1,97	714.1	5	2.01687	8.37	4.15	0.988406	34.1	34.5	22.6
albuminuria	0	0	86	141	2.06	71.8	2	0.842932	48.3	57.3	0.988406	34.1	34.5	10
albuminuria	0	1	64	120	2.45	84.1	6	0.491525	11.6	23.6	2.43915	46.1	18.9	0.31
toxuria	0	1	53	88	1.88	618.3	15	1.24138	216	174	0.938017	22.7	24.2	0.2
albuminuria	0	0	80	115	95.4	98.7	24	0.691542	55.6	80.4	1.32515	43.2	32.6	0.2
nephrotic syndrome	0	0	71	105	1.94	63.6	30	0.862669	44.6	51.7	0.822917	23.7	28.8	0.32
renal inadequacy	0	1	44	150	2.3	108.8	23	1.07491	28.7	26.7	1.37153	39.5	28.8	5.53
Hypertension; chronic kidney disease, stage 2	0	1	56	123	2.41	99.2	45	0.876344	32.6	37.2	1.31085	44.7	34.1	2.7
Diabetic nephropathy in stage IV	0	11	68	91	2.46	646.2	10	0.906542	97	107	1.16949	34.5	29.5	30.51
acute renal failure	0	1	73	89	1.99	147.8	23	1.84985	61.6	33.3	1.29493	28.1	21.7	0.17
renal inadequacy	0	1	82	136	2.31	245.2	44	0.42766	60.3	141	1.24425	43.3	34.8	10.65
Chronic kidney disease, stage 4	0	1	82	116	2.41	345.6	41	0.751497	251	334	1.18082	43.1	36.5	34.38
renal inadequacy	0	11	75	120	2.24	452.2	36	0.718349	78.3	109	1.4417	40.8	28.3	49.17
primary hypertension	0	1	80	139	2.16	81.7	34	0.701422	14.8	21.1	1.44223	36.2	25.1	0.55
renal inadequacy	0	0	72	111	2.23	266.7	22	0.879439	94.1	107	1.0086	35.2	34.9	103.84
Chronic kidney disease, stage 4	0	1	67	105	2.38	207.6	13	0.136364	15	110	0.854054	31.6	37	7.53
renal inadequacy	0	1	64	96	2.24	336	25	0.780822	114	146	1.14907	37	32.2	2.3
chronic renal insufficiency	0	0	80	100	2.21	291.5	26	0.770492	23.5	30.5	1.32031	33.8	25.6	47.98
albuminuria	0	0	24	109	2.21	65	18	0.521628	20.5	39.3	1.25448	35	27.9	0.2
Maintenance chemotherapy for malignant tumors	0	1	65	133	2.24	342.7	34	1.93289	57.6	29.8	1.26974	38.6	30.4	89.29
Type 2 diabetes	0	0	80	114	2.55	177.1	12	0.628118	55.4	88.2	1.50196	38.3	25.5	34
hydroncus	0	1	81	103	1.98	461.6	2	1.30556	188	144	0.947581	23.5	24.8	5.77
renal hypertension	0	1	69	97	2.4	144.2	4	1.02157	52.1	51	1.07092	30.2	28.2	0.76
acute renal insufficiency	0	1	84	100	2.04	432.6	5	1.28571	45	35	1.48624	32.4	21.8	12.1
chronic nephritic syndrome	0	0	66		2.19	66.3	6	0.764706	16.9	22.1	1.64019	35.1	21.4	0.31
chronic nephritis	0	1	67	98	2.29	103.7	7	0.369	73.8	200	1.76168	37.7	21.4	3.9
Chronic kidney disease stage 3; diabetes mellitus; hypertension; gout	0	1	75	126	2.31	162.5	8	0.672609	41.5	61.7	1.35692	44.1	32.5	12.6
hydroncus	0	1	85	132	2.07	55.2	9	0.829443	46.2	55.7	1.05882	30.6	28.9	2.3
renal inadequacy	0	1	58	102	2.38	98.9	10	0.748062	19.3	25.8	1.54225	43.8	28.4	0.5
Hyperuricemia; renal insufficiency	0	1	65	70	2.34	181.4	11	0.834437	50.4	60.4	1.51536	44.4	29.3	0.2
albuminuria	0	0	42	113	2.45	68	4	1.18274	23.3	19.7	1.12428	38.9	34.6	0.2
Acute renal dysfunction azochemia stage	0	0	63	87	3.33	91.3	3	4.26718	5.59	1.31	1.98485	39.3	19.8	16.2
albuminuria	0	1	31	164	2.35	102.7	12	0.602888	16.7	27.7	1.56897	45.5	29	0.2
renal inadequacy	0	1	73	126	2.36	196.6	34	1.70769	11.1	6.5	1.5	38.1	25.4	50.62
renal inadequacy	0	1	57	103	2.37	196.4	56	2.07609	76.4	36.8	1.44444	40.3	27.9	2.92
Chronic kidney disease, stage 4	0	1	73	104	2.25	316，4	21	1.44629	95.6	66.1	1.12538	36.8	32.7	0.92
renal inadequacy	0	1	50	102	1.83	235.9	22	1.21586	276	227	0.864734	17.9	20.7	3.46
Chronic kidney disease stage 5	0	0	80	135	2.09	281.9	25	1.16667	343	294	0.790761	29.1	36.8	19.5
Amyloidogenic renal impairment	0	0	66	119	2.13	82.6	51	2.05426	106	51.6	1.15814	24.9	21.5	0.2
membranous nephropathy	0	1	61	120	2.45	100.8	20	0.795918	78	98	0.925197	23.5	25.4	1.55
chronic nephritic syndrome	0	1	49	118	2.37	75.4	34	0.471939	18.5	39.2	0.936255	23.5	25.1	1.1
chronic renal failure	0	1	55	100	2.07	497.3	45	1.41361	81	57.3	1.29658	34.1	26.3	2.5
IgA nephroma	0	1	58	111	2.27	112.6	41	0.853748	46.7	54.7	1.17422	33.7	28.7	0.22
Type 2 diabetes	0	1	60	123	2.3	113.4	40	0.70451	45.3	64.3	1.18069	37.9	32.1	3.79
membranous nephropathy	0	0	65	102	2.14	71	38	0.00598131	12.8	2140	1.60633	35.5	22.1	0.12
acute renal insufficiency	0	1	71	125	2.25	932.8	35	0.585253	127	217	1.44558	42.5	29.4	1.25
renal inadequacy	0	0	80	102	2.19	137.1	32	0.935211	33.2	35.5	1.62917	39.1	24	7.52
being poisoned by agricultural chemicals	0	0	37	117	2.22	113.6	30	1.13889	20.5	18	1.98667	44.7	22.5	0.01
hydroncus	0	0	85	81	2.84	353	40	1.94175	10	5.15	1.38014	40.3	29.2	8.76
renal inadequacy	0	1	34	145	2.43	249.8	20	0.685155	42	61.3	1.53455	42.2	27.5	19.18
kidney stone	0	1	69	153	2.37	149.6	10	0.887574	30	33.8	1.52669	42.9	28.1	0.41
chronic renal failure	0	0	68	119	2.26	150	57	0.745763	176	236	1.01977	36.1	35.4	21.63
Chronic kidney disease, stage 3	0	1	52	150	2.27	98.9	4	0.589831	17.4	29.5	0.185714	40.3	217	0.2
renal inadequacy	0	1	83	116	2.4	169.2	23	0.851636	72.9	85.6	1.24691	40.4	32.4	0.27
And ANCA-associated vasculitis	0	1	78	113	102.9	169.2	56	0.851636	72.9	85.6	1.24691	40.4	32.4	3.27
Gout; Chronic kidney disease stage 4	0	0	73	142	2.22	257.3	10	0.940032	58	61.7	1.46296	39.5	27	0.3
toxuria	0	1	89	97	2.19	775.9	7	0.380783	107	281	1.02614	31.4	30.6	3
albuminuria	0	1	40	167	2.45	113.3	5	0.82151	35.9	43.7	1.19114	43	36.1	0.47
hydroncus	0	0	96	109	2.21	84.7	34	1.24913	71.7	57.4	1.26059	38.7	30.7	0.47
hyperkalemia	0	1	67	82	2.1	181	44	0.824621	48.9	59.3	1.22143	34.2	28	0.3
nephrotic syndrome	0	0	73	110	2.1	60.6	20	0.744681	38.5	51.7	1.1215	24	21.4	0.71
renal inadequacy	0	1	81	155	2.17	101.6	18	1.86104	150	80.6	1.52555	41.8	27.4	4.22
albuminuria	0	0	43	146	2.45	77	20	2.23228	14.8	6.63	1.52555	41.8	27.4	0.2
IgA nephroma	0	1	40	138	2.16	71.8	4	0.69395	19.5	28.1	1.71366	38.9	22.7	0.2
albuminuria	0	1	53	153	2.17	93.9	23	2.35915	134	56.8	1.73009	39.1	22.6	1.46
chronic renal insufficiency	0	0	59	105	2.33	285.7	15	0.875934	58.6	66.9	1.10645	34.3	31	5.41
Chronic kidney disease, stage 3	0	1	66	116	2.12	190.4	10	0.69382	24.7	35.6	2.13333	38.4	18	5.02
acute renal insufficiency	0	1	68	109	2.45	190.4	6	0.829016	160	193	2.13333	38.4	18	2.5
albuminuria	0	1	28	146	2.39	79.9	8	0.681614	15.2	22.3	1.50169	44.3	29.5	0.2
nephrotic syndrome	0	1	62	138	1.97	62.6	10	1.01434	28.3	27.9	1.19635	26.2	21.9	2.5
albuminuria	0	1	59	154	2.47	93.4	12	0.530547	16.5	31.1	1.40705	43.9	31.2	0.2
chronic nephritic syndrome	0	0	61	112	2.06	95.4	15	0.819615	46.8	57.1	1.19718	34	28.4	0.46
renal inadequacy	0	1	52	69	1.77	385.8	25	1.24611	88.1	70.7	1.54505	34.3	22.2	24.64
diabetes mellitus	0	0	61	143	2.18	54.6	22	0.65445	12.5	19.1	2.28402	38.6	16.9	0.2
Diabetic nephropathy at stage V	0	0	50	82	2.26	511.9	20	0.52349	156	298	0.914081	38.3	41.9	4.5
Chronic kidney disease stage 5	0	1	86	75	2.33	418.1	29	0.863636	190	220	1.30328	31.8	24.4	23.56
allergic purpura	0	0	73	103	2.07	78.3	30	0.904328	39.7	43.9	1.26471	30.1	23.8	0.2
Type 2 diabetic nephropathy at stage IV	0	1	58	92	2.17	267，2	15	0.66	72.6	110	1.2973	38.4	29.6	13.21
primary hypertension	0	1	48	141	2.4	117.9		0.764493	21.1	27.6	1.95618	49.1	25.1	1.8
Type 2 diabetic nephropathy	0	0	72	82	2.07	87.7		1.15234	59	51.2	1.03663	28.3	27.3	4.57
Chronic kidney disease, stage 4	0	0	66	82	2.07	87.7		1.15234	59	51.2	1.01434	28.3	27.9	2.5
Chronic kidney disease, stage 4	0	1	61	89	2.14	202.7		2.19522	55.1	25.1	1.96739	36.2	18.4	6.49
renal inadequacy	0	1	78	105	2.08	128.6		0.619159	26.5	42.8	1.07074	33.3	31.1	8.92
Type 2 diabetes mellitus is associated with renal complications	0	1	80	154	2.04	87.3		1.03836	37.9	36.5	1.49091	41	27.5	0.82
acute renal failure	0	1	57	106	2.26	50.3		0.700508	138	197	1.25159	39.3	31.4	0.99
renal inadequacy	0	0	73	68	1.93	930.7	38	1.83871	4.56	2.48	1.36596	32.1	23.5	21.48
Chronic kidney disease stage 5	0	0	61	83	1.28	741.3		0.662411	93.4	141	1.22552	41.3	33.7	29.04
renal inadequacy	0	1	91	83	2.09	112.8		0.414155	31.6	76.3	1.69274	30.3	17.9	3.1
Membranous nephropathy; hyperlipidemia; nephrotic syndrome	0	1	51	144	2.45	76.9	21	0.208333	0.5	2.4	1.38298	32.5	23.5	2.5
Chronic kidney disease	0	1	53	142	2.35	62.8	21	0.538462	3.5	6.5	1.15564	29.7	25.7	2.56
Type 2 diabetic nephropathy	0	1	74	122	2.16	333.6	20	0.75	4.5	6	1.32218	31.6	23.9	27.2
nephroma	0	1	78	110	2.32	84.7	20	2.35294	10.8	4.59	1.23	31.4	25.5	3.7
nephroma	0	0	53	122	2.48	124.9	15	2.55947	58.1	22.7	1.06	37.2	35.1	0.61
nephroma	0	1	66	140	2.14	107	35	1.91667	23	12	1.35	37.3	27.6	0.2
Immunoglobulins were elevated	0	0	54	127	2.34	60.1	32	1.70573	13.1	7.68	1.19	44.5	37.4	2.3
Aberrant globulin	0	0	60	121	2.14	54.3	66	11.1111	29	2.61	0.82	37.2	45.4	1.2
Aberrant globulin	0	1	56	149	2.33	80.5	70	1.6134	31.3	19.4	1.22	43.3	35.5	1
ANCA-associated vasculitis; hypertension; renal anemia; hyperuricemia	0	1	78	106	2.27	172.9		0.926702	53.1	57.3	1.51	29.5	19.6	3.27
Aberrant globulin	0	1	79	131	2.2	70.9	20	11.4583	27.5	2.4	1.424	35.6	25	2.3
Increased globulin	0	1	77	142	1.98	76.1	18	0.349219	4.47	12.8	1.47	45.6	31.1	3.3
IGA nephroma	0	0	44	119	2.08	58.4	20	1.07602	18.4	17.1	1.19	33.8	28.3	0.31
Chronic kidney disease at stage 4	0	0	61	79	2.36	605.2	21	0.294634	60.4	205	1.29	39	30.3	29.4
Urgent nephritis	0	0	56	78	1.87	555.3	45	0.320652	59	184	1.01	27.2	27	1.2
Increased globulin	0	1	77	141	142	120	30	0.349219	4.47	12.8	1.19	25.6	21.5	3.3
nephroma	0	1	56	133	40	75.9	20	1.28571	4.5	3.5	0.9	34.9	38.9	1.2
Nephrotic syndrome with microlesional glomerulonephritis	0	1	57	137	1.91	78.4	12	2.12082	148.5	70.02	0.45	15.1	33.5	1.4
Chronic kidney disease stage 5	0	1	48	106.2	2.133	67.86	30.6	0.471939	16.65	35.28	0.936255	21.15	22.59	0.99	0.9
infection of biliary tract	0	1	83	90	1.863	447.57	40.5	1.41361	72.9	51.57	1.29658	30.69	23.67	2.25
Decpensated stage of cirrhosis after hepatitis B	0	0	71	99.9	2.043	101.34	36.9	0.853748	42.03	49.23	1.17422	30.33	25.83	0.198
Right side of the encapsulated empyema	0	1	76	110.7	2.07	102.06	36	0.70451	40.77	57.87	1.18069	34.11	28.89	3.411
Chronic kidney disease stage 5	0	0	54	91.8	1.926	63.9	34.2	0.00598131	11.52	1926	1.60633	31.95	19.89	0.108
decompensated phase of alcoholic cirrhosis	0	1	56	112.5	2.025	839.52	31.5	0.585253	114.3	195.3	1.44558	38.25	26.46	1.125
pulmonary embolism	0	0	72	91.8	1.971	123.39	28.8	0.935211	29.88	31.95	1.62917	35.19	21.6	6.768
Multiple intrahepatic biliary stones associated with cholangitis	0	0	52	105.3	1.998	102.24	27	1.13889	18.45	16.2	1.98667	40.23	20.25	0.009
dilated cardiomyopathy	0	0	74	72.9	2.556	317.7	36	1.94175	9	4.635	1.38014	36.27	26.28	7.884
decompensated phase of alcoholic cirrhosis	0	1	58	130.5	2.187	224.82	18	0.685155	37.8	55.17	1.53455	37.98	24.75	17.262
Turn off ileostomy	0	1	72	137.7	2.133	134.64	9	0.887574	27	30.42	1.52669	38.61	25.29	0.369
Multiple injuries	0	0	43	107.1	2.034	135	51.3	0.745763	158.4	212.4	1.01977	32.49	31.86	19.467
Right pneumonia	0	0	82	135	2.043	89.01	3.6	0.589831	15.66	26.55	0.185714	36.27	195.3	0.18
Acute aggravation of chronic cardiac insufficiency	0	0	88	104.4	2.16	152.28	20.7	0.851636	65.61	77.04	1.24691	36.36	29.16	0.243
hemorrhagic shock	0	0	85	101.7	92.61	152.28	50.4	0.851636	65.61	77.04	1.24691	36.36	29.16	2.943
Chronic kidney disease stage 5	0	1	77	127.8	1.998	231.57	9	0.940032	52.2	55.53	1.46296	35.55	24.3	0.27
Left pneumonia	0	1	78	87.3	1.971	698.31	6.3	0.380783	96.3	252.9	1.02614	28.26	27.54	2.7
metastasizing septicemia	0	1	77	135	2.07	97.92	20.7	1.07491	25.83	24.03	1.37153	35.55	25.92	4.977
Slow plus acute liver failure	0	1	49	110.7	2.169	89.28	40.5	0.876344	29.34	33.48	1.31085	40.23	30.69	2.43
Decpensated stage of cirrhosis after hepatitis B	0	1	46	81.9	2.214	581.58	9	0.906542	87.3	96.3	1.16949	31.05	26.55	27.459
Breathing and cardiac arrest	0	0	81	80.1	1.791	133.02	20.7	1.84985	55.44	29.97	1.29493	25.29	19.53	0.153
Acetal respiratory failure	0	0	86	122.4	2.079	220.68	39.6	0.42766	54.27	126.9	1.24425	38.97	31.32	9.585
hemiplegic paralysis	0	0	58	104.4	2.169	311.04	36.9	0.751497	225.9	300.6	1.18082	38.79	32.85	30.942
Chronic kidney disease stage 5	0	1	57	108	2.016	406.98	32.4	0.718349	70.47	98.1	1.4417	36.72	25.47	44.253
Coronary artery atherosclerotic heart disease	0	0	89	125.1	1.944	73.53	30.6	0.701422	13.32	18.99	1.44223	32.58	22.59	0.495
Respiratory and cardiac arrest after CPR	0	1	48	99.9	2.007	240.03	19.8	0.879439	84.69	96.3	1.0086	31.68	31.41	93.456
Coronary artery atherosclerotic heart disease	0	1	72	1.971	73.53	99	1.7234	40.5	21.15	1.251	37.6	24.39	0.18	4.581
pneumonia	0	0	95	1.953	89.55	27	1.9837	36.5	16.56	1.251	29.8	19.26	0.18	0.36
nephrotic syndrome	0	0	76	2.025	62.46	10.8	1.39444	25.1	16.2	1.458	41.7	23.22	1.17	1.476
Pulmonary abscess was associated with pneumonia	0	1	54	2.169	203.76	9.9	1.71778	7.73	4.05	1.485	45.4	24.75	0.549	0.18
acute renal failure	0	1	76	1.665	56.61	51.3	1.81868	6.62	3.276	0.576	19.3	27.27	1.755	0.18
Sepsis (intraperitoneal infection)	0	0	64	1.791	70.92	41.4	1.29657	5.29	3.672	1.062	26	19.89	0.54	2.7
bacterial pneumonia	0	1	77	1.971	91.98	40.5	1.79251	6.22	3.123	1.215	42.1	28.17	0.531	0.423
acute heart failure	0	0	94	99	1.89	54.54	18	0.744681	34.65	46.53	1.1215	21.6	19.26	0.639
pneumonia	0	1	41	139.5	1.953	91.44	16.2	1.86104	135	72.54	1.52555	37.62	24.66	3.798
