# Supplementary material for: Common laboratory results-based artificial intelligence analysis achieves accurate classification of plasma cell dyscrasias
Source: PeerJ journal article supplement (doi:10.7717/peerj.18391), 2024-11-04
Supplement: Subtype_classification_data_set.xlsx [file Subtype_classification_data_set.xlsx]

## Sheet: subtype dates
病人ID	diagnosis	immunoglobulin	HB	Serum calcium	Serum creatinine	light chain κ/λ ratio	light chain κ	light chain λ	Immunofixation electrophoresis	Immunofixation electrophoresis	CD27	CD117	CD38	CD19	CD138
91521769	MM	48.7	119	2.85	75.6	17.8351	17.3	0.97	G	k	-1	-1	1	-1	1
91508581	MM	34.6	74	2.17	474	0.0679379	48.1	708	A	λ	-1	-1	1	-1	1
90295484	MM	46.1	95	2.33	62.9	0.0169502	8.17	482	G	λ	-1	1	1	-1	1
11019778	MM	56.7	71	2.27	77.1	10.0943	32.1	3.18	G	k	-1	1	1	-1	1
15037918	MM	39.9	85	2.48	45.6	0.155046	1.69	10.9	G	λ	-1	1	1	-1	1
13864733	MM	36.5	118	2.45	145	0.280488	11.5	41	A	λ	-1	-1	1	-1	1
13699485	MM	40	153	2.89	85.5	0.272195	5.58	20.5	G	λ	-1	-1	1	-1	1
90312006	MM	43.5	85	2.33	86.4	52.7586	30.6	0.58	A	k	-1	-1	1	-1	1
91425587	MM	69.3	46	1.95	61.4	0.00778032	0.34	43.7	G	λ	-1	-1	1	-1	1
13307928	MM	78.6	98	2.38	112	0.0717391	2.64	36.8	A	λ	1	-1	1	-1	1
20467026	MM	30.5	97	2.07	638.9	4.6	20.7	4.5	A	k	1	-1	1	-1	1
20154006	MM	36.6	88	2.09	116.6	0.038806	1.82	46.9	G	λ	1-	-1	1	-1	1
90713495	MM	59.3	95	2.29	66.8	34.0777	35.1	1.03	A	k	1-	-1	1	-1	1
14210351	MM	31.7	90	1.96	35.5	0.0783282	2.53	32.3	G	λ	-1	1	1	-1	1
11362766	MM	34.5	84	2.86	152.9	5.06077	91.6	18.1	M	λ	-1	-1	1	-1	1
91716361	MM	45.4	89	2.5	82.6	0.161875	2.59	16	A	λ	1	1-	1	-1	1
90626661	MM	38.5	127	1.88	91.7	75.5	377.5	5	G	k	1	-1	1	-1	1
90907692	MM	30.5	80	2.31	719	0.171895	2.63	15.3	A	k	-1	-1	1	-1	1
91229622	MM	50.2	67	2.86	240	0.0267769	1.62	60.5	A	k	-1	-1	1	-1	1
20696569	MM	40.5	99	2.4	136	4.94074	66.7	13.5	A	k	-1	-1	1	-1	1
90130921	MM	31.9	107	2.19	73.5	8.98089	141	15.7	A	k	-1	-1	1	-1	1
91934536	MM	34.5	112	2.19	80.2	0.157407	1.7	10.8	A	k	-1	-1	1	-1	1
20949596	MM	57.2	71	2.04	68.2	82.7869	101	1.22	A	k	-1	1	1	-1	1
91166369	MM	63.1	90	2	56.6	39.3671	62.2	1.58	G	k	-1	1-	1	-1	1
90512319	MM	45.6	98	2.23	104	0.269139	22.5	83.6	G	λ	-1	-1	1	-1	1
90938507	MM	36.7	101	2.29	86.2	5.10903	16.4	3.21	A	k	-1	-1	1	-1	1
90161084	MM	45.9	88	2.24	121.5	0.285612	3.97	13.9	A	k	-1	-1	1	-1	1
90907692	MM	30.5	80	2.31	719	0.171895	2.63	15.3	A	k	-1	1-	1	-1	1
20179616	MM	26.1	84	2.06	61.7	12.6538	32.9	2.6	A	k	-1	-1	1	-1	1
91014535	MM	18.8	98	2.18	66.2	5.1506	17.1	3.32	A	k	-1	-1	1	-1	1
91229622	MM	50.2	67	2.86	240	0.0267769	1.62	60.5	A	k	-1	1-	1	-1	1
20696569	MM	40.5	99	2.4	136	4.94074	66.7	13.5	A	k	-1	1-	1	-1	1
90130921	MM	31.9	107	2.19	73.5	8.98089	141	15.7	A	k	-1	1-	1	-1	1
20949596	MM	57.2	71	2.04	68.2	82.7869	101	1.22	A	k	-1	1-	1	-1	1
91145391	MM	20.2	110	2.4	164	5.59245	1482	265	A	k	-1	-1	1	-1	1
21085743	MM	45	114	2.36	98.6	0.288235	2.45	8.5	G	λ	1	-1	1	-1	1
12079503	MM	39.5	91	2.14	90.5	0.296117	1.83	6.18	A	λ	1	-1	1	-1	1
90177981	MM	55.8	102	2.85	65.1	85.6436	346	4.04	A	k	1	-1	1	-1	1
91750523	MM	33.3	86	2.02	44.7	17.4667	26.2	1.5	A	k	-1	-1	1	-1	1
91905602	MM	48.3	97	2.56	82.4	131.636	72.4	0.55	G	k	-1	0	1	-1	1
91771218	MM	49	99	2.28	241	551.724	51200	92.8	G	k	1	-1	1	-1	1
13912496	MM	38	107	2.31	69.9	3.63036	33	9.09	A	λ	1	-1	1	-1	1
91714363	MM	45	96	2.69	85.5	8.74317	160	18.3	G	k	1	-1	1	-1	1
20526028	MM	34.5	102	2.05	63	6.68868	7.09	1.06	G	k	1	-1	1	-1	1
91862690	MM	32.5	70	2.02	44.3	7.22414	83.8	11.6	A	k	1	-1	1	-1	1
91364282	MM	40.5	51	2.16	116	8.13187	22.2	2.73	A	k	0	-1	1	-1	1
90230382	MM	35.5	65	2.31	73.7	0.138732	1.97	14.2	A	λ	1	-1	1	-1	1
20887473	MM	39.5	83	2.34	121.8	77.5676	287	3.7	G	k	-1	1	1	-1	1
91353430	MM	40.5	67	2.15	75.7	6.73913	124	18.4	G	λ	-1	1	1	-1	1
126331402	MM	42.5	95	3.45	274.6	7.57273	83.3	11	G	λ	-1	1	1	-1	1
90802639	MM	35.5	90	2.33	66.5	3.73077	19.4	5.2	A	k	-1	-1	1	-1	1
91281965	MM	40.4	99	2.37	75.4	0.230939	4.18	18.1	A	λ	-1	-1	1	-1	1
92057478	MM	34.5	85	2.8	171.8	13.4977	115	8.52	G	k	-1	-1	1	-1	1
91638297	MM	40.5	61	1.75	84.5	5.6087	25.8	4.6	G	k	-1	-1	1	-1	1
91632344	MM	39.5	77	3.33	245.9	222.699	3630	16.3	G	k	-1	-1	1	-1	1
91602140	MM	30.5	93	2.26	158	5.64417	184	32.6	G	k	-1	-1	1	-1	1
20832070	MM	35.5	78	3.64	162.7	0.2625	2.94	11.2	A	λ	-1	-1	1	-1	1
90870977	MM	35.7	68	1.89	183.5	0.0234483	0.68	29	G	λ	0	-1	1	-1	1
14254166	MM	45.5	54	2.19	591.5	0.0659259	1.78	27	D	λ	1	-1	1	-1	1
91023500	MM	32.2	86	2.05	119.6	0.0362903	2.7	74.4	G	λ	0	-1	1	-1	1
91612140	MM	45.4	84	2.15	77.1	3.72917	35.8	9.6	G	λ	-1	-1	1	-1	1
91279892	MM	65.8	82	2.1	61.3	153.051	90.3	0.59	G	k	-1	1	1	-1	1
12874108	MM	45.5	67	2.43	87.3	0.291457	5.8	19.9	A	λ	-1	1	1	-1	1
90329419	MM	35.8	86	2.54	50.1	23.9114	64.8	2.71	A	k	0	-1	1	-1	1
90900578	MM	56.8	94	2.16	90.2	128.462	66.8	0.52	G	k	0	-1	1	-1	1
90649283	MM	58.1	80	2.01	62.8	0.0636364	1.82	28.6	A	λ	1	-1	1	-1	1
90352336	MM	34.5	98	2.28	70.1	11.1675	22	1.97	A	k	1	-1	1	-1	1
20179616	MM	40.5	88	2.01	69.2	11.1111	31	2.79	A	k	1	0	1	-1	1
90620445	MM	38.5	85	2.22	55.1	10.3727	167	16.1	A	k	1	-1	1	-1	1
21052143	MM	40.5	113	2.32	65.8	15.1685	135	8.9	A	k	-1	-1	1	-1	1
90153628	MM	13.5	99	1.46	129	0.335058	2.59	7.73	A	k	-1	0	1	-1	1
20094361	MM	15.6	131	2.33	143.1	22.7559	28.9	1.27	A	k	-1	-1	1	-1	1
90971684	MM	48	102	2.34	70.5	0.0789744	3.08	39	A	k	1	-1	1	-1	1
90904591	MM	24.5	84	2.21	122.3	9.31655	25.9	2.78	A	k	1	-1	1	-1	1
20179616	MM	32.4	84	2.06	61.7	12.6538	32.9	2.6	A	k	-1	-1	1	-1	1
91014535	MM	36.5	98	2.18	66.2	5.1506	17.1	3.32	A	k	-1	-1	1	-1	1
91229622	MM	30.8	67	2.86	240	0.0267769	1.62	60.5	A	k	-1	1-	1	-1	1
20696569	MM	45.8	99	2.4	136	4.94074	66.7	13.5	A	k	-1	1-	1	-1	1
90130921	MM	48.9	107	2.19	73.5	8.98089	141	15.7	A	k	-1	1-	1	-1	1
20949596	MM	35	71	2.04	68.2	82.7869	101	1.22	A	k	-1	1-	1	-1	1
91145391	MM	31.2	110	2.4	164	5.59245	1482	265	A	k	-1	-1	1	-1	1
91095544	MM	31.9	65	2.98	230	111.194	74.5	0.67	G	λ	1	-1	1	-1	1
20201182	MM	54.3	90	2.15	110	0.0108859	14.5	1332	A	λ	1	-1	1	-1	1
91173924	MM	47.6	126	2.43	99.5	0.0447619	14.1	315	A	k	1	-1	1	-1	1
90873071	MM	45.1	82	2.06	79.5	0.18494	3.07	16.6	A	k	-1	-1	1	-1	1
91934536	MM	78.5	112	2.19	80.2	0.157407	1.7	10.8	G	k	-1	0	1	-1	1
91840734	MM	65.4	122	2.25	66.6	0.014434	15.3	1060	G	k	1	-1	1	-1	1
90298406	MM	45.6	75	2.28	63.8	0.0133163	1.04	78.1	A	λ	1	-1	1	-1	1
90723520	MM	98.6	90	2.19	67.7	5.20179	11.6	2.23	G	k	1	-1	1	-1	1
91224306	MM	89.5	107	1.97	62	4.0449	99.1	24.5	G	k	1	-1	1	-1	1
91508362	MM	67.6	126	2.12	55.9	0.171564	3.62	21.1	A	k	1	-1	1	-1	1
11065322	MM	56.4	76	2.13	68.3	27.7483	41.9	1.51	A	k	0	-1	1	-1	1
91482115	MM	45.6	65	2.16	295	143.929	80.6	0.56	A	λ	1	-1	1	-1	1
92053293	MM	89	98	2.8	96.9	0.0766026	2.39	31.2	G	k	-1	1	1	-1	1
91854196	MM	82.3	88	2.45	81	0.720096	30.1	41.8	G	λ	-1	1	1	-1	1
13774639	MM	84.5	110	2.4	69.3	16.6327	32.6	1.96	G	λ	-1	1	1	-1	1
91938867	MM	67.5	102	2.65	55.5	3.78409	9.99	2.64	A	k	-1	-1	1	-1	1
91517382	MM	59.5	115	2.13	58	16.5517	33.6	2.03	A	λ	-1	-1	1	-1	1
92042792	MM	55.6	98	3.59	323.7	0.15119	3.81	25.2	G	k	-1	-1	1	-1	1
13832819	MM	34.5	77	2.25	445.2	12.439	20.4	1.64	G	k	-1	-1	1	-1	1
211250277	MM	67.4	94	2.13	49.5	0.0741107	3.75	50.6	G	k	-1	1	1	-1	1
90783399	MM	63.2	98	2.03	59.4	68.4252	86.9	1.27	G	λ	-1	1	1	-1	1
92049916	MM	85.3	90	2.45	138.9	79.5789	75.6	0.95	A	λ	-1	-1	1	-1	1
91960592	MM	45.5	45	2.03	114.1	391.667	4230	10.8	G	λ	0	-1	1	-1	1
91956390	MM	49.7	98	2.3	108.8	2.63158	175	66.5	D	λ	1	-1	1	-1	1
91777316	MM	54.3	112	2.15	33.2	0.0153532	8.26	538	G	λ	0	-1	1	-1	1
11773537	MM	78.5	99	2.78	116	3.34101	14.5	4.34	G	λ	-1	-1	1	-1	1
20285464	MM	80.5	100	1.93	54.1	0.221725	6.94	31.3	G	k	-1	1	1	-1	1
91545494	MM	43.2	71	2.11	266	0.144105	6.6	45.8	A	λ	-1	1	1	-1	1
12386920	MM	76.4	99	2.17	106.8	3.18072	13.2	4.15	A	k	0	-1	1	-1	1
92024621	MM	80.4	99	2.26	48.4	0.229204	2.59	11.3	G	k	0	-1	1	-1	1
90538217	MM	56.8	128	1.76	50.5	11.6667	89.95	7.71	A	λ	1	-1	1	-1	1
20993037	MM	60.5	114	2.58	63.7	20.8943	25.7	1.23	A	k	1	-1	1	-1	1
92042792	MM	39.8	121	4.07	291.4	0.0295864	2.79	94.3	A	k	1	0	1	-1	1
20836834	MM	32.5	134	2.16	52.6	3.65116	15.7	4.3	A	k	1	-1	1	-1	1
00797783	MM	30.8	94	2.23	57.22	17.98	89.9	5	A	k	-1	-1	1	-1	1
00538747	MM	38.9	63	2.32	328	0.00272727	12.9	4730	A	k	-1	0	1	-1	1
00684360	MM	40.5	44	2.14	68.62	128.959	9040	70.1	A	k	-1	-1	1	-1	1
00764745	MM	42.5	6.7	2.14	104.76	176.667	5300	30	A	k	1	-1	1	-1	1
00596189	MM	57.8	63	2.09	50.08	0.0890547	179	2010	A	k	1	-1	1	-1	1
90908597	LPL/ WM	20.5	64	3.29	140.9	3.55224	23.8	6.7	A	k	1	-1	1	1	1
20109991	LPL/ WM	10.7	65	1.89	67.5	3.88889	35	9	A	k		1
12605937	LPL/ WM	21.4		2.21	67.2	7.225	28.9	4	M	k	-1	-1	1	1	1
12342153	LPL/ WM	10.2	174	2.34	81.1	0.104918	12.8	122	M	λ	-1	-1	1	1	-1
21114460	LPL/ WM	23.5	74	2.17	84.5	5.16	25.8	5	M	k	-1	-1	1	1	-1
20559926	LPL/ WM	21.3	134	2.39	88.4	10.7558	18.5	1.72	M	k	-1	-1	1	1	-1
90709262	LPL/ WM	49.6	110	2.32	75.3	8.5618	38.1	4.45	M	k	-1	-1	1	1	-1
91609856	LPL/ WM	9.86	98	2.23	290	1.33333	45.6	34.2	M	λ	-1	-1	1	1	-1
91300527	LPL/ WM	39.3	56	2.51	123	9.41176	33.6	3.57	M	k	-1	-1	1	1	-1
91258791	LPL/ WM	15.6	76	2.02	102.4	3.75	16.5	4.4	G	k	-1	-1	1	1	-1
15186010	LPL/ WM	20.6	103	2.45	92	4.82222	21.7	4.5	M	k	-1	-1	1	1	-1
90734884	LPL/ WM	10.1	123	2.33	68.4	0.498477	4.91	9.85	M	λ	-1	-1	1	1	-1
13318399	LPL/ WM	6.9	62	2.1	68.6	5.70297	57.6	10.1	M	k	-1	-1	1	1	-1
13828077	LPL/ WM	24.5	57	2.22	112.5	5.65495	17.7	3.13	M	k	-1	-1	-1	1	-1
20568047	LPL/ WM	17.1	92	2.27	303.6	8.50575	22.2	2.61	M	k	-1	-1	-1	1	-1
20782551	LPL/ WM	10.2	68	2.08	50.6	0.544365	4.54	8.34	M	λ	-1	-1	1-	1	-1
91037809	LPL/ WM	3.39	34	2.14	56.4	3.29621	14.8	4.49	M	k	-1	-1	-1	1	-1
91376165	LPL/ WM	3.2	71	1.9	67.9	0.868293	17.8	20.5	M	λ	-1	-1	1	1	-1
91387876	LPL/ WM	8.07	111	2.26	68.4	4.375	24.5	5.6	M	k	-1	-1	1-	1	-1
12876668	LPL/ WM	10.1	149	2.37	87.3	8.16279	35.1	4.3	M	k	-1	-1	1	1	-1
12143576	LPL/ WM	15.2	137	1.91	88.6	2.12082	165	77.8	M	k	-1	-1	1-	1	-1
14413781	LPL/ WM	202	109	2.13	49.3	0.212568	3.89	18.3	M	λ	-1	-1	1-	1	-1
91107645	LPL/ WM	42.5	100	2.21	40.2	0.063871	2.97	46.5	M	λ	-1	-1	-1	1	-1
90897661	LPL/ WM	9.82	110	2.45	57.8	5.11696	175	34.2	M	k	1	-1	1	1	1
01211619	LPL/ WM	16.7	148	2.12	78	3.63	11.4	3.14	M	k	1	-1	1	1	-1
01269976	LPL/ WM	62.8	98	2.17	89	4.4	220	50	M	k	1	1		1	-1
01275376	LPL/ WM	22.7	56	2.03	78	7.92982	22.6	2.85	M	k	-1	-1	1	1	1
01280528	LPL/ WM	11.8	145	2.27	124	4.16425	8.62	2.07	M	k	-1	-1	1	1	1
01365827	LPL/ WM	43.4	82	2.04	67	0.111957	4.12	36.8	M	k	-1	-1	1	1	1
01366869	LPL/ WM	11.5	110	2.37	86	2.391	6.91	2.89	M	k	-1	-1	1	1	1
01370100	LPL/ WM	144	98	2.14	112	26.9737	41	1.52	M	k	-1	-1	1	1	1
01397536	LPL/ WM	6.9	67	2.1	76	12.5	28	2.24	M	k	-1	-1	1	1	1
90689452	LPL/ WM	7.68	87	2.41	560	5.14925	34.5	6.7	M	k	-1	-1	1	1	1
12525034	LPL/ WM	10.5	48	2.37	73.1	4	36	9	M	k	-1	-1	1	1	1
14205078	LPL/ WM	20.5	100	2.95	59.1	7.25	29	4	M	λ	-1	-1	1	1	1
14380537	LPL/ WM	20.6	99	2.87	291	0.118852	14.5	122	M	k	-1	-1	1	1	1
90949693	LPL/ WM	5.8	90	2.07	609	5.3	26.5	5	M	λ	-1	-1	-1	1	1
90925961	LPL/ WM	3.12	93	2.38	416	11.3372	19.5	1.72	M	λ	1	-1	-1	1	1
92216531	LPL/ WM	23.1	88	2.3	164	8.78652	39.1	4.45	M	λ	1	-1	1-	1	1
90857577	LPL/ WM	25.6	82	2.28	71	0.107377	13.1	122	M	k	1	-1	-1	1	1
92036537	LPL/ WM	16.7	87	2.49	259	9.69188	34.6	3.57	M	λ	1	1	1	1	1
91373646	LPL/ WM	15.9	125	1.74	63.6	3.97727	17.5	4.4	M	k	1	1	1	1	1
91944171	LPL/ WM	16.5	93	2.4	592	5.22222	23.5	4.5	M	k	1	1	1	1	1
91967359	LPL/ WM	16.1	105	2.29	39.7	0.679188	6.69	9.85	M	λ	1	1	1	1	1
92200870	LPL/ WM	18.8	88	2.18	188.1	5.83168	58.9	10.1	M	k	1	1	1	1	1
92205049	LPL/ WM	20.5	85	2.17	121.8	6.35783	19.9	3.13	M	k	1	-1	1	1	1
92203293	LPL/ WM	20.6	73	2.18	82.2	9.00383	23.5	2.61	M	k	1	-1	1	1	1
90967300	LPL/ WM	11.9	110	2.13	164.5	0.664269	5.54	8.34	M	k	1	-1	1	1	1
14147922	LPL/ WM	17.9	102	2.33	51.3	3.47439	15.6	4.49	M	k	1	-1	1	1	1
91506149	LPL/ WM	20.2	82	2.29	59.4	6.70498	17.5	2.61	M	k	1	-1	1	1	1
91757343	LPL/ WM	25	87	1.75	46.6	2.21823	18.5	8.34	M	k	1	-1	1	1	1
90794372	LPL/ WM	19.5	54	1.87	50.4	10.0445	45.1	4.49	M	λ	1	-1	1	1	1
91202130	LPL/ WM	15.8	71	1.97	93.4	2.28792	178	77.8	M	λ	1	-1	1	1	1
91199130	LPL/ WM	23.3	108	2.45	270.2	0.321858	5.89	18.3	M	λ	1	-1	1	1	1
91191845	LPL/ WM	18.9	83	2.29	383.5	0.076129	3.54	46.5	M	k	-1	-1	1	1	1
90705864	LPL/ WM	29	113	2.24	78.7	0.0826923	4.3	52	M	k	-1	-1	1	1	1
13376322	LPL/ WM	18	100	2.25	69.3	3.26087	13.5	4.14	M	k	1	1	1	1	1
91918839	LPL/ WM	25	93	2.17	160.5	4.09259	221	54	M	λ	1	1	1	1	1
10657153	LPL/ WM	22.5	98	2.33	106.1	5.94458	23.6	3.97	M	λ	1	1	1	1	1
92179455	LPL/ WM	15.5	110	2.19	82.2	3.14332	9.65	3.07	M	k	1	1	1	1	1
92168918	LPL/ WM	10.4	68	2.19	54.8	0.136533	5.12	37.5	M	k	1	1	1	1	1
90560445	LPL/ WM	24.5	128	2.04	111.42	1.9563	7.61	3.89	M	k	1	1	1	1	1
90178859	LPL/ WM	15.6	46	2	65	17.0635	43	2.52	M	k	1	-1	1	1	1
92177418	LPL/ WM	23.5	69	2.3	61.44	9.25926	30	3.24	M	λ	1	-1	1	1	1
91725787	LPL/ WM	10.5	65	4.57	102.88	11.7647	40	3.4	M	k	-1	-1	1	1	1
92152791	LPL/ WM	15.5	56	2.06	88	10.8696	45	4.14	M	k	-1	-1	1	1	1
92166556	LPL/ WM	13.5	95	2.23	93.57	0.3	16.5	55	M	k	-1	-1	1	1	1
92161022	LPL/ WM	15.5	137	1.92	83.08	5.06494	19.5	3.85	M	k	1	-1	1	1	1
92170641	LPL/ WM	22.2	90	2.31	104.61	6.67752	20.5	3.07	M	λ	1	-1	1	1	1
92174512	LPL/ WM	15.5	49	2.38	58.8	1.14815	46.5	40.5	M	λ	1	-1	1	1	1
90567183	LPL/ WM	20.6	80	2.22	187	46.2725	180	3.89	M	k	1	-1	1	1	1
92114700	LPL/ WM	5.8	66	2.33	110	3.945	7.89	2	M	k	1	-1	1	1	1
91694135	LPL/ WM	3.12	89	2.31	72.1	2.47321	5.54	2.24	M	k	1	-1	1	1	1
14393451	LPL/ WM	16.6	57	2.17	209.9	4.14474	6.3	1.52	M	k	1	-1	1	1	1
91905932	MGUS	2.63	126	2.25	163.3	126	2.25	163.3	A	k	1	-1	1	-1	1
91682437	MGUS	6.9	142	2.14	73.3	142	2.14	73.3	A	λ	1	-1	1	-1	1
20126285	MGUS	7.68	110	2.26	43.1	110	2.26	43.1	A	λ	1	1	1	-1	1
91091017	MGUS	10.5	67	1.82	491	67	1.82	491	A	k	1	1	1	-1	1
90357584	MGUS	20.5	129	2.21	80.2	129	2.21	80.2	G	λ	1	1	1	-1	1
20542723	MGUS	20.6	114	2.39	84.8	114	2.39	84.8	G	λ	1	-1	1	-1	1
13076573	MGUS	5.8	108	2.13	72.1	108	2.13	72.1	G	k	1	1	1	-1	1
92139666	MGUS	3.12	76	1.87	555.3	76	1.87	555.3	A	λ	1	-1	1	-1	1
14123700	MGUS	16.6	126	2.13	75.6	126	2.13	75.6	G	k	1	-1	1	-1	1
20943424	MGUS	14	82	1.8	488.9	82	1.8	488.9	G	k	1	-1	1	-1	1
91449200	MGUS	3.35	118	2.44	205	118	2.44	205	A	k	1	-1	1	-1	1
91966511	MGUS	1.93	99	2.36	196.6	99	2.36	196.6	A	k	1	-1	1	-1	1
91176452	MGUS	8.67	80	2.11	261	80	2.11	261	G	λ	1	-1	1	-1	1
91712925	MGUS	1.91	97	1.92	209	97	1.92	209	A	k	1	1	1	-1	1
20313846	MGUS	13.5	116	2.02	50.6	116	2.02	50.6	A	k	1	1	1	-1	1
12321516	MGUS	21.8	99	2.67	91.6	99	2.67	91.6	G	k	-	1	1	-1	1
91838067	MGUS	20.5	90	2.38	207.6	90	2.38	207.6	G	k	-1	1	1	-1	1
91761496	MGUS	1.4	90	2.16	182.4	90	2.16	182.4	A	k	-1	-1	1	-1	1
91022396	MGUS	24.1	68	2.31	691	68	2.31	691	G	k	-1	1	1	-1	1
90286455	MGUS	9.8	101	1.95	467.1	101	1.95	467.1	A	k	1	-1	1	-1	1
00765054	MGUS	7.5	130	1.86	82.6	130	1.86	82.6	G	λ	1	-1	1	-1	1
00944026	MGUS	4.5	127	1.88	57.8	127	1.88	57.8	G	λ	1	1	1	-1	1
00673141	MGUS	3.5	140	2.36	165	140	2.36	165	A	k	-1	1	1	-1	1
00862062	MGUS	5.6	141	2.29	56.9	141	2.29	56.9	G	λ	-1	1	1	-1	1
00627110	MGUS	9.8	142	2.24	82.5	142	2.24	82.5	G	λ	-1	-1	1	-1	1
00110225	MGUS	11.4	143	2.65	118.6	143	2.65	118.6	A	k	-1	1	1	-1	1
00701970	MGUS	20.5	135	2.17	154.8	135	2.17	154.8	G	λ	-1	-1	1	-1	1
00612083	MGUS	19.7	132	2.33	107.1	132	2.33	107.1	G	k	-1	-1	1	-1	1
00572334	MGUS	20.6	120	2.27	109	120	2.27	109	G	k	-1	-1	1	-1	1
00780542	MGUS	21.7	128	2.48	75.6	128	2.48	75.6	G	k	-1	-1	1	-1	1
00606386	MGUS	18.9	130	2.45	145	130	2.45	145	G	k	-1	-1	1	-1	1
00585042	MGUS	16.5	130	2.29	109	130	2.29	109	G	λ	-1	-1	1	-1	1
00565737	MGUS	14.6	126	2.24	75.6	126	2.24	75.6	A	k	-1	1	1	-1	1
00538884	MGUS	13.9	120	2.25	474	120	2.25	474	G	k	-1	1	1	-1	1
00768639	MGUS	12	125	2.17	62.9	125	2.17	62.9	G	k	1	1	1	-1	1
00574305	MGUS	11.6	130	2.33	77.1	130	2.33	77.1	G	k	-1	1	1	-1	1
00644021	MGUS	10.8	140	2.19	152.9	140	2.19	152.9	A	k	1	-1	1	-1	1
00919355	MGUS	13.6	129	2.19	82.6	129	2.19	82.6	G	k	1	1	1	-1	1
00832355	MGUS	15.6	128	2.04	91.7	128	2.04	91.7	G	λ	1	1	1	-1	1
00799904	MGUS	9.94	125	2	150	125	2	150	A	k	1	1	1	-1	1
91233028	MGUS	7.55	42.3	2.106	112.95	42.3	2.106	112.95	A	k	1	1	1	-1	1
91517905	MGUS	17.7	70.2	3.582	249.3	70.2	3.582	249.3	A	λ	-	-1	1	-1	1
11357068	MGUS	4.34	57.6	2.016	77.814	57.6	2.016	77.814	A	λ	-1	1	1	-1	1
20451185	MGUS	2.09	81.9	2.052	100.8	81.9	2.052	100.8	G	λ	-1	-1	1	-1	1
11103404	MGUS	3.03	49.5	1.863	47.79	49.5	1.863	47.79	G	λ	-1	-1	1	-1	1
91503338	MGUS	22.8	98.1	1.8	43.497	98.1	1.8	43.497	G	k	1	-1	1	-1	1
20591258	MGUS	33.4	0	1.989	72.9	0	1.989	72.9	A	λ	1	-1	1	-1	1
91396277	MGUS	21.75	60.3	2.502	116.1	60.3	2.502	116.1	G	λ	1	-1	1	-1	1
13864365	MGUS	20.8	99.9	2.124	121.5	99.9	2.124	121.5	G	λ	-1	-1	1	-1	1
90303827	MGUS	22.9	68.4	1.962	99.81	68.4	1.962	99.81	A	λ	-1	1	1	-1	1
20203526	MGUS	15.4	82.8	1.971	162	82.8	1.971	162	A	λ	-1	1	1	-1	1
90695157	MGUS	20.2	59.4	1.881	165.726	59.4	1.881	165.726	G	λ	-1	1	1	-1	1
91492607	MGUS	16.5	44.1	1.863	47.817	44.1	1.863	47.817	A	k	-1	1	1	-1	1
91022006	MGUS	21.6	89.1	1.809	64.845	89.1	1.809	64.845	A	k	-1	-1	1	-1	1
91495990	MGUS	20.6	115.2	2.16	53.613	115.2	2.16	53.613	G	k	-1	1	1	-1	1
91182653	MGUS	19.8	109.8	2.052	102.6	109.8	2.052	102.6	G	λ	-1	-1	1	-1	1
11294667	MGUS	17.75	88.2	1.746	50.058	88.2	1.746	50.058	A	k	-1	-1	1	-1	1
91495713	MGUS	17.4	75.6	1.899	104.31	75.6	1.899	104.31	G	k	-1	1	1	-1	1
13925552	MGUS	16.75	71.1	2.034	644.4	71.1	2.034	644.4	A	λ	-1	1	1	-1	1
20061837	MGUS	28.2	73.8	2.034	408.15	73.8	2.034	408.15	G	λ	-1	1	1	-1	1
91438104	MGUS	20.2	62.1	1.647	60.129	62.1	1.647	60.129	G	k	1	-1	1	-1	1
11017300	MGUS	18.5	79.2	1.629	51.021	79.2	1.629	51.021	A	k	-1	1	1	-1	1
21023199	MGUS	19.5	126.9	2.016	64.152	126.9	2.016	64.152	G	k	1	-1	1	-1	1
91182653	MGUS	18.9	73.8	1.827	72.054	73.8	1.827	72.054	G	k	1	-1	1	-1	1
91469864	MGUS	19.75	73.8	2.502	70.497	73.8	2.502	70.497	A	λ	-1	-1	1	-1	1
13888426	MGUS	17.8	97.2	2.052	50.04	97.2	2.052	50.04	G	k	-1	-1	1	-1	1
91418591	MGUS	20.3	86.4	2.196	63.765	86.4	2.196	63.765	G	k	-1	-1	1	-1	1
91425638	MGUS	20.6	116.1	1.926	37.836	116.1	1.926	37.836	G	k	-1	-1	1	-1	1
91238938	MGUS	22.8	49.5	2.214	199.458	49.5	2.214	199.458	G	k	-1	1	1	-1	1
91402883	MGUS	28.75	116.1	1.917	58.644	116.1	1.917	58.644	G	λ	-1	1	1	-1	1
90958300	MGUS	15.6	65.7	2.016	50.058	65.7	2.016	50.058	G	λ	-1	1	1	-1	1
91402883	MGUS	15.5	100.8	2.16	89.919	100.8	2.16	89.919	A	k	-1	1	1	-1	1
12720189	MGUS	17.25	72	1.593	45.666	72	1.593	45.666	G	k	-1	1	1	-1	1
91387417	MGUS	15.3	97.2	2.061	100.278	97.2	2.061	100.278	G	k	-1	1	1	-1	1
13244353	MGUS	18.25	128.7	1.971	58.5	128.7	1.971	58.5	G	k	-1	1	1	-1	1
91398352	MGUS	20.25	97.2	1.854	55.296	97.2	1.854	55.296	A		1	-1	1	-1	1
91381701	MGUS	23.5	81.9	1.935	92.592	81.9	1.935	92.592	G	k	1	1	1	-1	1
91157051	MGUS	27.8	124.2	2.241	79.2	124.2	2.241	79.2	G	λ	1	-1	1	-1	1
91377098	MGUS	24.3	132.3	1.818	84.213	132.3	1.818	84.213	G	λ	1	-1	1	-1	1
91384223	MGUS	25.25	76.5	2.358	74.772	76.5	2.358	74.772	A	k	1	1	1	-1	1
91387573	MGUS	19.5	104.4	1.773	94.149	104.4	1.773	94.149	G	λ	1	1	1	-1	1
12484653	MGUS	23.5	67.5	1.998	88.965	67.5	1.998	88.965	G	λ	1	1	1	-1	1
91377098	MGUS	15.75	94.5	2.016	67.239	94.5	2.016	67.239	A	k	1	-1	1	-1	1
12484653	MGUS	15.25	75.6	1.737	48.438	75.6	1.737	48.438	G	λ	1	1	1	-1	1
91376468	MGUS	16.25	72	2.124	86.4	72	2.124	86.4	G	k	1	-1	1	-1	1
15203802	MGUS	18.9	84.6	2.124	106.929	84.6	2.124	106.929	G	k	1	-1	1	-1	1
91377098	MGUS	21.75	97.2	1.971	44.451	97.2	1.971	44.451	G	k	1	-1	1	-1	1
13980921	MGUS	24.25	78.3	1.872	146.7	78.3	1.872	146.7	G	k	1	-1	1	-1	1
20394969	MGUS	25.25	112.5	1.971	48.951	112.5	1.971	48.951	G	λ	1	-1	1	-1	1
91368384	MGUS	23.5	48.6	2.142	665.406	48.6	2.142	665.406	A	k	1	-1	1	-1	1
12620371	MGUS	3.415	54.9	2.367	68.796	54.9	2.367	68.796	G	k	1	1	1	-1	1
90373514	MGUS	22.25	85.5	2.016	142.74	85.5	2.016	142.74	G	k	-1	1	1	-1	1
13235787	MGUS	24.8	106.2	1.764	60.804	106.2	1.764	60.804	G	k	-1	1	1	-1	1
91355252	MGUS	25.1	93.6	2.196	97.425	93.6	2.196	97.425	A	λ	-1	1	1	-1	1
20917410	MGUS	44.8	69.3	1.818	125.982	69.3	1.818	125.982	G	λ	-1	-1	1	-1	1
91364735	MGUS	22.8	70.2	2.034	66.24	70.2	2.034	66.24	G	k	-1	1	1	-1	1
90588504	MGUS	17.7	60.3	1.926	94.5	60.3	1.926	94.5	A	λ	-1	1	1	-1	1
91358448	MGUS	17.25	76.5	1.935	77.4	76.5	1.935	77.4	A	λ	1	1	1	-1	1
21023199	MGUS	18.2	80.1	1.746	49.356	80.1	1.746	49.356	A	λ	1	1	1	-1	1
11294667	MGUS	17.8	81.9	2.115	259.47	81.9	2.115	259.47	A	k	1	-1	1	-1	1
91024907	MGUS	20.25	75.6	2.655	122.94	75.6	2.655	122.94	G	λ	1	1	1	-1	1
91999838	MGUS	19.5	86.4	1.746	52.11	86.4	1.746	52.11	G	λ	1	-1	1	-1	1
91244373	MGUS	21.6	45.9	2.196	329.589	45.9	2.196	329.589	G	k	1	-1	1	-1	1
91938324	MGUS	38.2	107.1	2.052	57.69	107.1	2.052	57.69	A	λ	1	-1	1	-1	1
15069552	MGUS	20.2	75.6	1.836	67.761	75.6	1.836	67.761	G	k	1	-1	1	-1	1
91606832	MGUS	17.5	91.8	1.836	192.735	91.8	1.836	192.735	G	λ	1	-1	1	-1	1
91539920	MGUS	25.5	115.2	1.962	94.473	115.2	1.962	94.473	A	λ	1	-1	1	-1	1
91027163	light MM	6.83	67	2.18	380	90.7616	2014	22.19	-	k	-1	-1	1	-1	1
91014939	light MM	9.95	85	2.27	277.9	5.08108	18.8	3.7	-	k	-1	-1	1	-1	1
9041372	light MM	8.05	97	2.44	148.8	16.2381	68.2	4.2	-	k	-1	-1	1	-1	1
90912629	light MM	7.06	99	3.56	202.6	0.00335821	36.45	10854	-	λ	-1	1	1	-1	1
90592923	light MM	5.55	87	2.2	93.2	0.00655814	28.2	4300	-	λ	-1	1	1	-1	1
92147565	light MM	9.8	79		154	10.3478	95.2	9.2	-	k	-1	1	1	-1	1
90157825	light MM	5.53	95	2.06	71.1	0.00117271	5.5	4690	-	λ	-1	-1	1	-1	1
91660474	light MM	6.68	98	2.07	87.7	3.58974	14	3.9	-	λ	-1	-1	1	-1	1
20366511	light MM	5.96	73	2.07	591.5	0.00589928	41	6950	-	λ	-1	-1	1	-1	1
91933762	light MM	9.5	70	1.68	604	15.6552	22.7	1.45	-	k	-1	-1	1	-1	1
91542770	light MM	5.4	98	2.21	77.2	7.78998	1000	128.37	-	k	1	-1	1	-1	1
20766117	light MM	7.03	149	2.49	76	63.1579	240	3.8	-	k	1	-1	1	-1	1
20468721	light MM	8.5	82	2.12	142	0.230053	1.73	7.52	-	λ	1-	-1	1	-1	1
90398145	light MM	9	98	2.54	101.1	0.0843318	183	2170	-	λ	1-	-1	1	-1	1
00917586	light MM	7.8	83	2.18	542	8.47737	618	72.9	-	k	-1	1	1	-1	1
20758010	light MM	2.8305	90	2.12	579.8	0.00703747	60.1	8540	-	λ	-1	-1	1	-1	1
13294928	light MM	3.0735	99	2.27	136	0.103581	40.5	391	-	k	1	1-	1	-1	1
91682437	light MM	4.4775	140	2.14	73.3	1.48	51.8	35	-	k	1	-1	1	-1	1
91920939	light MM	3.6225	119	2.13	82.6	2.05426	106	51.6	-	k	-1	-1	1	-1	1
90897661	light MM	3.177	110	2.85	57.8	5.11696	175	34.2	-		-1	-1	1	-1	1
90483347	light MM	2.4975	60	1.88	175.5	5.2443	16.1	3.07	-	k	-1	-1	1	-1	1
91639972	light MM	4.41	120	2.11	56.9	4.93653	350	70.9	-	λ	-1	-1	1	-1	1
91205247	light MM	2.4885	113	1.86	82.5	5.15982	113	21.9	-	λ	-1	-1	1	-1	1
91658919	light MM	3.006	127	1.88	118.6	3.0445	130	42.7	-	k	-1	1	1	-1	1
21017181	light MM	2.682	82	2.36	154.8	0.267456	45.2	169	-	λ	-1	1-	1	-1	1
91559345	light MM	4.275	110	2.29	107.1	0.109024	44.7	410	-	λ	-1	-1	1	-1	1
92024178	light MM	2.43	104	2.24	109	0.025102	73.8	2940	-	k	-1	-1	1	-1	1
91621433	light MM	3.1635	121	2.28	61.3	0.225284	13.9	61.7	-	λ	-1	-1	1	-1	1
91205247	light MM	3.825	121	1.92	105.2	5.15982	113	21.9	-	k	-1	1-	1	-1	1
91559345	light MM	4.05	120	2.5	159	0.109024	44.7	410	-	k	-1	-1	1	-1	1
90483347	light MM	3.51	84	2.12	347.7	3.81426	230	60.3	-	k	-1	-1	1	-1	1
92147649	light MM	2.8305	115	1.95	73.3	0.269663	9.6	35.6	-	k	-1	1-	1	-1	1
13004655	light MM	8.7	144	2.28	70.3	0.536145	1.78	3.32	-	λ	-1	1-	1	-1	1
91639972	light MM	8.375	134	2.19	58.6	1.99747	15.8	7.91	-	k	-1	1-	1	-1	1
91920939	light MM	14.1	119	2.13	82.6	2.05426	106	51.6	-	k	-1	1-	1	-1	1
91931519	light MM	10.1	91	2.19	77.7	0.114286	17.6	154	-	k	-1	-1	1	-1	1
90575094	light MM	9.25	120	2.12	644.5	0.107399	9.58	89.2	-	k	1	-1	1	-1	1
90735264	light MM	9.75	85	2.15	163.9	0.108721	18.7	172	-	λ	1	-1	1	-1	1
90559344	light MM	9.45	88	2.15	41.6	0.313609	10.6	33.8	-	λ	1	-1	1	-1	1
13900044	light MM	9.875	115	2.19	130.6	1.86756	9.73	5.21	-	k	-1	-1	1	-1	1
90291264	light MM	8.9	103	2.04	137.1	0.0906667	13.6	150	-	λ	-1	0	1	-1	1
10386401	light MM	10.15	162	2.04	68.6	0.702847	3.95	5.62	-	λ	1	-1	1	-1	1
12572205	light MM	10.3	102	1.9	104.2	0.638393	57.2	89.6	-	λ	1	-1	1	-1	1
91508362	light MM	11.4	139	2.12	49.6	0.171564	3.62	21.1	-	k	1	-1	1	-1	1
90890006	light MM	14.375	127	1.85	69.7	0.0927273	10.2	110	-	λ	1	-1	1	-1	1
91449174	light MM	7.8	143	2.45	85.4	0.667647	22.7	34	-	λ	1	-1	1	-1	1
20497027	light MM	7.75	111	2.12	76.6	1.22581	19	15.5	-	k	0	-1	1	-1	1
01238759	light MM	8.625	114	40.3276	67.9	1.72	10	5.81	-	k	1	-1	1	-1	1
01295081	light MM	7.65	145	16.3224	58.8	0.65	3.04	4.69	-	k	-1	1	1	-1	1
01312922	light MM	9.125	104	23.8544	88.2	1.84	10.6	5.77	-	k	-1	1	1	-1	1
01320944	light MM	10.125	99	15.0614	0	1.278	63.9	50	-	k	-1	1	1	-1	1
01211526	light MM	11.75	120	4.29	61.6	1.866	93.3	50	-	λ	-1	-1	1	-1	1
01257921	light MM	13.9	113	4.3	80.5	1.62242	11	6.78	-	k	-1	-1	1	-1	1
01397860	light MM	12.15	136	5.3	47.6	3.03797	12	3.95	-	k	-1	-1	1	-1	1
91578775	light MM	5.05	62	3.7	53.508	17.7885	1480	83.2	-	k	-1	-1	1	-1	1
91585170	light MM	3.9	97	4.5	111.02	0.171223	190.4	1112	-	k	-1	-1	1	-1	1
91582185	light MM	4.7	116	4.41	47.292	4.30769	2688	624	-	k	-1	-1	1	-1	1
202811124	light MM	0.526	89	4.5	75.775	3.36667	808	240	-	k	-1	-1	1	-1	1
10492090	light MM	1.38	75	4.0804	97.986	4.76543	1544	324	-	k	0	-1	1	-1	1
90690268	light MM	1.536	76	4.5	51.52	0.221739	204	920	-	λ	1	-1	1	-1	1
91531171	light MM	2.1	65	4.5	73.5	0.292111	109.6	375.2	-	λ	0	-1	1	-1	1
91348586	light MM	8.2	83	4.2	60.2	146.333	3512	24	-	k	-1	-1	1	-1	1
91577223	light MM	8.24	87	3.7636	38.388	13.3333	272	20.4	-	λ	-1	1	1	-1	1
13540026	light MM	2.32	89	5.5225	201.81	0.0562147	159.2	2832	-	λ	-1	1	1	-1	1
90760737	light MM	1.248	82	4.2	95.62	38.4211	3504	91.2	-	k	0	-1	1	-1	1
91569233	light MM	6.64	94	3.7636	40.53	0.0443312	556.8	12560	-	λ	0	-1	1	-1	1
91431503	light MM	5.6	49	2.44	256.347	0.0740525	203.2	2744	-	k	1	-1	1	-1	1
11710547	light MM	1.34	117	2.28	44.87	4.07609	600	147.2	-	k	1	-1	1	-1	1
20394969	light MM	0.772	82	2.04	52.703	225.667	5416	24	-	k	1	0	1	-1	1
90836970	light MM	3.468	100	2.04	149.905	4.31894	1040	240.8	-	k	1	-1	1	-1	1
91549117	light MM	0.764	126	2.18	73.479	0.101212	267.2	2640	-	λ	-1	-1	1	-1	1
91545623	light MM	5.4	131	2.33	43.736	3.21716	960	298.4	-	k	-1	0	1	-1	1
13365833	light MM	8.72	96	2.41	56.7	3.77358	480	127.2	-	k	-1	-1	1	-1	1
91524381	light MM	8.2	65	2.25	343.7	0.122481	126.4	1032	-	k	1	-1	1	-1	1
91233028	light MM	0.56	50	2.38	84	24	8160	340	-	k	1	-1	1	-1	1
91517905	light MM	9.64	78	2.09	58.8	0.245	78.4	320	-	k	-1	-1	1	-1	1
11357068	light MM	2.32	98	2.11	48.09	0.12076	330.4	2736	-	λ	-1	-1	1	-1	1
20451185	light MM	1.248	67	2.17	79.492	93.3333	10080	108	-	k	-1	1-	1	-1	1
11103404	light MM	6.64	105	1.91	42.707	3.36986	393.6	116.8	-	k	-1	1-	1	-1	1
91503338	light MM	5.6	95	2.27	56.595	22.6404	3224	142.4	-	k	-1	1-	1	-1	1
