# Supplementary material for: Common laboratory results-based artificial intelligence analysis achieves accurate classification of plasma cell dyscrasias
Source: PeerJ journal article supplement (doi:10.7717/peerj.18391), 2024-11-04
Supplement: Table_S1.docx [file Table_S1.docx]

| Monoclonal Antibodies | Fluorochrome | Target Marker | Positive Threshold |
| --- | --- | --- | --- |
| CD45 | FITC | Leukocyte Common Antigen | > 10% |
| CD38 | PE | Plasma Cell Marker | > 10% |
| CD138 | APC | Plasma Cell Marker | > 10% |
| CD19 | PerCP-Cy5.5 | B-cell Marker | > 10% |
| CD56 | PE-Cy7 | NK-cell Marker | > 10% |
| CD117 | APC-Cy7 | Stem Cell Marker | > 10% |
| CD20 | FITC | B-cell Marker | > 10% |
| CD27 | BV421 | T-cell Costimulatory Marker | > 10% |
