# Supplementary material for: Common laboratory results-based artificial intelligence analysis achieves accurate classification of plasma cell dyscrasias
Source: PeerJ journal article supplement (doi:10.7717/peerj.18391), 2024-11-04
Supplement: Table_S2.docx [file Table_S2.docx]

| Tube1 | Antibody Combination | Fluorochrome | Target Marker |
| --- | --- | --- | --- |
| Tube2 | CD45/CD38/CD138 | FITC/PE/APC | Leukocyte and Plasma Cell Markers |
| Tube3 | CD19/CD20/CD117 | PerCP-Cy5.5/FITC/APC-Cy7 | B-cell and Stem Cell Markers |
| Tube4 | CD56/CD28/CD13 | PE-Cy7/APC/FITC | NK-cell and Activation Markers |
| Tube 4 | CD27/CD56 | BV421/PE-Cy7 | T-cell Costimulatory and NK Markers |
